# Supplementary material for: Experimental and computational investigation on the formation pathway of [RuCl2(CO)2(ERR′)2] (E = S, Se, Te; R, R′ = Me, Ph) from [RuCl2(CO)3]2 and ERR′
Source: Royal Society of Chemistry journal article supplement (doi:10.1039/d2dt02018a), 2022-01-01
Supplement: d2dt02018a1.pdf [file d2dt02018a1.pdf]

## Experimental and Computational Investigation on the Formation Pathway of $[\text{RuCl}_2(\text{CO})_2(\text{ERR}')_2]$ ( $\text{E} = \text{S, Se, Te}$ ; $\text{R, R}' = \text{Me, Ph}$ ) from $[\text{RuCl}_2(\text{CO})_3]_2$ and $\text{ERR}'$

Marjaana Taimisto,<sup>a</sup> Tom Bajorek,<sup>a,b</sup> J. Mikko Rautiainen,<sup>c</sup> Tapani A. Pakkanen,<sup>a</sup> Raija Oilunkaniemi,<sup>\*a</sup> Risto S. Laitinen <sup>\*a</sup>

<sup>a</sup> Laboratory of Inorganic Chemistry, Environmental and Chemical Engineering, University of Oulu, P.O. Box 3000, 90014 Oulu, Finland.

<sup>b</sup> Present address: NutriAg Ltd, 62 Arrow Rd Toronto, ON, M9M 2L8 Canada

<sup>c</sup> Department of Chemistry and Nanoscience Center, University of Jyväskylä, P.O. Box 35, 40014 Jyväskylä, Finland.

### SUPPORTING INFORMATION

#### 1. Synthetic Details

- 1.1  $[\text{RuCl}_2(\text{CO})_2(\text{SMePh})_2]$  ( $2_{\text{cct}}$ )
- 1.2  $[\text{RuCl}_2(\text{CO})_2(\text{SeMe}_2)_2]$  ( $4_{\text{cct}}$ ) and  $[\text{RuCl}_2(\text{CO})_3(\text{SeMe}_2)]$  ( $10$ )
- 1.3  $[\text{RuCl}_2(\text{CO})_2(\text{SeMePh})_2]$  ( $5_{\text{cct}}$ ) and  $[\text{RuCl}_2(\text{CO})_3(\text{SeMePh})]$  ( $11$ )
- 1.4  $[\text{RuCl}_2(\text{CO})_2(\text{SePh}_2)_2]$  ( $6_{\text{cct}}$ )
- 1.5  $[\text{RuCl}_2(\text{CO})_2(\text{TeMePh})_2]$  ( $8_{\text{cct}}$ )

#### 2. Crystal Structure Determination of $2_{\text{cct}}$ , $4_{\text{cct}}$ , $5_{\text{cct}}$ , $6_{\text{cct}}$ , $10$ , and $11$

- 2.1 Crystal data
- 2.2 Selected bond lengths and angles of  $\text{cct}-[\text{RuCl}_2(\text{CO})_2(\text{ERR}')_2]$  ( $\text{E} = \text{S, Se, Te}$ ;  $\text{R, R}' = \text{Me, Ph}$ )
- 2.3 Selected bond lengths and angles of  $[\text{RuCl}_2(\text{CO})_3(\text{SeRR}')]_n$  ( $\text{R, R}' = \text{Me, Ph}$ )

#### 3. Tentative Molecular Structure of $[\text{RuCl}_2(\text{CO})_2(\text{TeMePh})_2]$ ( $8_{\text{cct}}$ )

#### 4. Assignment of NMR Spectra of $[\text{RuCl}_2(\text{CO})_2(\text{ERR}')_2]$ and $[\text{RuCl}_2(\text{CO})_3(\text{ERR}')]$ ( $\text{E} = \text{S, Se, Te}$ ; $\text{R, R}' = \text{Me, Ph}$ )

- 4.1  $^{77}\text{Se}$  and  $^{125}\text{Te}$  NMR spectra
- 4.2  $^{13}\text{C}$  chemical shifts of  $[\text{RuCl}_2(\text{CO})_{4-n}(\text{ERR}')_n]$  ( $n = 1, 2$ ;  $\text{E} = \text{Se, Te}$ ;  $\text{R, R}' = \text{Me, Ph}$ )
- 4.3  $^{13}\text{C}\{^1\text{H}\}$  NMR spectra of  $[\text{RuCl}_2(\text{CO})_{4-n}(\text{ERR}')_n]$  ( $n = 1, 2$ ;  $\text{E} = \text{Se, Te}$ ;  $\text{R, R}' = \text{Me, Ph}$ )
- 4.4 Assignment of  $^{13}\text{C}$  chemical shifts

#### 5. Computational Results

#### 6. References

## 1. Synthetic Details

### 1.1 $[\text{RuCl}_2(\text{CO})_2(\text{SMePh})_2]$ (**2<sub>cct</sub>**)

SMePh (0.15 mL, 1.28 mmol) and  $[\text{RuCl}_2(\text{CO})_3]_2$  (0.164 g, 0.320 mmol). Light yellow crystals of  $[\text{RuCl}_2(\text{CO})_2(\text{SMePh})_2]$  (**2<sub>cct</sub>**). Yield 0.073 g (24%). Anal. calcd. for  $\text{C}_{16}\text{H}_{16}\text{Cl}_2\text{O}_2\text{RuS}_2$ : C, 40.34; H, 3.39; S, 13.46. Found: C, 40.15; H, 3.13; S, 13.59. NMR ( $\delta$ , ppm;  $\text{CH}_2\text{Cl}_2$ ):  $^{13}\text{C}$  21.9 ( $\text{CH}_3^-$ ), 129.1, 129.5, 130.3, 134.4 [C(arom)], 189.4 (CO).

### 1.2 $[\text{RuCl}_2(\text{CO})_2(\text{SeMe}_2)_2]$ (**4<sub>cct</sub>**) and $[\text{RuCl}_2(\text{CO})_3(\text{SeMe}_2)]$ (**10**)

$\text{SeMe}_2$  (0.10 mL, 1.29 mmol) and  $[\text{RuCl}_2(\text{CO})_3]_2$  (0.164 g, 0.320 mmol). Yellow and colourless crystals of  $[\text{RuCl}_2(\text{CO})_2(\text{SeMe}_2)_2]$  (**4<sub>cct</sub>**) (0.106 g, yield 37 %) and  $[\text{RuCl}_2(\text{CO})_3(\text{SeMe}_2)]$  (**10**) (0.044 g, yield 19 %), respectively. Anal. calcd. for  $\text{C}_6\text{H}_{12}\text{Cl}_2\text{O}_2\text{RuSe}_2$ : C, 16.16; H, 2.71. Found: C, 16.37; H, 2.65. NMR ( $\delta$ , ppm;  $\text{CH}_2\text{Cl}_2$ ):  $^{13}\text{C}$  14.4 ( $\text{CH}_3^-$ ), 191.6 (CO);  $^{77}\text{Se}$  88. Anal. calcd. for  $\text{C}_5\text{H}_6\text{Cl}_2\text{O}_3\text{RuSe}$ : C, 16.45; H, 1.66. Found: C, 16.75; H, 1.50. NMR ( $\delta$ , ppm;  $\text{CH}_2\text{Cl}_2$ ):  $^{13}\text{C}$  13.6 ( $\text{CH}_3^-$ ), 181.5(1), 185.3(2) (CO);  $^{77}\text{Se}$  55.

### 1.3 $[\text{RuCl}_2(\text{CO})_2(\text{SeMePh})_2]$ (**5<sub>cct</sub>**) and $[\text{RuCl}_2(\text{CO})_3(\text{SeMePh})]$ (**11**)

SeMePh (0.201 g, 1.17 mmol) and  $[\text{RuCl}_2(\text{CO})_3]_2$  (0.150 g, 0.293 mmol). Yellow and colourless crystals of  $[\text{RuCl}_2(\text{CO})_2(\text{SeMePh})_2]$  (**5<sub>cct</sub>**) (0.121 g, yield 36 %) and  $[\text{RuCl}_2(\text{CO})_3(\text{SeMePh})]$  (**11**) (0.032 g, yield 13 %), respectively. Anal. Calcd. for  $\text{C}_{16}\text{H}_{16}\text{Cl}_2\text{O}_2\text{RuSe}_2$ : C, 33.70; H, 2.83. Found: C, 33.96; H, 2.86. NMR ( $\delta$ , ppm;  $\text{CH}_2\text{Cl}_2$ ):  $^{13}\text{C}$  15.0 and 15.1 ( $\text{CH}_3^-$ ), 129.2, 129.6, 130.0, 130.1 [C(arom)], 190.2 and 190.9, 190.9 and 191.7 (CO);  $^{77}\text{Se}$  225 and 227. Anal. Calcd. for  $\text{C}_{10}\text{H}_8\text{Cl}_2\text{O}_3\text{RuSe}$ : C, 28.12; H, 1.89. Found: C, 28.30; H, 1.75. NMR ( $\delta$ , ppm;  $\text{CH}_2\text{Cl}_2$ ):  $^{13}\text{C}$  14.1 ( $\text{CH}_3^-$ ), 127.7, 130.1, 130.4, 130.7 [C(arom)], 181.7(1), 184.5(1), 185.3(1) (CO);  $^{77}\text{Se}$  192.

### 1.4 $[\text{RuCl}_2(\text{CO})_2(\text{SePh}_2)_2]$ (**6<sub>cct</sub>**)

$\text{SePh}_2$  (0.178 g, 0.764 mmol) and  $[\text{RuCl}_2(\text{CO})_3]_2$  (0.095 g, 0.186 mmol). Yellow crystals of  $[\text{RuCl}_2(\text{CO})_2(\text{SePh}_2)_2]$  (**6<sub>cct</sub>**) (0.157 g, yield 42 %). Anal. Calcd. for  $\text{C}_{26}\text{H}_{20}\text{Cl}_2\text{O}_2\text{RuSe}_2$ : C, 44.97; H, 2.90. Found: C, 44.79, H, 2.81. NMR ( $\delta$ , ppm;  $\text{CH}_2\text{Cl}_2$ ):  $^{77}\text{Se}$  418.

### 1.5 $[\text{RuCl}_2(\text{CO})_2(\text{TeMePh})_2]$ (**8<sub>cct</sub>**)

TeMePh (0.308 g, 1.40 mmol) and  $[\text{RuCl}_2(\text{CO})_3]_2$  (0.179 g, 0.350 mmol). Orange-red crystals of  $[\text{RuCl}_2(\text{CO})_2(\text{TeMePh})_2]$  (**8<sub>cct</sub>**) (0.360 g, yield 77 %). Anal. Calcd. for  $\text{C}_{16}\text{H}_{16}\text{Cl}_2\text{O}_2\text{RuTe}_2$ : C, 28.79; H, 2.42. Found: C, 28.61; H, 2.36. NMR ( $\delta$ , ppm;  $\text{CH}_2\text{Cl}_2$ ):  $^{13}\text{C}$  -3.7 and -3.6 ( $\text{CH}_3^-$ ), 114.2, 129.7, 130.1, 134.4 [C(arom)], 192.3 and 192.9, 192.9 and 193.5 (CO);  $^{125}\text{Te}$  427 and 430.

## 2. Crystal Structure Determination of **2<sub>cct</sub>**, **4<sub>cct</sub>**, **5<sub>cct</sub>**, **6<sub>cct</sub>**, **10**, and **11**

### 2.1 Crystal data

**Table S1.** Crystal data for the cct isomers of  $[\text{RuCl}_2(\text{CO})_2(\text{SMePh})_2]$  (**2<sub>cct</sub>**),  $[\text{RuCl}_2(\text{CO})_2(\text{SeMe}_2)_2]$  (**4<sub>cct</sub>**),  $[\text{RuCl}_2(\text{CO})_2(\text{SePh}_2)_2]$  (**6<sub>cct</sub>**),  $[\text{RuCl}_2(\text{CO})_2(\text{TeMePh})_2]$  (**8<sub>cct</sub>**),  $[\text{RuCl}_2(\text{CO})_3(\text{SeMe}_2)]$  (**10**), and  $[\text{RuCl}_2(\text{CO})_3(\text{SeMePh})]$  (**11**).

|                                                                                   | <b>2<sub>cct</sub></b>                                                           | <b>4<sub>cct</sub></b>                                                           | <b>6<sub>cct</sub></b>                                                            | <b>8<sub>cct</sub><sup>a</sup></b>                                                             | <b>10</b>                                                         | <b>11</b>                                                          |
|-----------------------------------------------------------------------------------|----------------------------------------------------------------------------------|----------------------------------------------------------------------------------|-----------------------------------------------------------------------------------|------------------------------------------------------------------------------------------------|-------------------------------------------------------------------|--------------------------------------------------------------------|
| Empirical formula                                                                 | C <sub>16</sub> H <sub>16</sub> O <sub>2</sub> Cl <sub>2</sub> S <sub>2</sub> Ru | C <sub>6</sub> H <sub>12</sub> O <sub>2</sub> Cl <sub>2</sub> Se <sub>2</sub> Ru | C <sub>26</sub> H <sub>20</sub> O <sub>2</sub> Cl <sub>2</sub> Se <sub>2</sub> Ru | C <sub>32</sub> H <sub>32</sub> O <sub>4</sub> Cl <sub>4</sub> Te <sub>4</sub> Ru <sub>2</sub> | C <sub>5</sub> H <sub>6</sub> O <sub>3</sub> Cl <sub>2</sub> SeRu | C <sub>10</sub> H <sub>8</sub> O <sub>3</sub> Cl <sub>2</sub> SeRu |
| Relative molecular mass                                                           | 476.38                                                                           | 446.05                                                                           | 694.31                                                                            | 1334.91                                                                                        | 365.03                                                            | 427.09                                                             |
| Crystal system                                                                    | orthorhombic                                                                     | orthorhombic                                                                     | monoclinic                                                                        | monoclinic                                                                                     | monoclinic                                                        | monoclinic                                                         |
| Space group                                                                       | <i>Pbca</i>                                                                      | <i>P2<sub>1</sub>2<sub>1</sub>2<sub>1</sub></i>                                  | <i>P2<sub>1</sub></i>                                                             | <i>P2<sub>1</sub></i>                                                                          | <i>P2<sub>1</sub>/n</i>                                           | <i>C2/c</i>                                                        |
| <i>T</i> (°C)                                                                     | -153(2)                                                                          | -153(2)                                                                          | -173(2)                                                                           | -153(2)                                                                                        | -123(2)                                                           | -153(2)                                                            |
| <i>a</i> (Å)                                                                      | 9.891(2)                                                                         | 6.9353(14)                                                                       | 6.4041(13)                                                                        | 11.917(2)                                                                                      | 6.1101(12)                                                        | 20.297(4)                                                          |
| <i>b</i> (Å)                                                                      | 12.172(2)                                                                        | 10.764(2)                                                                        | 17.358(4)                                                                         | 11.051(2)                                                                                      | 16.755(3)                                                         | 9.666(2)                                                           |
| <i>c</i> (Å)                                                                      | 30.653(6)                                                                        | 17.208(3)                                                                        | 11.699(2)                                                                         | 16.051(3)                                                                                      | 10.176(2)                                                         | 15.129(3)                                                          |
| $\beta$ (°)                                                                       |                                                                                  |                                                                                  | 103.23(3)                                                                         | 110.59(3)                                                                                      | 102.04(3)                                                         | 112.81(3)                                                          |
| <i>V</i> (Å <sup>3</sup> )                                                        | 3690.4(12)                                                                       | 1284.7(4)                                                                        | 1265.9(5)                                                                         | 1978.8(4)                                                                                      | 1018.9(4)                                                         | 2735.9(11)                                                         |
| <i>Z</i>                                                                          | 8                                                                                | 4                                                                                | 2                                                                                 | 2                                                                                              | 4                                                                 | 8                                                                  |
| $\rho_{\text{calc}}$ (g/cm <sup>3</sup> )                                         | 1.715                                                                            | 2.306                                                                            | 1.821                                                                             | 2.240                                                                                          | 2.380                                                             | 2.074                                                              |
| $\mu$ (mm <sup>-1</sup> )                                                         | 1.370                                                                            | 7.273                                                                            | 3.727                                                                             | 3.957                                                                                          | 5.600                                                             | 4.188                                                              |
| <i>F</i> (000)                                                                    | 1904                                                                             | 840                                                                              | 676                                                                               | 1240                                                                                           | 680                                                               | 1632                                                               |
| Crystal size (mm <sup>3</sup> )                                                   | 0.25 x 0.15 x 0.15                                                               | 0.20 x 0.15 x 0.10                                                               | 0.40 x 0.20 x 0.10                                                                | 0.20 x 0.17 x 0.10                                                                             | 0.35 x 0.15 x 0.15                                                | 0.25 x 0.15 x 0.10                                                 |
| $\theta$ range (°)                                                                | 2.735-26.000                                                                     | 2.232-25.439                                                                     | 2.951-25.989                                                                      | 2.711-24.996                                                                                   | 3.178-27.480                                                      | 2.372-25.015                                                       |
| Refl.                                                                             | 13561/3439                                                                       | 4657/2360                                                                        | 9429/4494                                                                         | 14979/6524                                                                                     | 3882/2305                                                         | 16318/2357                                                         |
| collected/unique                                                                  |                                                                                  |                                                                                  |                                                                                   |                                                                                                |                                                                   |                                                                    |
| No of parameters/restraints                                                       | 211                                                                              | 123                                                                              | 299                                                                               | 209/2                                                                                          | 112                                                               | 156                                                                |
| <i>R</i> <sub>INT</sub>                                                           | 0.0529                                                                           | 0.0259                                                                           | 0.0857                                                                            | 0.0853                                                                                         | 0.0473                                                            | 0.0361                                                             |
| <i>R</i> <sub>1</sub> <sup>b</sup> [ <i>I</i> > 2 <i>s</i> $\sigma$ ( <i>I</i> )] | 0.0399                                                                           | 0.0210                                                                           | 0.0551                                                                            | 0.0973                                                                                         | 0.0379                                                            | 0.0222                                                             |
| <i>wR</i> <sub>2</sub> <sup>c</sup> (all data)                                    | 0.1001                                                                           | 0.0508                                                                           | 0.1738                                                                            | 0.2534                                                                                         | 0.0968                                                            | 0.0565                                                             |
| GoF on <i>F</i> <sup>2</sup>                                                      | 1.051                                                                            | 1.046                                                                            | 1.065                                                                             | 1.073                                                                                          | 1.036                                                             | 1.112                                                              |
| $\Delta\rho_{\text{max,min}}$ (e Å <sup>-3</sup> )                                | 1.940,-0.818                                                                     | 0.468,-0.508                                                                     | 1.103,-1.086                                                                      | 7.092,-1.521                                                                                   | 0.892,-1.033                                                      | 0.518,-0.570                                                       |

<sup>a</sup> The structure determination and refinement is tentative. <sup>b</sup>  $R_1 = \sum ||F_o| - |F_c|| / \sum |F_o|$ . <sup>c</sup>  $wR_2 = [\sum w(|F_o| - |F_c|)^2 / \sum wF_o^2]^{1/2}$ .

## 2.2 Selected bond lengths and angles $cct-[RuCl_2(CO)_2(ERR')_2]$ ( $E = S, Se, Te; R, R' = Me, Ph$ )

**Table S2.** Selected bond lengths (Å) and angles (°) of the  $cct-[RuCl_2(CO)_2(ERR')_2]$  ( $E = S, Se, Te; R, R' = Me, Ph$ ) complexes.<sup>a</sup>

|           | $2_{cct}$  | $3_{cct}^b$ | $4_{cct}$  | $6_{cct}$  | $9_{cct}^c$ |
|-----------|------------|-------------|------------|------------|-------------|
| Ru1-E1    | 2.4084(11) | 2.388(1)    | 2.4908(7)  | 2.4922(16) | 2.6478(7)   |
| Ru1-E2    | 2.3774(12) | 2.406(1)    | 2.5125(7)  | 2.5065(15) | 2.6637(7)   |
| Ru1-X1    | 2.4219(11) | 2.435(1)    | 2.4267(13) | 2.413(3)   | 2.436(2)    |
| Ru1-X2    | 2.4186(10) | 2.412(1)    | 2.4315(14) | 2.438(3)   | 2.444(2)    |
| Ru1-C1    | 1.877(4)   | 1.877(5)    | 1.870(6)   | 1.895(15)  | 1.871(7)    |
| Ru1-C2    | 1.877(5)   | 1.883(5)    | 1.876(5)   | 1.867(12)  | 1.849(8)    |
| C1-O1     | 1.133(5)   | 1.135(6)    | 1.142(7)   | 1.115(17)  | 1.130(9)    |
| C2-O2     | 1.135(5)   | 1.126(6)    | 1.133(6)   | 1.152(16)  | 1.158(9)    |
| E1-Ru1-E2 | 174.11(4)  | 166.19(4)   | 169.05(2)  | 164.01(6)  | 165.51(3)   |
| E1-Ru1-X1 | 92.80(4)   | 84.08(5)    | 83.04(4)   | 88.81(8)   | 82.99(5)    |
| E1-Ru1-X2 | 89.70(4)   | 89.28(5)    | 83.76(4)   | 83.66(8)   | 84.15(5)    |
| E1-Ru1-C1 | 89.74(13)  | 94.3(2)     | 95.66(16)  | 90.2(4)    | 95.4(2)     |
| E1-Ru1-C2 | 90.25(13)  | 90.4(2)     | 95.22(15)  | 94.4(4)    | 94.2(2)     |
| E2-Ru1-X1 | 82.40(4)   | 84.21(5)    | 90.42(4)   | 83.89(8)   | 89.9(2)     |
| E2-Ru1-X2 | 86.88(4)   | 83.86(5)    | 87.85(4)   | 82.36(8)   | 84.15(5)    |
| E2-Ru1-C1 | 93.04(13)  | 92.7(2)     | 92.83(16)  | 103.4(4)   | 95.5(2)     |
| E2-Ru1-C2 | 90.25(13)  | 101.1(2)    | 91.39(15)  | 93.1(4)    | 95.1(2)     |
| X1-Ru1-X2 | 89.70(4)   | 92.14(4)    | 93.07(5)   | 91.64(10)  | 88.95(7)    |
| X1-Ru1-C1 | 92.80(4)   | 88.1(2)     | 87.66(16)  | 86.3(4)    | 89.9(2)     |
| X1-Ru1-C2 | 174.80(13) | 174.2(2)    | 179.00(16) | 173.6(4)   | 177.1(2)    |
| X2-Ru1-C1 | 179.64(14) | 176.5(2)    | 178.15(15) | 176.8(4)   | 178.8(2)    |
| X2-Ru1-C2 | 85.90(12)  | 86.0(2)     | 87.35(16)  | 89.1(4)    | 90.2(2)     |
| C1-Ru1-C2 | 94.46(18)  | 94.1(2)     | 91.9(2)    | 93.4(5)    | 91.0(3)     |

<sup>a</sup> The tentative bond parameters of  $8_{cct}$  are shown in Fig. S1. <sup>b</sup> Ref 1. <sup>c</sup> Ref. 2.

2.3 Selected bond lengths and angles of  $[RuCl_2(CO)_3(SeRR')]$  ( $R,R' = Me, Ph$ )

**Table S3.** Selected bond lengths (Å) and angles (°) of  $[RuCl_2(CO)_3(SeMe_2)]$  (**10**) and  $[RuCl_2(CO)_3(SeMePh)]$  (**11**)

|               | <b>10</b>  | <b>11</b>  |
|---------------|------------|------------|
| Ru1-Se1       | 2.5483(7)  | 2.5239(11) |
| Ru1-Cl1       | 2.4202(13) | 2.4063(9)  |
| Ru1-Cl2       | 2.4132(11) | 2.4188(8)  |
| Ru1-C1        | 1.895(4)   | 1.892(3)   |
| Ru1-C2        | 1.903(5)   | 1.901(3)   |
| Ru1-C3        | 1.944(5)   | 1.946(3)   |
| C1-O1         | 1.141(5)   | 1.134(4)   |
| C2-O2         | 1.133(6)   | 1.134(4)   |
| C3-O3         | 1.130(5)   | 1.121(4)   |
| Se1-Ru1-Cl1   | 92.30(13)  | 84.08(3)   |
| Se1-Ru1-Cl2   | 89.63(3)   | 83.17(2)   |
| Se1-Ru1-C1    | 92.3(13)   | 93.85(8)   |
| Se1-Ru1-C2    | 86.29(12)  | 83.89(9)   |
| Se1-Ru1-C3    | 174.71(13) | 169.31(9)  |
| Cl1-Ru1-Cl2   | 90.81(4)   | 89.99(3)   |
| Cl1-Ru1-C1    | 86.27(13)  | 90.34(9)   |
| Cl1-Ru1-C2    | 176.16(13) | 176.92(9)  |
| Cl1-Ru1-C3    | 91.59(11)  | 86.85(10)  |
| Cl2-Ru1-C1    | 176.5(13)  | 176.95(9)  |
| Cl2-Ru1-C2    | 89.16(14)  | 87.46(9)   |
| Cl2-Ru1-C3    | 85.27(13)  | 91.21(9)   |
| C1-Ru1-C2     | 93.88(19)  | 92.11(12)  |
| C1-Ru1-C3     | 92.87(18)  | 91.83(12)  |
| C2-Ru1-C3     | 92.23(13)  | 94.94(13)  |
| C111-Se1-C121 | 96.4(2)    | 101.73(14) |

### 3. Tentative Molecular Structure of $[\text{RuCl}_2(\text{CO})_2(\text{TeMePh})_2]$ ( $\mathbf{8}_{cct}$ ).

The crystals of  $cct$ - $[\text{RuCl}_2(\text{CO})_2(\text{TeMePh})_2]$  ( $\mathbf{8}_{cct}$ ) scattered X-rays only weakly. Therefore, the full anisotropic refinement of the non-hydrogen atoms was not possible. The anisotropic displacement of the carbon atoms in TeMePh ligands were therefore constrained to be equal within the given ligand. While the refinement must thus be considered only tentative, it provides unambiguous information about the identity of the complex (see Fig. S1).

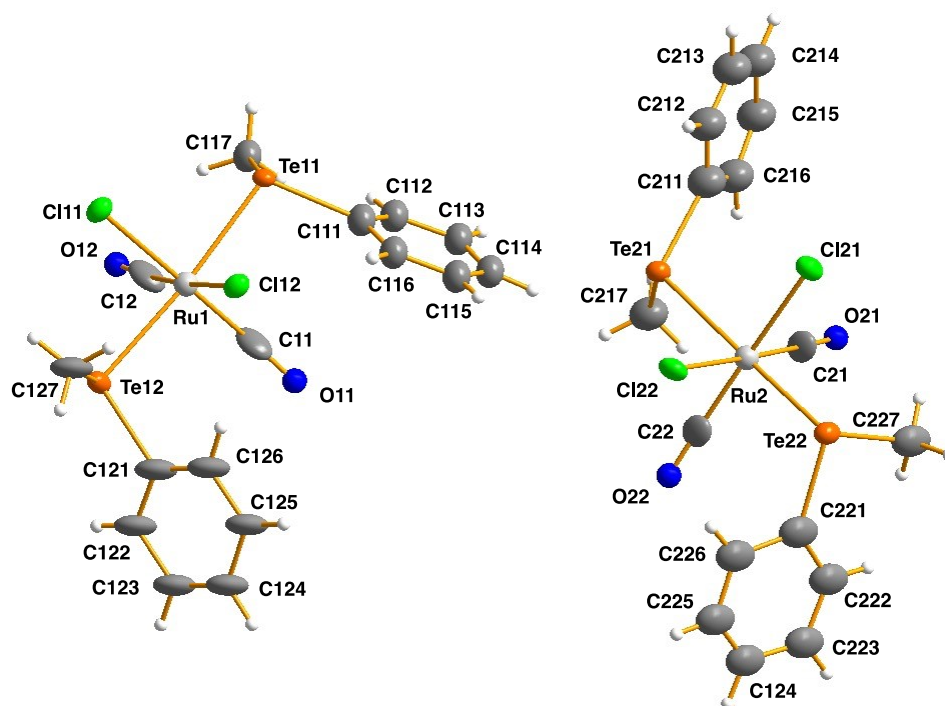

**Fig. S1.** Tentative molecular structure of  $cct$ - $[\text{RuCl}_2(\text{CO})_2(\text{TeMePh})_2]$  ( $\mathbf{8}_{cct}$ ). The anisotropic displacement parameters are displayed in 50 % probability level. The selected bond lengths ( $\text{\AA}$ ) and angles ( $^\circ$ ): Ru-Te 2.624(4)-2.662(4), Ru-Cl 2.423(9)-2.447(10), Ru-C 1.82(4)-1.91(4), Te-C 2.067(16)-2.145(15), Te-Ru-Te 167.85(16)-174.63(14), Te-Ru-Cl 82.4(3)-95.6(2), Te-Ru-C 92.5(11)-98.1(12), Cl-Ru-Cl 88.7(3)-91.7(3), Cl-Ru-C(*trans*) 174.7(12)-178.9(12), Cl-Ru-C(*cis*) 85.9(11)-88.3(12), C-Ru-C 94.5(15)-96.6(17).

#### 4. Assignment of NMR Spectra of $[\text{RuCl}_2(\text{CO})_2(\text{ERR}')_2]$ and $[\text{RuCl}_2(\text{CO})_3(\text{ERR}')] (E = \text{S, Se, Te; R, R}' = \text{Me, Ph})$

##### 4.1 $^{77}\text{Se}$ and $^{125}\text{Te}$ NMR spectra

The  $^{77}\text{Se}$  and  $^{125}\text{Te}$  chemical shifts have been listed in Sections 1.2-1.5. The main features in the  $^{77}\text{Se}$  and  $^{125}\text{Te}$  NMR spectra of  $cct\text{-}[\text{RuCl}_2(\text{CO})_2(\text{ERR}')_2]$  ( $E = \text{Se, Te}$ ) are exemplified in Fig. S2 by  $cct\text{-}[\text{RuCl}_2(\text{CO})_2(\text{SeMe}_2)_2]$  (**4<sub>cct</sub>**),  $cct\text{-}[\text{RuCl}_2(\text{CO})_2(\text{TePh}_2)_2]$  (**9<sub>cct</sub>**),<sup>2</sup>  $cct\text{-}[\text{RuCl}_2(\text{CO})_2(\text{SeMePh})_2]$  (**5<sub>cct</sub>**), and  $cct\text{-}[\text{RuCl}_2(\text{CO})_2(\text{TeMePh})_2]$  (**8<sub>cct</sub>**). Whereas there is no crystal structure available for **5<sub>cct</sub>**, its identity can be verified by comparison of its  $^{77}\text{Se}$  NMR resonance with the  $^{125}\text{Te}$  NMR resonance of **8<sub>cct</sub>**. The observed  $^{77}\text{Se}$  chemical shifts of 225 and 227 ppm for **5<sub>cct</sub>** and  $^{125}\text{Te}$  chemical shifts of 427 and 430 ppm for **8<sub>cct</sub>** are consistent with the reported relationship of  $[\delta(\text{Te}) \sim (1.8) \cdot \delta(\text{Se})]$  in analogous molecular species.<sup>3</sup>

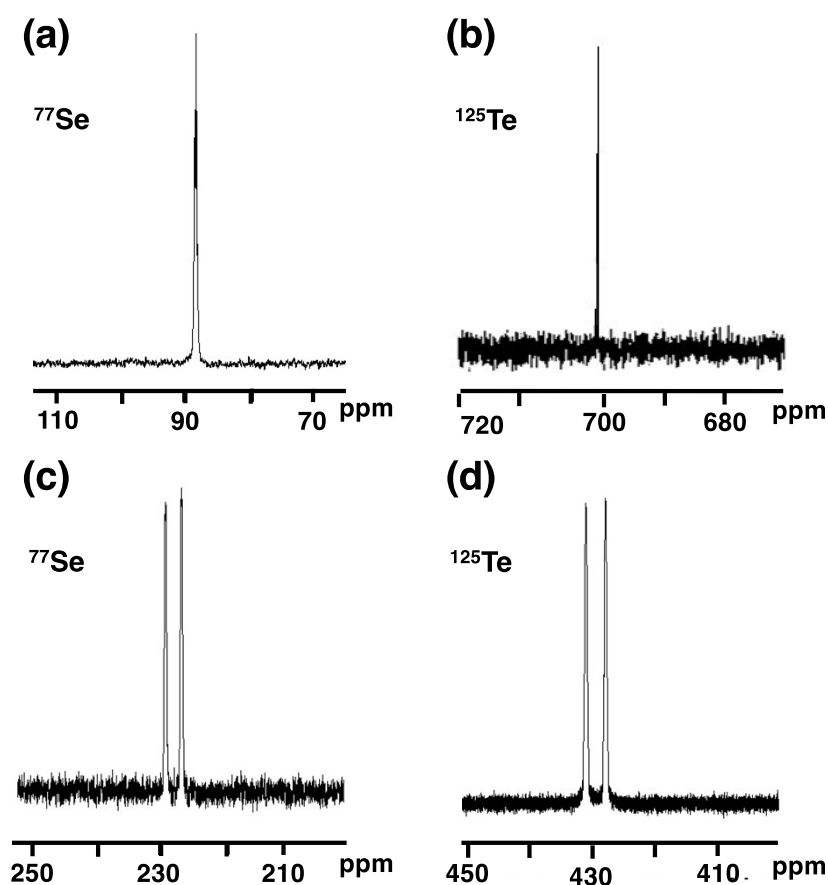

**Fig. S2.** (a)  $^{77}\text{Se}$  NMR spectrum of  $cct\text{-}[\text{RuCl}_2(\text{CO})_2(\text{SeMe}_2)_2]$ . (b)  $^{125}\text{Te}$  NMR spectrum of  $cct\text{-}[\text{RuCl}_2(\text{CO})_2(\text{TePh}_2)_2]$ .<sup>2</sup> (c)  $^{77}\text{Se}$  NMR spectrum of  $cct\text{-}[\text{RuCl}_2(\text{CO})_2(\text{SeMePh})_2]$ . (d)  $^{125}\text{Te}$  NMR spectrum of  $cct\text{-}[\text{RuCl}_2(\text{CO})_2(\text{TeMePh})_2]$ .

If free or relatively unrestricted rotation of the chalcogenoether ligand about the Ru-E bond is assumed, the complexes containing symmetrically substituted seleno- and telluroether ligands show expectedly only one resonance in their  $^{77}\text{Se}$  or  $^{125}\text{Te}$  NMR spectra [see Figs. S2(a) and S2(b)] indicating two chemically and magnetically equivalent nuclei in the complexes at NMR timescale. In case of complexes containing asymmetrically substituted chalcogenoethers, the NMR spectra show two close-lying resonances of equal intensity [see Fig. S2(c) and S2(d)]. They can be interpreted as the occurrence of two stereoisomers **A** and **B** with equal probability (the arrows in Fig. S3 indicate the possibility of the rotation of the ligand about the Ru-E bond), as shown in the Fig. S2.

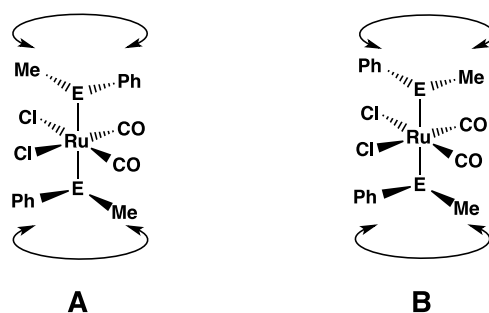

**Fig. S3.** The two possible stereoisomers of  $cct\text{-}[\text{RuCl}_2(\text{CO})_2(\text{EMePh})_2]$  ( $E = \text{S, Se, Te}$ ).

Similar situations of two very close-lying  $^{77}\text{Se}$  or  $^{125}\text{Te}$  NMR resonances due to the presence of two stereoisomers can also be exemplified by  $[\text{Co}(\text{dmgH})_2\{\text{Te}(\text{Ph})(\text{CH}_2)_3\text{SO}_3\text{Na}\}_2][\text{BF}_4]$  ( $\text{dmgH}^- = \text{dimethylglyoximate}$ )<sup>4</sup> and  $\text{Se}[\text{NH}(\text{mes})]_2$  ( $\text{mes} = \text{mesityl, 2,4,6-trimethylphenyl}$ ).<sup>5</sup> The assignment in the latter case was verified by the PBE0/TZVP(P)//PBE0/TZVP computation of isotropic shielding tensors and consequently the  $^{77}\text{Se}$  chemical shifts.

The nature of the rotamers and their impact on NMR spectra have been discussed in Section 4.2.

#### 4.2 $^{13}\text{C}$ chemical shifts of $[\text{RuCl}_2(\text{CO})_{4-n}(\text{ERR}')_n]$ ( $n = 1, 2; E = \text{Se, Te; R, R}' = \text{Me, Ph}$ )

The  $^{13}\text{C}$  chemical shifts obtained from the  $^{13}\text{C}\{^1\text{H}\}$  NMR spectra of the isolated products **2<sub>cct</sub>**, **4<sub>cct</sub>**, **5<sub>cct</sub>**, **8<sub>cct</sub>**, **9<sub>cct</sub>**,<sup>2</sup> and the related  $[\text{RuCl}_2(\text{CO})_2(\text{Te}(\text{CH}_2\text{SiMe}_3)_2)_2]$ <sup>6</sup> are summarized in the Table S4. The  $^{13}\text{C}\{^1\text{H}\}$  NMR spectra of the complexes recorded in this contribution are shown in Figs. S4-S10.

**Table S4.**  $^{13}\text{C}$  chemical shifts (ppm) of the stoichiometrically pure  $[\text{RuCl}_2(\text{CO})_{4-n}(\text{ERR}')_n]$  ( $n = 1, 2; E = \text{Se, Te; R, R}' = \text{Me, Ph}$ ),  $[\text{RuCl}_2(\text{CO})_2(\text{TePh}_2)_2]$ , and  $[\text{RuCl}_2(\text{CO})_2(\text{Te}(\text{CH}_2\text{SiMe}_3)_2)_2]$ .

| $cct\text{-}[\text{RuCl}_2(\text{CO})_2(\text{ERR}')_2]$                                  | -CH <sub>3</sub> | -CH <sub>2</sub> - | C(arom.)                | CO                      |
|-------------------------------------------------------------------------------------------|------------------|--------------------|-------------------------|-------------------------|
| <b><math>[\text{RuCl}_2(\text{CO})_3(\text{ERR}')]_2</math></b>                           |                  |                    |                         |                         |
| $[\text{RuCl}_2(\text{CO})_3(\text{SeMe}_2)]$ ( <b>10</b> )                               | 13.6             |                    | -                       | 181.5(1) 185.3(2)       |
| $[\text{RuCl}_2(\text{CO})_3(\text{SeMePh})]$ ( <b>11</b> ) <sup>a</sup>                  | 14.1             |                    | 127.7 130.1 130.2 130.7 | 181.7 184.5 185.3       |
| <b><math>cct\text{-}[\text{RuCl}_2(\text{CO})_2(\text{ERR}')_2]</math></b>                |                  |                    |                         |                         |
| $[\text{RuCl}_2(\text{CO})_2(\text{SMePh})_2]$ ( <b>2<sub>cct</sub></b> )                 | 21.9             |                    | 129.1 129.5 130.3 134.4 | 189.4                   |
| $[\text{RuCl}_2(\text{CO})_2(\text{SeMe}_2)_2]$ ( <b>4<sub>cct</sub></b> )                | 14.4             |                    | -                       | 191.6                   |
| $[\text{RuCl}_2(\text{CO})_2(\text{SeMePh})_2]$ ( <b>5<sub>cct</sub></b> ) <sup>a,b</sup> | 15.0/15.1        |                    | 129.2 129.6 130.1 130.2 | 190.2/190.9 190.9/191.7 |
| $[\text{RuCl}_2(\text{CO})_2(\text{TeMePh})_2]$ ( <b>8<sub>cct</sub></b> ) <sup>a,b</sup> | -3.6/-3.7        |                    | 114.2 129.7 130.1 134.4 | 192.3/192.9 192.9/193.5 |
| $[\text{RuCl}_2(\text{CO})_2(\text{TePh})_2]$ ( <b>9<sub>cct</sub></b> ) <sup>c</sup>     |                  |                    | 117.2 130.1 130.4 135.8 | 192.5                   |
| $[\text{RuCl}_2(\text{CO})_2(\text{Te}(\text{CH}_2\text{SiMe}_3)_2)_2]$ <sup>d</sup>      | -0.1             | 0.7                | -                       | 194.5                   |

<sup>a</sup> Restricted rotation of the ligand, see the text below. <sup>b</sup> Two stereoisomers, see 4.1 and the text below. <sup>c</sup> Ref. 2. <sup>d</sup> Ref. 6.



4.3  $^{13}\text{C}\{^1\text{H}\}$  NMR spectra of  $[\text{RuCl}_2(\text{CO})_{4-n}(\text{ERR}')_n]$  ( $n = 1, 2$ ;  $E = \text{Se}, \text{Te}$ ;  $R, R' = \text{Me}, \text{Ph}$ )

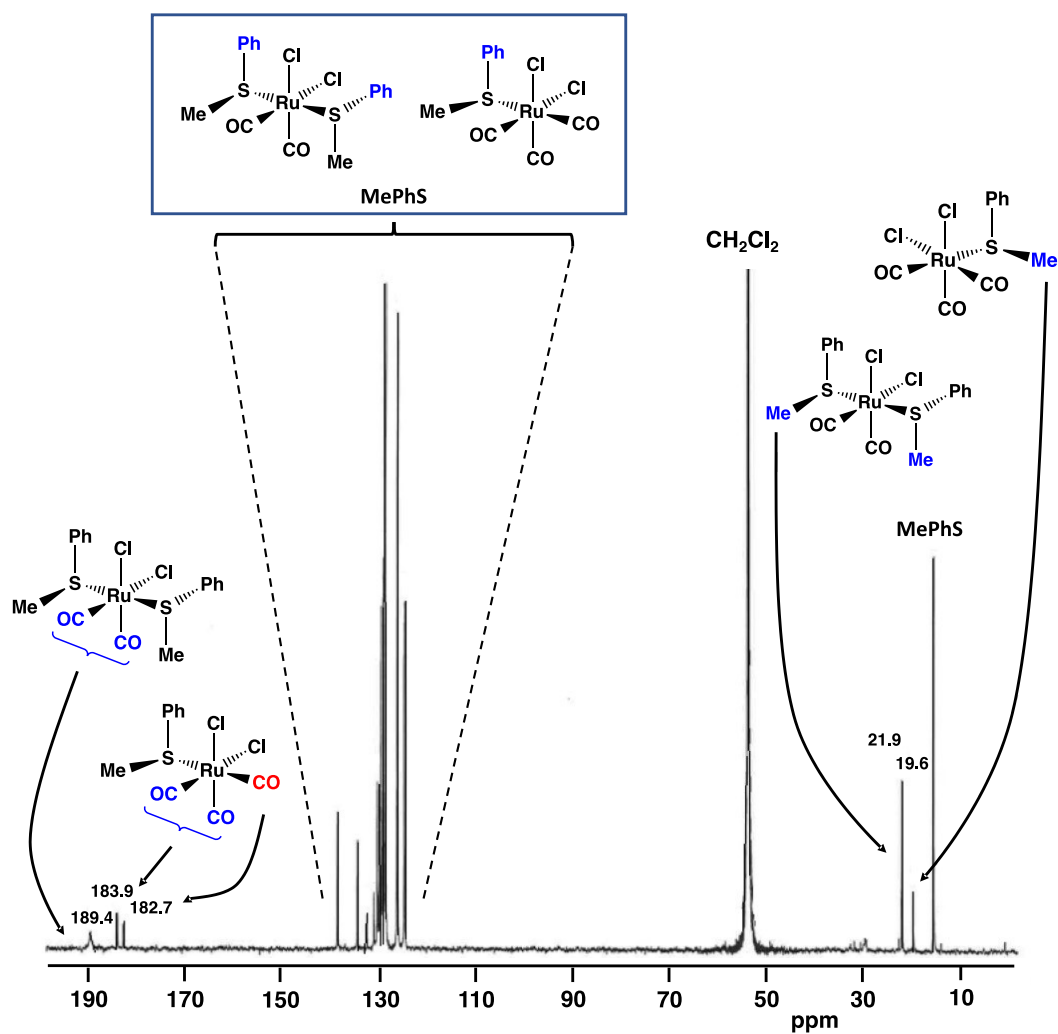

Fig. S4.  $^{13}\text{C}\{^1\text{H}\}$  NMR spectrum of the reaction mixture of  $[\text{RuCl}_2(\text{CO})_3(\text{SMePh})]$  and *cct*- $[\text{RuCl}_2(\text{CO})_2(\text{SMePh})_2]$  ( $2_{cct}$ ) in  $\text{CH}_2\text{Cl}_2$ .

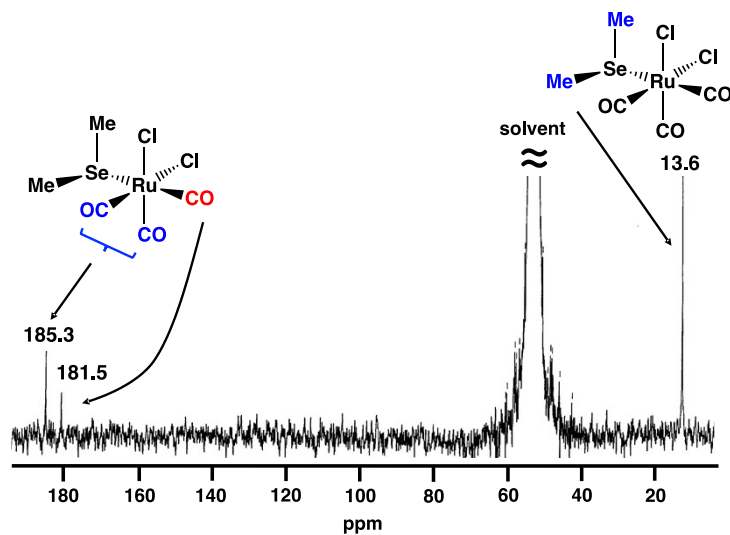

Fig. S5.  $^{13}\text{C}\{^1\text{H}\}$  NMR spectrum of  $[\text{RuCl}_2(\text{CO})_3(\text{SeMe}_2)]$  (**10**) in  $\text{CH}_2\text{Cl}_2$ .

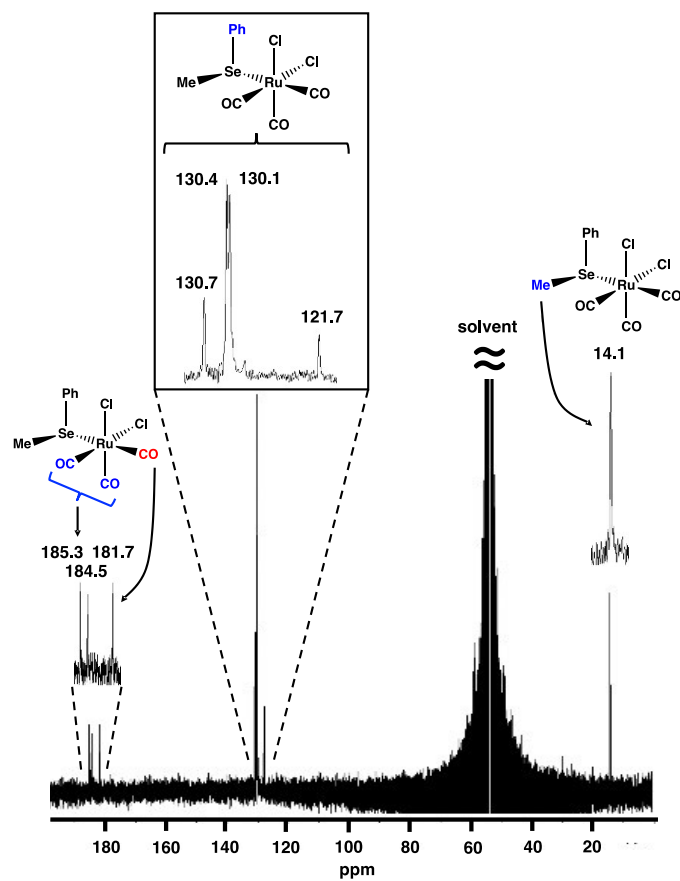

Fig. S6.  $^{13}\text{C}\{^1\text{H}\}$  NMR spectrum of  $[\text{RuCl}_2(\text{CO})_3(\text{SeMePh})]$  (**11**) in  $\text{CH}_2\text{Cl}_2$ .

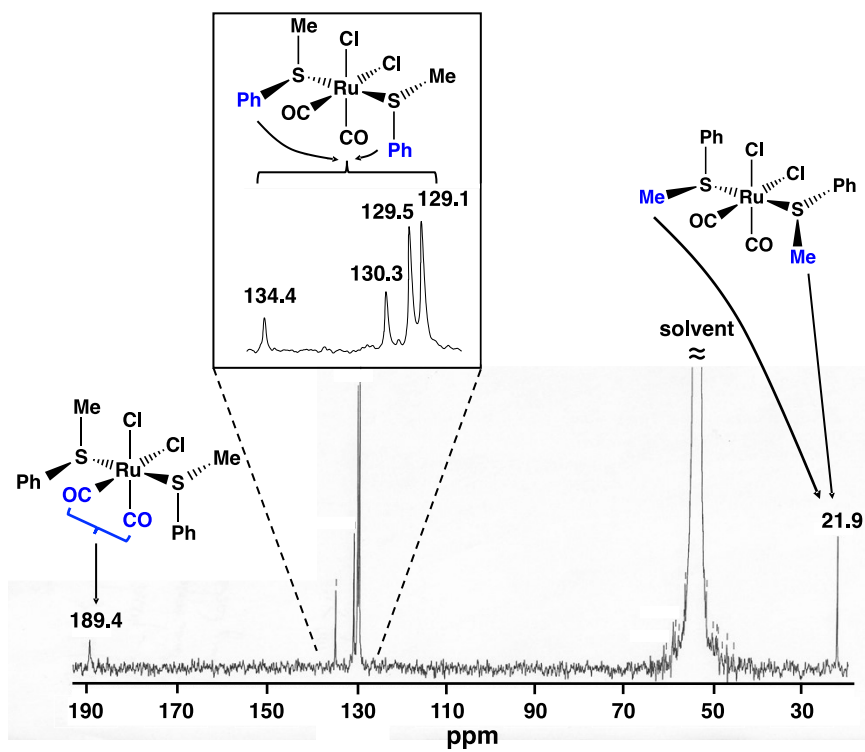

Fig. S7.  $^{13}\text{C}\{^1\text{H}\}$  NMR spectrum of  $cct\text{-}[\text{RuCl}_2(\text{CO})_2(\text{SMePh})_2]$  (**2<sub>cct</sub>**) in  $\text{CH}_2\text{Cl}_2$ .

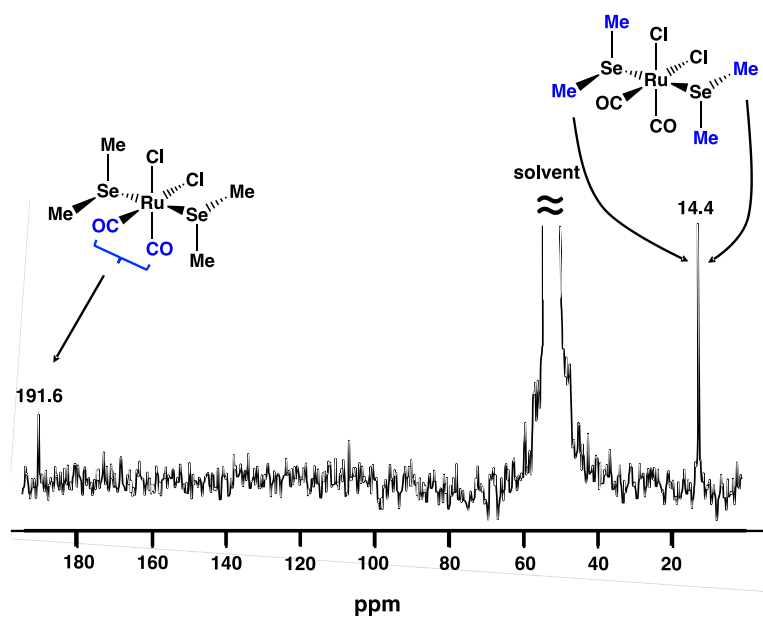

Fig S8.  $^{13}\text{C}\{^1\text{H}\}$  NMR spectrum of  $cct\text{-}[\text{RuCl}_2(\text{CO})_2(\text{SeMe}_2)_2]$  ( $4_{cct}$ ) in  $\text{CH}_2\text{Cl}_2$ .

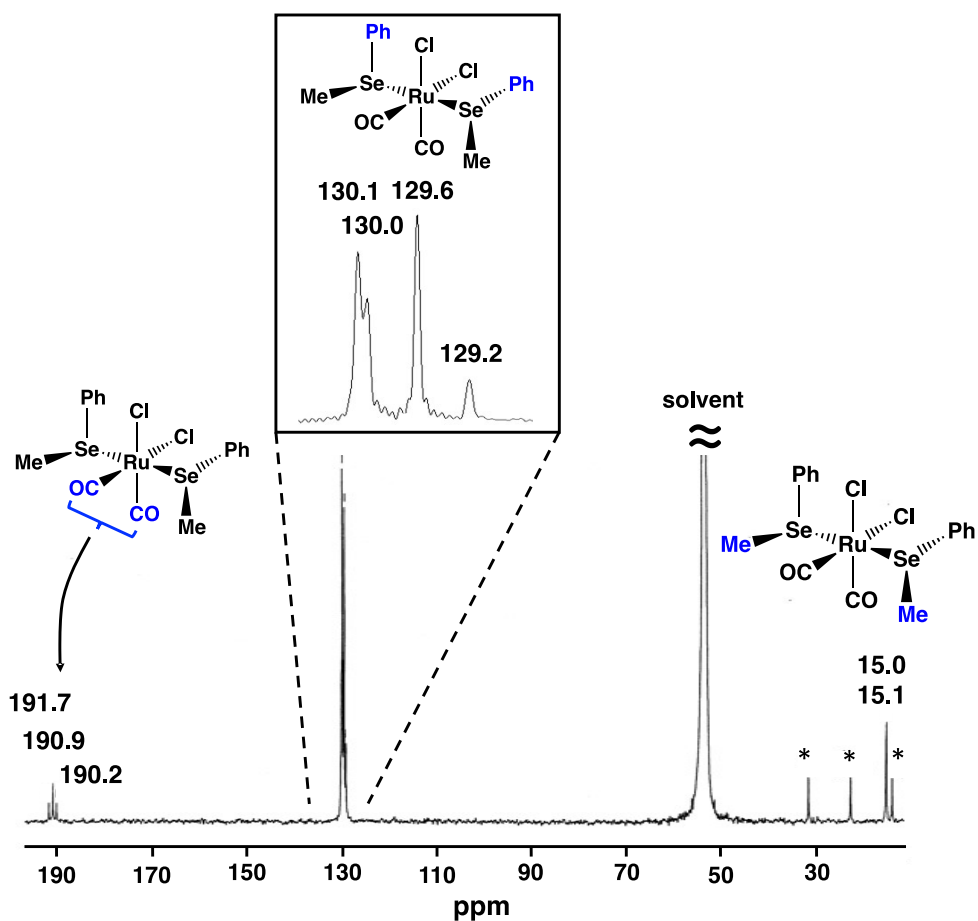

Fig. S9  $^{13}\text{C}\{^1\text{H}\}$  NMR spectrum of  $cct\text{-}[\text{RuCl}_2(\text{CO})_2(\text{SeMePh})_2]$  in  $\text{CH}_2\text{Cl}_2$ . The resonance marked with \* are due to residual hexane.

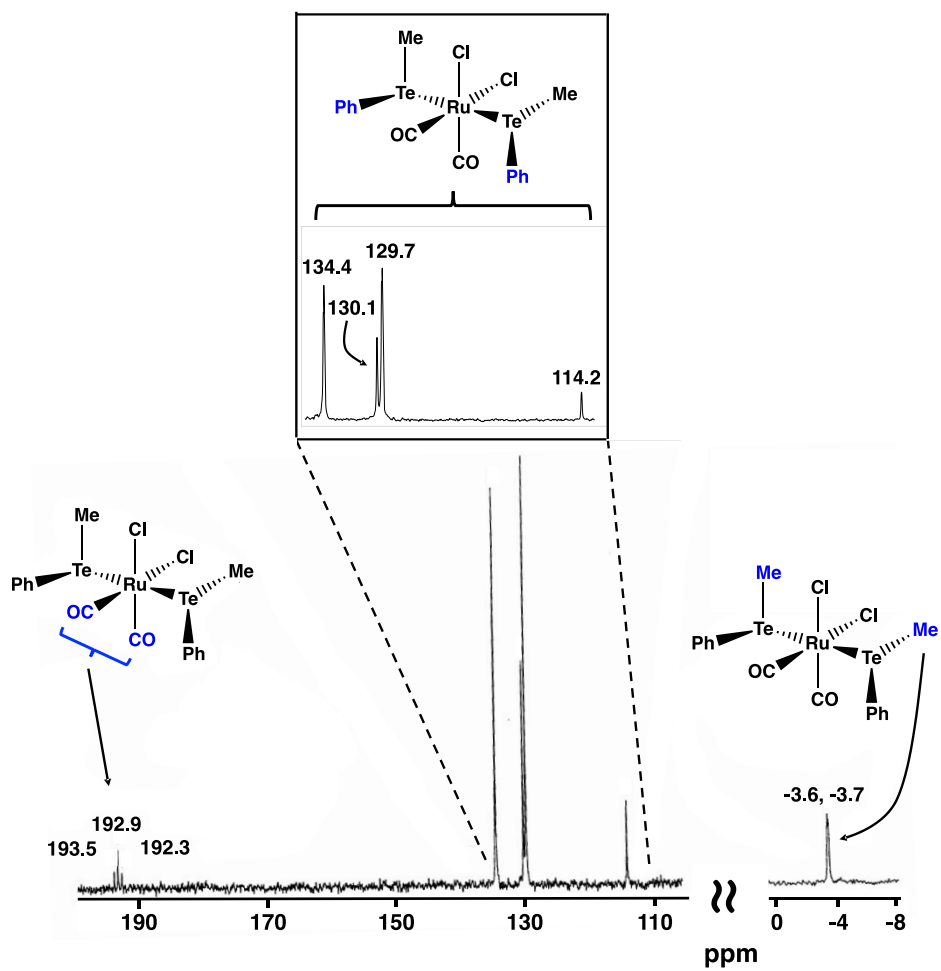

Fig. S10.  $^{13}\text{C}\{^1\text{H}\}$  NMR spectrum of  $cct\text{-}[\text{RuCl}_2(\text{CO})_2(\text{TeMePh})_2]$  in  $\text{CH}_2\text{Cl}_2$ .

#### 4.4 Assignment of $^{13}\text{C}$ chemical shifts

If relatively free rotation of the chalcogenoether ligand about the Ru-E bond in  $[\text{RuCl}_2(\text{CO})_3(\text{ERR}')]$  is assumed in solution, the complex shows the virtual symmetry of  $C_s$  and the CO ligands should show two  $^{13}\text{C}$  resonances in the intensity ratio of 2:1 for respective *cis*- and *trans*-positions with respect to the chalcogenoether ligand. For the same reason, all  $[\text{RuCl}_2(\text{CO})_2(\text{ERR}')_2]$  should show the virtual point group  $C_{2v}$  and the two CO ligands were expected to be equivalent and show only one  $^{13}\text{C}$  resonance. Some spectra, however, turned out to be more complicated.

While  $[\text{RuCl}_2(\text{CO})_3(\text{SeMe}_2)]$  (**10**) exhibits the expected two  $^{13}\text{C}$  resonances at 185.3 and 181.5 ppm in the intensity ratio of 2:1, there are three resonances of equal intensity observed at 185.3, 184.5, and 181.7 ppm for  $[\text{RuCl}_2(\text{CO})_3(\text{SeMePh})]$  (**11**). This indicates that with bulkier organic substituents of the chalcogenoethers, the rotation may be restricted at least partially, or be slow at the NMR timescale, thus rendering all three CO ligands inequivalent.

The PBE0-D3/def2-TZVP calculations of the rotational barriers in  $[\text{RuCl}_2(\text{CO})_3(\text{SeMe}_2)]$  (**10**) are shown in Fig. S11. There are four local energy minima with the torsional angle of C3-Ru1-Se1-C111 at 32, 128, 248, and 272 ° (for the numbering of atoms, see Fig. 3 in the main text). The two first minimum-energy rotamers show the point group  $C_1$  and are in fact mutual mirror images lying at global minima (denoted I and II in Fig. S11). The two last local minima are close to each other and are in fact a mirror-image pair with a very small barrier between them. The symmetry of this average rotamer (denoted III) is  $C_s$  and lies *ca.* 2 kJ mol $^{-1}$  above the local minima I and II. The rotational barrier I  $\rightarrow$  II is *ca.* 10 kJ mol $^{-1}$  and the barriers II  $\rightarrow$  III and III  $\rightarrow$  I are identical at about 8 kJ mol $^{-1}$ .

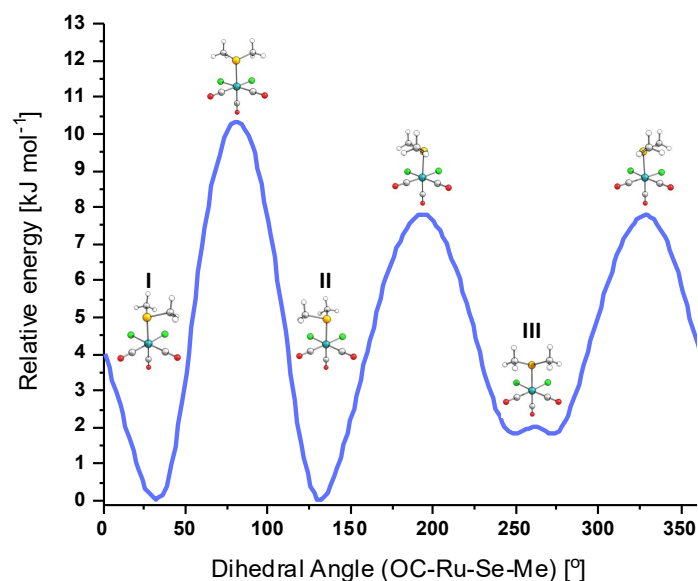

**Fig. S11.** Energy barriers of the rotation of  $\text{SeMe}_2$  about the Ru-Se bond in  $[\text{RuCl}_2(\text{CO})_3(\text{SeMe}_2)]$ .

All rotational barriers are very low and the rotamers I-III can therefore undergo rapid interconversion at NMR timescale. Thus, the two CO ligands *cis* to the  $\text{SeMe}_2$  ligand appear equivalent but different from the CO-ligand *trans* to  $\text{SeMe}_2$ . Thus, the observed two resonances at 2:1 intensity ratio is quite expected.

The rotation scheme is analogous in case of  $[\text{RuCl}_2(\text{CO})_3(\text{SeMePh})]$  (**11**), but while the geometries of rotamers in local energy minima I-III are rather similar to those of **10**, their relative energies differ significantly (see Fig. S12).

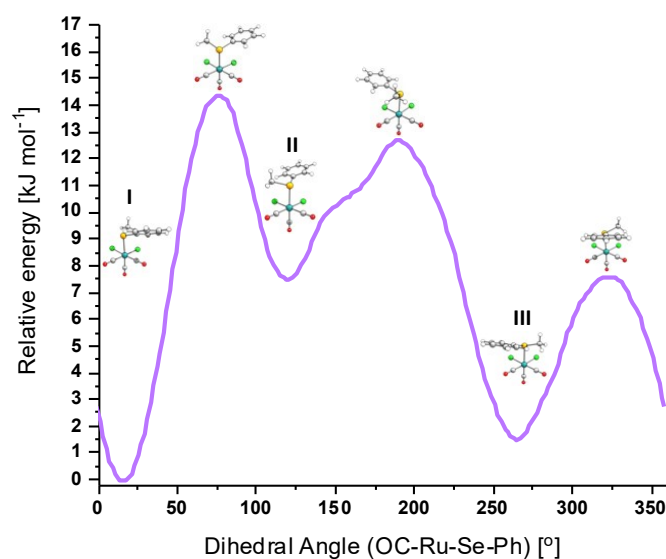

**Fig. S12.** Energy barriers of the rotation of SeMePh about the Ru-Se bond in  $[\text{RuCl}_2(\text{CO})_3(\text{SeMePh})]$ .

The rotamer **I** still lies in the global minimum, but **II** is *ca.*  $7.5 \text{ kJ mol}^{-1}$  and **III** *ca.*  $1.5 \text{ kJ mol}^{-1}$  higher in energy. One rotational barrier is also significantly higher in **11** than in **10**. The rotational barrier **I**  $\rightarrow$  **II** is almost  $15 \text{ kJ mol}^{-1}$ . Those of **II**  $\rightarrow$  **III** and **II**  $\rightarrow$  **III** are only *ca.*  $5 \text{ kJ mol}^{-1}$  and *ca.*  $6 \text{ kJ mol}^{-1}$ , respectively. The SeMePh ligand is fluxional also in this complex. The most significant difference to the complex **10** is that regardless of the relative occurrence of the rotamers **I-III** in solution, the *cis*-CO ligands are always inequivalent and therefore, all three CO carbons should show separate resonances. This is consistent with the observation of three  $^{13}\text{C}$  resonances of the relative intensity ratio of 1:1:1 in the NMR spectrum of **11** (see Fig. S6).

The analogous rotation barriers in  $[\text{RuCl}_2(\text{CO})_3(\text{SePh}_2)]$  are more irregular, though the general features are rather similar to those of  $[\text{RuCl}_2(\text{CO})_3(\text{SeMe}_2)]$  and  $[\text{RuCl}_2(\text{CO})_3(\text{SeMePh})]$  (see Fig. S13).

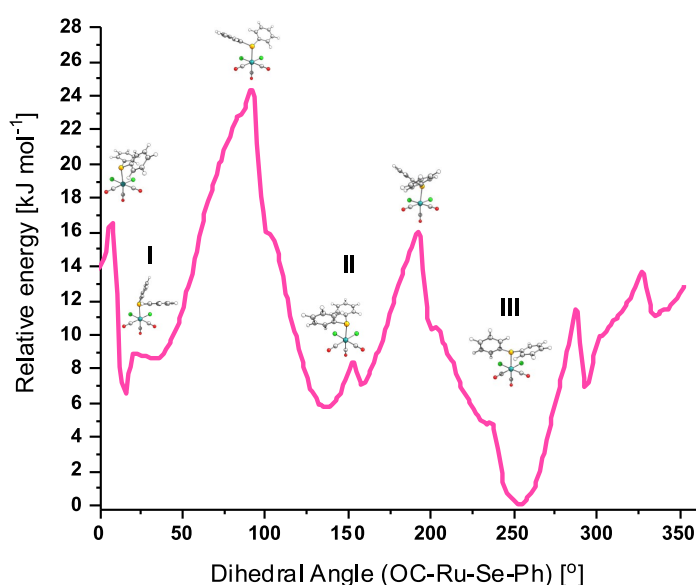

**Fig. S13.** Energy barriers of the rotation of SePh<sub>2</sub> about the Ru-Se bond in  $[\text{RuCl}_2(\text{CO})_3(\text{SePh}_2)]$ .

The local minima in  $[\text{RuCl}_2(\text{CO})_3(\text{SePh}_2)]$  are similar to those in  $[\text{RuCl}_2(\text{CO})_3(\text{SeMe}_2)]$  and  $[\text{RuCl}_2(\text{CO})_3(\text{SeMePh})]$  and the barriers between the minima **I-III** are  $8\text{-}16 \text{ kJ mol}^{-1}$ . Enabling

interconversion between them at ambient temperature. The *cis*-CO ligands therefore appear virtually identical at NMR timescale and two resonances at intensity ratio of 2:1 are observed.

The situation is quite similar in case of *cct*-[RuCl<sub>2</sub>(CO)<sub>2</sub>(EMe<sub>2</sub>)<sub>2</sub>]. The related DFT calculations of rotating two *trans*-SeMe<sub>2</sub> in [RuCl<sub>2</sub>(CO)<sub>2</sub>(SeMe<sub>2</sub>)<sub>2</sub>] with respect to each other show three barriers of 6-13 kJ mol<sup>-1</sup> (see Fig. S14). This again allows for relatively free rotation of both SeMe<sub>2</sub> ligands with apparent symmetry equivalence of the two *cis*-CO ligands. In case of unsymmetric chalcogenoether EMePh, the two CO ligands are again inequivalent showing two close-lying resonances.

Furthermore, the two <sup>13</sup>C resonances of the [RuCl<sub>2</sub>(CO)<sub>2</sub>(EMePh)<sub>2</sub>] complexes (**5<sub>cct</sub>** and **8<sub>cct</sub>**) appear as pairs because of the presence of two stereoisomers in [RuCl<sub>2</sub>(CO)<sub>2</sub>(EMePh)<sub>2</sub>] (E = Se, Te; see Section 4.1). The chemical shifts of the two middle resonances almost coincide, and these four resonances appear as approximate 1:2:1 triplet in the case of both complexes **5<sub>cct</sub>** and **8<sub>cct</sub>** (see Figs. S9, S10, and S15 ).

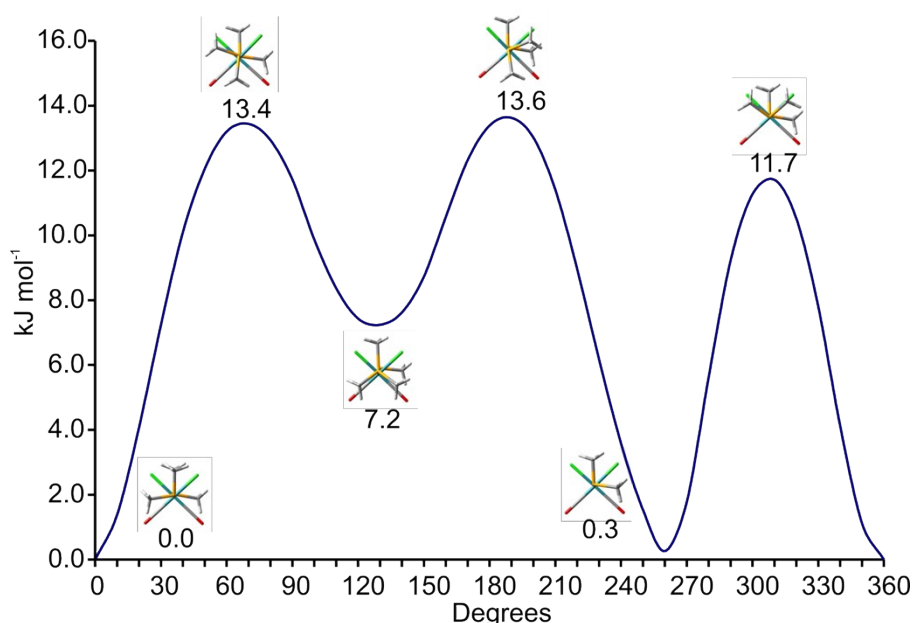

**Fig. S14.** Energy barriers of the rotation of SeMe<sub>2</sub> about the Ru-Se bond in *cct*-[RuCl<sub>2</sub>(CO)<sub>2</sub>(SeMe<sub>2</sub>)<sub>2</sub>].

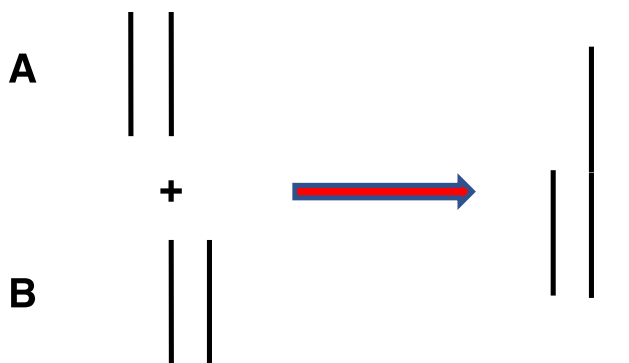

**Fig. S15.** The <sup>13</sup>C{<sup>1</sup>H} NMR resonances of two inequivalent <sup>13</sup>C resonances in the two stereoisomers of *cct*-[RuCl<sub>2</sub>(CO)<sub>2</sub>(EMePh)<sub>2</sub>] (E = Se, Te). The designation of the two stereoisomers **A** and **B** (see Fig. S3) have been chosen arbitrarily.

## 5. Computational Results

**Table S5.** Selected PBE0-D3/def2-TZVP optimized bond lengths of the five isomers of  $[\text{RuCl}_2(\text{CO})_2(\text{ERR}')_2]$  ( $E = \text{S, Se, Te}$ ;  $R, R' = \text{Me, Ph}$ ). Full atomic coordinates of all species are listed in Table S9.

|            | $[\text{RuCl}_2(\text{CO})_2(\text{EMe}_2)_2]$<br>E = S, Se, Te                                                                                                                                                   | $[\text{RuCl}_2(\text{CO})_2(\text{EMePh})_2]$<br>E = S, Se, Te                                                                                                                                                   | $[\text{RuCl}_2(\text{CO})_2(\text{EPh}_2)_2]$<br>E = S, Se, Te                                                                                                                                               |
|------------|-------------------------------------------------------------------------------------------------------------------------------------------------------------------------------------------------------------------|-------------------------------------------------------------------------------------------------------------------------------------------------------------------------------------------------------------------|---------------------------------------------------------------------------------------------------------------------------------------------------------------------------------------------------------------|
| <b>cct</b> | 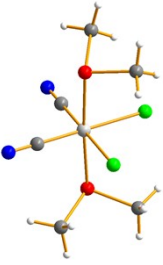 <p>Ru-S: 2.399 Å<br/>Ru-Se: 2.512 Å<br/>Ru-Te: 2.663 Å<br/>Ru-Cl: 2.431-2.444 Å<br/>Ru-C: 1.844-1.852 Å</p>                     |  <p>Ru-S: 2.397 Å<br/>Ru-Se: 2.509 Å<br/>Ru-Te: 2.658 Å<br/>Ru-Cl: 2.433-2.448 Å<br/>Ru-C: 1.845-1.854 Å</p>                     |  <p>Ru-S: 2.395 Å<br/>Ru-Se: 2.500 Å<br/>Ru-Te: 2.643 Å<br/>Ru-Cl: 2.431-2.445 Å<br/>Ru-C: 1.847-1.855 Å</p>               |
| <b>ccc</b> |  <p>Ru-S: 2.381-2.464 Å<br/>Ru-Se: 2.497-2.579 Å<br/>Ru-Te: 2.727 Å<br/>Ru-Cl: 2.405-2.432 Å<br/>Ru-C: 1.844-1.873 Å</p>       |  <p>Ru-S: 2.393-2.465 Å<br/>Ru-Se: 2.504-2.573 Å<br/>Ru-Te: 2.644-2.710 Å<br/>Ru-Cl: 2.397-2.438 Å<br/>Ru-C: 1.843-1.875 Å</p> |  <p>Ru-S: 2.374-2.499 Å<br/>Ru-Se: 2.493-2.590 Å<br/>Ru-Te: 2.663 Å<br/>Ru-Cl: 2.400-2.425 Å<br/>Ru-C: 1.848-1.860 Å</p> |
| <b>tcc</b> |  <p>Ru-S: 2.457-2.471 Å<br/>Ru-Se: 2.572-2.583 Å<br/>Ru-Te: 2.719-2.728 Å<br/>Ru-Cl: 2.393-2.409 Å<br/>Ru-C: 1.855-1.863 Å</p> |  <p>Ru-S: 2.475 Å<br/>Ru-Se: 2.589 Å<br/>Ru-Te: 2.731 Å<br/>Ru-Cl: 2.393-2.401 Å<br/>Ru-C: 1.855-1.861 Å</p>                   |  <p>Ru-S: 2.362 Å<br/>Ru-Se: 2.481 Å<br/>Ru-Te: 2.617 Å<br/>Ru-Cl: 2.406-2.430 Å<br/>Ru-C: 1.924-1.937 Å</p>             |



|                          |                                                                                                                                                                                                   |                                                                                                                                                                                                          |                                                                                                                                                                                                           |
|--------------------------|---------------------------------------------------------------------------------------------------------------------------------------------------------------------------------------------------|----------------------------------------------------------------------------------------------------------------------------------------------------------------------------------------------------------|-----------------------------------------------------------------------------------------------------------------------------------------------------------------------------------------------------------|
| <p><b><i>ttt</i></b></p> | 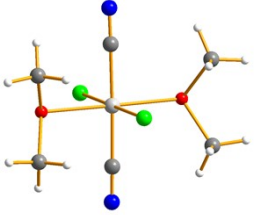 <p>Ru-S: 2.382 Å<br/> Ru-Se: 2.493 Å<br/> Ru-Te: 2.640 Å<br/> Ru-Cl: 2.406-2.418 Å<br/> Ru-C: 1.922-1.926 Å</p> |  <p>Ru-S: 2.382 Å<br/> Ru-Se: 2.494 Å<br/> Ru-Te: 2.641 Å<br/> Ru-Cl: 2.406-2.418 Å<br/> Ru-C: 1.925-1.934 Å</p>        |  <p>Ru-S: 2.382 Å<br/> Ru-Se: 2.494 Å<br/> Ru-Te: 2.640 Å<br/> Ru-Cl: 2.406-2.418 Å<br/> Ru-C: 1.927-1.940 Å</p>       |
| <p><b><i>ctc</i></b></p> |  <p>Ru-S: 2.355 Å<br/> Ru-Se: 2.475 Å<br/> Ru-Te: 2.624 Å<br/> Ru-Cl: 2.419-2.429 Å<br/> Ru-C: 1.924-1.932 Å</p> |  <p>Ru-S: 2.359 Å<br/> Ru-Se: 2.480 Å<br/> Ru-Te: 2.613-2.619 Å<br/> Ru-Cl: 2.417-2.436 Å<br/> Ru-C: 1.927-1.935 Å</p> |  <p>Ru-S: 2.362 Å<br/> Ru-Se: 2.483 Å<br/> Ru-Te: 2.618-2.624 Å<br/> Ru-Cl: 2.419-2.432 Å<br/> Ru-C: 1.925-1.937 Å</p> |

**Table S6.** Energies (kJ mol<sup>-1</sup>) of [RuCl<sub>2</sub>(CO)<sub>2</sub>(ERR')<sub>2</sub>] (E= S, Se, Te; R, R' = Me, Ph) isomers relative to global minimum *cct*-isomer.

|                 | $\Delta E$ |            |            |            | $\Delta H$ |            |            |            | $\Delta G_{298K}$ |            |            |            |
|-----------------|------------|------------|------------|------------|------------|------------|------------|------------|-------------------|------------|------------|------------|
|                 | <i>tcc</i> | <i>ccc</i> | <i>ttt</i> | <i>ctc</i> | <i>tcc</i> | <i>ccc</i> | <i>ttt</i> | <i>ctc</i> | <i>tcc</i>        | <i>ccc</i> | <i>ttt</i> | <i>ctc</i> |
| S               |            |            |            |            |            |            |            |            |                   |            |            |            |
| Me <sub>2</sub> | 31.8       | 17.1       | 66.8       | 64.3       | 31.4       | 16.9       | 66.0       | 62.7       | 26.5              | 15.4       | 63.4       | 58.2       |
| MePh            | 32.6       | 14.1       | 66.3       | 65.4       | 32.2       | 14.8       | 65.3       | 64.4       | 29.8              | 19.5       | 64.3       | 64.3       |
| Ph <sub>2</sub> | 19.0       | 11.8       | 59.9       | 59.3       | 18.0       | 11.6       | 58.2       | 57.8       | 18.4              | 14.3       | 54.9       | 57.9       |
| Se              |            |            |            |            |            |            |            |            |                   |            |            |            |
| Me <sub>2</sub> | 37.5       | 21.4       | 66.3       | 67.8       | 37.4       | 21.2       | 65.1       | 66.6       | 32.3              | 19.0       | 59.4       | 64.2       |
| MePh            | 39.4       | 16.8       | 67.3       | 70.6       | 38.9       | 17.1       | 65.9       | 69.4       | 32.1              | 20.4       | 61.4       | 65.4       |
| Ph <sub>2</sub> | 28.7       | 16.3       | 67.6       | 70.1       | 28.0       | 16.3       | 66.2       | 68.5       | 27.4              | 13.7       | 62.3       | 67.3       |
| Te              |            |            |            |            |            |            |            |            |                   |            |            |            |
| Me <sub>2</sub> | 51.0       | 29.2       | 64.6       | 68.7       | 50.4       | 28.9       | 63.4       | 67.5       | 43.8              | 26.8       | 60.0       | 65.3       |
| MePh            | 55.0       | 24.1       | 67.2       | 73.7       | 54.5       | 24.2       | 66.0       | 72.8       | 53.2              | 26.3       | 63.7       | 71.2       |
| Ph <sub>2</sub> | 44.3       | 17.3       | 73.7       | 66.9       | 43.7       | 17.5       | 72.6       | 65.8       | 46.9              | 21.1       | 70.1       | 69.8       |

**Table S7.** PBE0-D3/def2-TZVP energies (kJ mol<sup>-1</sup>) of total reactions from [RuCl<sub>2</sub>(CO)<sub>3</sub>]<sub>2</sub> to [RuCl<sub>2</sub>(CO)<sub>2</sub>(ER<sub>2</sub>)<sub>2</sub>] (E = S, Se, Te; R<sub>2</sub> = Me<sub>2</sub>, MePh, Ph<sub>2</sub>) in THF.

| Reaction                                                                                                                                                      | $\Delta E$ | $\Delta H$ | $\Delta G_{298K}$ |
|---------------------------------------------------------------------------------------------------------------------------------------------------------------|------------|------------|-------------------|
| [RuCl <sub>2</sub> (CO) <sub>3</sub> ] <sub>2</sub> + 4 SMe <sub>2</sub> ⇌ 2 [RuCl <sub>2</sub> (CO) <sub>2</sub> (SMe <sub>2</sub> ) <sub>2</sub> ] + 2 CO   | -112.1     | -103.6     | -38.8             |
| [RuCl <sub>2</sub> (CO) <sub>3</sub> ] <sub>2</sub> + 4 SMePh ⇌ 2 [RuCl <sub>2</sub> (CO) <sub>2</sub> (SMePh) <sub>2</sub> ] + 2 CO                          | -68.4      | -61.7      | -1.2              |
| [RuCl <sub>2</sub> (CO) <sub>3</sub> ] <sub>2</sub> + 4 SPh <sub>2</sub> ⇌ 2 [RuCl <sub>2</sub> (CO) <sub>2</sub> (SPh <sub>2</sub> ) <sub>2</sub> ] + 2 CO   | -19.3      | -10.8      | +82.1             |
| [RuCl <sub>2</sub> (CO) <sub>3</sub> ] <sub>2</sub> + 4 SeMe <sub>2</sub> ⇌ 2 [RuCl <sub>2</sub> (CO) <sub>2</sub> (SeMe <sub>2</sub> ) <sub>2</sub> ] + 2 CO | -130.7     | -124.6     | -60.3             |
| [RuCl <sub>2</sub> (CO) <sub>3</sub> ] <sub>2</sub> + 4 SeMePh ⇌ 2 [RuCl <sub>2</sub> (CO) <sub>2</sub> (SeMePh) <sub>2</sub> ] + 2 CO                        | -100.1     | -94.7      | -27.1             |
| [RuCl <sub>2</sub> (CO) <sub>3</sub> ] <sub>2</sub> + 4 SePh <sub>2</sub> ⇌ 2 [RuCl <sub>2</sub> (CO) <sub>2</sub> (SePh <sub>2</sub> ) <sub>2</sub> ] + 2 CO | -67.5      | -61.0      | +33.3             |
| [RuCl <sub>2</sub> (CO) <sub>3</sub> ] <sub>2</sub> + 4 TeMe <sub>2</sub> ⇌ 2 [RuCl <sub>2</sub> (CO) <sub>2</sub> (TeMe <sub>2</sub> ) <sub>2</sub> ] + 2 CO | -196.4     | -192.1     | -129.4            |
| [RuCl <sub>2</sub> (CO) <sub>3</sub> ] <sub>2</sub> + 4 TeMePh ⇌ 2 [RuCl <sub>2</sub> (CO) <sub>2</sub> (TeMePh) <sub>2</sub> ] + 2 CO                        | -181.1     | -176.8     | -111.4            |
| [RuCl <sub>2</sub> (CO) <sub>3</sub> ] <sub>2</sub> + 4 TePh <sub>2</sub> ⇌ 2 [RuCl <sub>2</sub> (CO) <sub>2</sub> (TePh <sub>2</sub> ) <sub>2</sub> ] + 2 CO | -165.9     | -160.9     | -85.6             |

**Table S8.** PBE0-D3/def2-TZVP energy changes (kJ mol<sup>-1</sup>) in individual reaction step **I3a,b** → **P** (see Fig. 4) along the reaction coordinate between [RuCl<sub>2</sub>(CO)<sub>3</sub>]<sub>2</sub> and different chalcogenoethers in THF.

| Reaction                                                                                                                                                       | $\Delta E$ | $\Delta H$ | $\Delta G_{298K}$ |
|----------------------------------------------------------------------------------------------------------------------------------------------------------------|------------|------------|-------------------|
| [RuCl <sub>2</sub> (CO) <sub>3</sub> (SMe <sub>2</sub> )] + SMe <sub>2</sub> ⇌ [RuCl <sub>2</sub> (CO) <sub>2</sub> (SMe <sub>2</sub> ) <sub>2</sub> ] + CO    | -0.2       | 0.0        | +9.8              |
| [RuCl <sub>2</sub> (CO) <sub>3</sub> (SMePh)] + SMePh ⇌ [RuCl <sub>2</sub> (CO) <sub>2</sub> (SMePh) <sub>2</sub> ] + CO                                       | +10.8      | +10.6      | +19.0             |
| [RuCl <sub>2</sub> (CO) <sub>3</sub> (SPh <sub>2</sub> )] + SPh <sub>2</sub> ⇌ [RuCl <sub>2</sub> (CO) <sub>2</sub> (SPh <sub>2</sub> ) <sub>2</sub> ] + CO    | +21.9      | +22.0      | +37.8             |
| [RuCl <sub>2</sub> (CO) <sub>3</sub> (SeMe <sub>2</sub> )] + SeMe <sub>2</sub> ⇌ [RuCl <sub>2</sub> (CO) <sub>2</sub> (SeMe <sub>2</sub> ) <sub>2</sub> ] + CO | -5.5       | -5.8       | +4.2              |
| [RuCl <sub>2</sub> (CO) <sub>3</sub> (SeMePh)] + SeMePh ⇌ [RuCl <sub>2</sub> (CO) <sub>2</sub> (SeMePh) <sub>2</sub> ] + CO                                    | +1.8       | +1.4       | +14.0             |
| [RuCl <sub>2</sub> (CO) <sub>3</sub> (SePh <sub>2</sub> )] + SePh <sub>2</sub> ⇌ [RuCl <sub>2</sub> (CO) <sub>2</sub> (SePh <sub>2</sub> ) <sub>2</sub> ] + CO | +8.8       | +8.3       | +24.0             |
| [RuCl <sub>2</sub> (CO) <sub>3</sub> (TeMe <sub>2</sub> )] + TeMe <sub>2</sub> ⇌ [RuCl <sub>2</sub> (CO) <sub>2</sub> (TeMe <sub>2</sub> ) <sub>2</sub> ] + CO | -24.8      | -25.5      | -15.7             |
| [RuCl <sub>2</sub> (CO) <sub>3</sub> (TeMePh)] + TeMePh ⇌ [RuCl <sub>2</sub> (CO) <sub>2</sub> (TeMePh) <sub>2</sub> ] + CO                                    | -22.2      | -22.9      | -12.5             |
| [RuCl <sub>2</sub> (CO) <sub>3</sub> (TePh <sub>2</sub> )] + TePh <sub>2</sub> ⇌ [RuCl <sub>2</sub> (CO) <sub>2</sub> (TePh <sub>2</sub> ) <sub>2</sub> ] + CO | -18.9      | -19.4      | -7.9              |

**Table S9.** Total energies (a.u.) and optimized Cartesian coordinates (in Å) of the computed species.

9  
SMe2 symmetry c2v (E= -477.821796008)

|   |              |              |              |
|---|--------------|--------------|--------------|
| S | 0.000000000  | 0.000000000  | 0.652220000  |
| C | 0.000000000  | 1.373724000  | -0.505474000 |
| H | -0.892318000 | 1.354082000  | -1.133234000 |
| H | 0.000000000  | 2.292361000  | 0.081557000  |
| H | 0.892318000  | 1.354082000  | -1.133234000 |
| H | 0.892318000  | -1.354082000 | -1.133234000 |
| C | 0.000000000  | -1.373724000 | -0.505474000 |
| H | -0.892318000 | -1.354082000 | -1.133234000 |
| H | 0.000000000  | -2.292361000 | 0.081557000  |

16  
SMePh symmetry cs (E=-669.411295006)

|   |              |              |              |
|---|--------------|--------------|--------------|
| S | 1.882886120  | -0.421813406 | 0.000000000  |
| H | 2.243210416  | 1.791509680  | 0.894868000  |
| C | 2.540727328  | 1.244349164  | 0.000000000  |
| H | 2.243210416  | 1.791509680  | -0.894868000 |
| H | 3.624606408  | 1.129908701  | 0.000000000  |
| C | 0.144135593  | -0.180072601 | 0.000000000  |
| C | -0.648220743 | -1.331243199 | 0.000000000  |
| C | -0.472018081 | 1.068695422  | 0.000000000  |
| C | -2.027755776 | -1.229760417 | 0.000000000  |
| C | -1.858107565 | 1.158752611  | 0.000000000  |
| C | -2.643102005 | 0.016819838  | 0.000000000  |
| H | -0.176344480 | -2.308098493 | 0.000000000  |
| H | 0.116695743  | 1.976381362  | 0.000000000  |
| H | -2.627291102 | -2.133003908 | 0.000000000  |
| H | -2.323197216 | 2.138174296  | 0.000000000  |
| H | -3.723688617 | 0.094315139  | 0.000000000  |

23  
SPh2 symmetry c2 (E=-860.998167289)

|   |              |              |              |
|---|--------------|--------------|--------------|
| S | 0.000000000  | 0.000000000  | -1.580434996 |
| C | -1.386041556 | -0.017470716 | -0.485957935 |
| C | -2.475741637 | -0.814509896 | -0.822654095 |
| C | -1.442346117 | 0.788863937  | 0.648700020  |
| C | -3.616821555 | -0.798990720 | -0.032734874 |
| C | -2.575797687 | 0.781028288  | 1.444133688  |
| C | -3.668665913 | -0.007850911 | 1.104981460  |
| H | -2.425163070 | -1.450784496 | -1.698678931 |
| H | -0.598013837 | 1.416003766  | 0.908458500  |
| H | -4.461863878 | -1.421560218 | -0.303073765 |
| H | -2.610011350 | 1.405139869  | 2.329782747  |
| H | -4.555454548 | -0.005608946 | 1.727587544  |
| C | 1.386041556  | 0.017470716  | -0.485957935 |
| C | 1.442346117  | -0.788863937 | 0.648700020  |
| C | 2.475741637  | 0.814509896  | -0.822654095 |
| C | 2.575797687  | -0.781028288 | 1.444133688  |
| C | 3.616821555  | 0.798990720  | -0.032734874 |
| C | 3.668665913  | 0.007850911  | 1.104981460  |
| H | 0.598013837  | -1.416003766 | 0.908458500  |
| H | 2.425163070  | 1.450784496  | -1.698678931 |
| H | 2.610011350  | -1.405139869 | 2.329782747  |
| H | 4.461863878  | 1.421560218  | -0.303073765 |
| H | 4.555454548  | 0.005608946  | 1.727587544  |

9  
SeMe2 symmetry c2v (E=-2481.02501944)

|    |              |              |              |
|----|--------------|--------------|--------------|
| Se | 0.000000000  | 0.000000000  | 0.470448000  |
| C  | 0.000000000  | 1.454750000  | -0.814003000 |
| H  | -0.894208000 | 1.406015000  | -1.433757000 |
| H  | 0.000000000  | 2.384050000  | -0.246083000 |
| H  | 0.894208000  | 1.406015000  | -1.433757000 |
| H  | 0.894208000  | -1.406015000 | -1.433757000 |
| C  | 0.000000000  | -1.454750000 | -0.814003000 |
| H  | -0.894208000 | -1.406015000 | -1.433757000 |
| H  | 0.000000000  | -2.384050000 | -0.246083000 |

16

SeMePh symmetry cs (E=-2672.61204693)

|    |              |              |              |
|----|--------------|--------------|--------------|
| Se | 1.463328845  | -0.055423494 | 0.000000000  |
| H  | 1.291961262  | 2.307821547  | 0.896725094  |
| C  | 1.719395471  | 1.862914878  | 0.000000000  |
| H  | 1.291961262  | 2.307821547  | -0.896725094 |
| H  | 2.798386988  | 2.011097992  | 0.000000000  |
| C  | -0.438345809 | -0.158267665 | 0.000000000  |
| C  | -1.002658399 | -1.433642040 | 0.000000000  |
| C  | -1.267018356 | 0.958117558  | 0.000000000  |
| C  | -2.379023145 | -1.585396964 | 0.000000000  |
| C  | -2.646772380 | 0.795649837  | 0.000000000  |
| C  | -3.209520947 | -0.471163582 | 0.000000000  |
| H  | -0.364053506 | -2.310722359 | 0.000000000  |
| H  | -0.852206332 | 1.957690292  | 0.000000000  |
| H  | -2.805037088 | -2.582301110 | 0.000000000  |
| H  | -3.282987804 | 1.673602089  | 0.000000000  |
| H  | -4.286242363 | -0.591654114 | 0.000000000  |

23

SePh2 symmetry c1 (E=-2864.19773321)

|    |              |              |              |
|----|--------------|--------------|--------------|
| Se | 0.042719000  | -1.493750000 | -0.021935000 |
| C  | 1.463556000  | -0.215824000 | 0.053795000  |
| C  | 2.705707000  | -0.602082000 | -0.439063000 |
| C  | 1.301758000  | 1.042897000  | 0.621794000  |
| C  | 3.783186000  | 0.268287000  | -0.356770000 |
| C  | 2.380425000  | 1.912255000  | 0.684628000  |
| C  | 3.624236000  | 1.529205000  | 0.200308000  |
| H  | 2.831953000  | -1.578232000 | -0.894328000 |
| H  | 0.337334000  | 1.346396000  | 1.010693000  |
| H  | 4.748092000  | -0.039819000 | -0.743006000 |
| H  | 2.246919000  | 2.894633000  | 1.123443000  |
| H  | 4.464195000  | 2.211462000  | 0.255110000  |
| C  | -1.459588000 | -0.312291000 | -0.067693000 |
| C  | -2.432156000 | -0.413922000 | 0.919108000  |
| C  | -1.605302000 | 0.609122000  | -1.100305000 |
| C  | -3.553973000 | 0.404008000  | 0.869623000  |
| C  | -2.716330000 | 1.436511000  | -1.132085000 |
| C  | -3.694881000 | 1.332191000  | -0.150705000 |
| H  | -2.309430000 | -1.124172000 | 1.728119000  |
| H  | -0.848958000 | 0.680288000  | -1.873138000 |
| H  | -4.312169000 | 0.320509000  | 1.639633000  |
| H  | -2.824016000 | 2.158560000  | -1.933295000 |
| H  | -4.566192000 | 1.975726000  | -0.183257000 |

9

TeMe2 symmetry c2v (E=-347.787073890)

|    |              |             |              |
|----|--------------|-------------|--------------|
| Te | 0.000000000  | 0.000000000 | 0.391545000  |
| C  | 0.000000000  | 1.570486000 | -1.055268000 |
| H  | -0.895304000 | 1.499424000 | -1.669441000 |
| H  | 0.000000000  | 2.513027000 | -0.509683000 |
| H  | 0.895304000  | 1.499424000 | -1.669441000 |

|   |              |              |              |
|---|--------------|--------------|--------------|
| H | 0.895304000  | -1.499424000 | -1.669441000 |
| C | 0.000000000  | -1.570486000 | -1.055268000 |
| H | -0.895304000 | -1.499424000 | -1.669441000 |
| H | 0.000000000  | -2.513027000 | -0.509683000 |

16

TeMePh symmetry cs (E=-539.372008116)

|    |              |              |              |
|----|--------------|--------------|--------------|
| Te | -1.198571956 | -0.190627981 | 0.000000000  |
| H  | -1.166787606 | 2.359251967  | -0.897637004 |
| C  | -1.579688959 | 1.904306835  | 0.000000000  |
| H  | -1.166787606 | 2.359251967  | 0.897637004  |
| H  | -2.663771849 | 2.009547711  | 0.000000000  |
| C  | 0.904291353  | -0.078402825 | 0.000000000  |
| C  | 1.590941229  | 1.131168200  | 0.000000000  |
| C  | 1.621912057  | -1.273577197 | 0.000000000  |
| C  | 2.980149356  | 1.141729274  | 0.000000000  |
| C  | 3.007975364  | -1.255147931 | 0.000000000  |
| C  | 3.693929504  | -0.047273274 | 0.000000000  |
| H  | 1.056917804  | 2.073371438  | 0.000000000  |
| H  | 1.102647365  | -2.226503810 | 0.000000000  |
| H  | 3.504145179  | 2.091063928  | 0.000000000  |
| H  | 3.554209498  | -2.191741307 | 0.000000000  |
| H  | 4.777426562  | -0.034418582 | 0.000000000  |

23

TePh2 symmetry c1 (E=-730.956694172)

|    |              |              |              |
|----|--------------|--------------|--------------|
| Te | -0.087350000 | -1.439450000 | -0.000080000 |
| C  | -1.558415000 | 0.077494000  | 0.000083000  |
| C  | -1.232264000 | 1.428521000  | 0.000447000  |
| C  | -2.896018000 | -0.310314000 | -0.000223000 |
| C  | -2.240816000 | 2.383207000  | 0.000568000  |
| C  | -3.897222000 | 0.649549000  | -0.000124000 |
| C  | -3.574220000 | 2.000048000  | 0.000298000  |
| H  | -0.195503000 | 1.743529000  | 0.000625000  |
| H  | -3.166414000 | -1.361173000 | -0.000558000 |
| H  | -1.976957000 | 3.434997000  | 0.000848000  |
| H  | -4.935581000 | 0.337456000  | -0.000345000 |
| H  | -4.357754000 | 2.748557000  | 0.000415000  |
| C  | 1.579609000  | -0.150103000 | -0.000061000 |
| C  | 2.129975000  | 0.278024000  | 1.204475000  |
| C  | 2.129080000  | 0.279142000  | -1.204622000 |
| C  | 3.220303000  | 1.137265000  | 1.201796000  |
| C  | 3.219399000  | 1.138386000  | -1.201960000 |
| C  | 3.764540000  | 1.567833000  | -0.000084000 |
| H  | 1.704835000  | -0.054552000 | 2.144009000  |
| H  | 1.703223000  | -0.052565000 | -2.144136000 |
| H  | 3.644156000  | 1.470132000  | 2.142268000  |
| H  | 3.642562000  | 1.472142000  | -2.142428000 |
| H  | 4.615914000  | 2.238571000  | -0.000098000 |

2

CO symmetry C<sub>in</sub>fv (E=-113.231880415)

|   |             |             |              |
|---|-------------|-------------|--------------|
| C | 0.000000000 | 0.000000000 | 0.641707339  |
| O | 0.000000000 | 0.000000000 | -0.481433661 |

13

THF symmetry c<sub>2</sub> (E=-232.276490524)

|   |              |              |              |
|---|--------------|--------------|--------------|
| H | -1.574349000 | -1.091336000 | 0.469083000  |
| O | 0.000000000  | 0.000000000  | 1.243302000  |
| C | 0.478128000  | 1.063689000  | 0.423711000  |
| C | 0.000000000  | 0.761706000  | -0.986037000 |
| C | 0.000000000  | -0.761706000 | -0.986037000 |
| C | -0.478128000 | -1.063689000 | 0.423711000  |
| H | 0.094632000  | 2.009464000  | 0.815175000  |
| H | 1.574349000  | 1.091336000  | 0.469083000  |
| H | 0.645406000  | 1.198158000  | -1.748875000 |
| H | -1.014297000 | 1.141489000  | -1.134633000 |
| H | 1.014297000  | -1.141489000 | -1.134633000 |
| H | -0.645406000 | -1.198158000 | -1.748875000 |
| H | -0.094632000 | -2.009464000 | 0.815175000  |

18

[Ru<sub>2</sub>Cl<sub>4</sub>(CO)<sub>6</sub>] symmetry c<sub>2</sub>h (E=-2710.01276904)

|    |              |              |              |
|----|--------------|--------------|--------------|
| Ru | 0.053592000  | 1.805601000  | 0.000000000  |
| Cl | 0.000000000  | 0.000000000  | 1.654308000  |
| Cl | 0.000000000  | 0.000000000  | -1.654308000 |
| Cl | -2.331049000 | 1.813817000  | 0.000000000  |
| C  | 1.955393000  | 1.739280000  | 0.000000000  |
| O  | 3.083622000  | 1.727078000  | 0.000000000  |
| C  | 0.000000000  | 3.119878000  | -1.339052000 |
| O  | -0.054729000 | 3.903792000  | -2.149344000 |
| O  | -0.054729000 | 3.903792000  | 2.149344000  |
| C  | 0.000000000  | 3.119878000  | 1.339052000  |
| Ru | -0.053592000 | -1.805601000 | 0.000000000  |
| Cl | 2.331049000  | -1.813817000 | 0.000000000  |
| C  | 0.000000000  | -3.119878000 | -1.339052000 |
| C  | 0.000000000  | -3.119878000 | 1.339052000  |
| C  | -1.955393000 | -1.739280000 | 0.000000000  |
| O  | 0.054729000  | -3.903792000 | -2.149344000 |
| O  | 0.054729000  | -3.903792000 | 2.149344000  |
| O  | -3.083622000 | -1.727078000 | 0.000000000  |

18

I1b [Cl<sub>2</sub>(CO)<sub>3</sub>Ru-Cl-RuCl(CO)<sub>3</sub>] symmetry c<sub>1</sub> (E=-2709.98550407)

|    |              |              |              |
|----|--------------|--------------|--------------|
| Ru | -2.001086000 | -0.121120000 | 0.005353000  |
| Cl | -1.567455000 | 1.416636000  | -1.780609000 |
| Cl | 0.129650000  | -1.244018000 | -0.504877000 |
| Cl | -0.901309000 | 1.321133000  | 1.578149000  |
| C  | -2.834083000 | -1.236051000 | -1.271788000 |
| O  | -3.333042000 | -1.891739000 | -2.045405000 |
| C  | -2.261068000 | -1.321076000 | 1.443491000  |
| O  | -2.404768000 | -2.025121000 | 2.315868000  |
| O  | -4.543624000 | 1.360821000  | 0.576375000  |
| C  | -3.594050000 | 0.787156000  | 0.363292000  |
| Ru | 2.188825000  | -0.014734000 | -0.295649000 |
| Cl | 3.234088000  | -2.111357000 | -0.381705000 |
| C  | 2.103099000  | 0.064631000  | 1.521318000  |
| C  | 3.931094000  | 0.715825000  | -0.214049000 |
| C  | 1.441968000  | 1.762453000  | -0.423942000 |
| O  | 2.092320000  | 0.059626000  | 2.651351000  |
| O  | 4.980167000  | 1.121156000  | -0.136963000 |
| O  | 1.184340000  | 2.855161000  | -0.514122000 |

31

I1a [Cl<sub>2</sub>(CO)<sub>3</sub>Ru-Cl-RuCl(CO)<sub>3</sub>(THF)] symmetry c1 (E=-2942.29932941)

|    |              |              |              |
|----|--------------|--------------|--------------|
| Ru | 2.038211000  | -0.559364000 | 0.116728000  |
| Cl | -2.367568000 | 1.702487000  | 1.475043000  |
| Cl | -0.146677000 | -0.850189000 | 1.127932000  |
| Cl | 1.135811000  | -0.796602000 | -2.071445000 |
| C  | 2.742749000  | -0.375365000 | 1.872979000  |
| O  | 3.168960000  | -0.294178000 | 2.915267000  |
| C  | 2.268530000  | -2.418607000 | 0.152492000  |
| O  | 2.381397000  | -3.540676000 | 0.156079000  |
| O  | 4.741768000  | -0.250045000 | -1.177462000 |
| C  | 3.732087000  | -0.349335000 | -0.682624000 |
| Ru | -2.198319000 | -0.135869000 | -0.066383000 |
| Cl | -3.336465000 | -1.577222000 | 1.483306000  |
| C  | -2.046538000 | -1.621531000 | -1.224234000 |
| C  | -3.871472000 | 0.324438000  | -0.736067000 |
| C  | -1.364981000 | 1.072030000  | -1.256150000 |
| O  | -1.986722000 | -2.525305000 | -1.900538000 |
| O  | -4.899753000 | 0.602521000  | -1.115065000 |
| O  | -0.965989000 | 1.850608000  | -1.973820000 |
| H  | 1.939233000  | 1.938334000  | -1.978324000 |
| O  | 1.545595000  | 1.519257000  | -0.017183000 |
| C  | 1.311969000  | 2.332899000  | 1.154797000  |
| C  | 0.803009000  | 3.633384000  | 0.578294000  |
| C  | 1.518070000  | 3.751347000  | -0.779145000 |
| C  | 2.149120000  | 2.382529000  | -1.008268000 |
| H  | 0.587402000  | 1.807181000  | 1.772857000  |
| H  | 2.259788000  | 2.457542000  | 1.688435000  |
| H  | 1.020568000  | 4.470751000  | 1.240229000  |
| H  | -0.277485000 | 3.572805000  | 0.448222000  |
| H  | 2.289579000  | 4.520398000  | -0.763906000 |
| H  | 0.813067000  | 3.997589000  | -1.571335000 |
| H  | 3.228540000  | 2.403446000  | -0.834222000 |

22

I2a [RuCl<sub>2</sub>(CO)<sub>3</sub>(THF)] symmetry c1 (E=-1587.28795185)

|    |              |              |              |
|----|--------------|--------------|--------------|
| Ru | -0.631932000 | 0.029269000  | 0.086137000  |
| Cl | -0.275869000 | 1.250456000  | -1.940966000 |
| Cl | -0.653088000 | -2.030618000 | -1.136591000 |
| C  | -0.658330000 | 1.679914000  | 1.007082000  |
| O  | -0.712242000 | 2.673826000  | 1.544569000  |
| C  | -2.469430000 | 0.105972000  | -0.196340000 |
| O  | -3.580021000 | 0.144216000  | -0.402028000 |
| O  | -0.976236000 | -1.623847000 | 2.592465000  |
| C  | -0.845132000 | -0.997904000 | 1.660138000  |
| H  | 2.165426000  | -1.355491000 | -1.226684000 |
| O  | 1.516757000  | -0.089325000 | 0.282198000  |
| C  | 2.329071000  | 1.111968000  | 0.345734000  |
| C  | 3.700898000  | 0.692242000  | -0.140323000 |
| C  | 3.728162000  | -0.797969000 | 0.175250000  |
| C  | 2.315992000  | -1.213202000 | -0.155004000 |
| H  | 1.864702000  | 1.871809000  | -0.281515000 |
| H  | 2.336321000  | 1.436556000  | 1.388880000  |
| H  | 4.493027000  | 1.252728000  | 0.355078000  |
| H  | 3.785341000  | 0.852240000  | -1.217206000 |
| H  | 3.938278000  | -0.966970000 | 1.233992000  |
| H  | 4.459504000  | -1.346977000 | -0.417449000 |
| H  | 1.961226000  | -2.094045000 | 0.376505000  |

27

I2b [Cl<sub>2</sub>(CO)<sub>3</sub>Ru-Cl-RuCl(CO)<sub>3</sub>(SMe<sub>2</sub>)] symmetry c1 (E=-3187.86206413)



|    |              |              |              |
|----|--------------|--------------|--------------|
| Ru | -1.855228000 | -0.451894000 | -0.010084000 |
| Cl | 1.305780000  | 1.393929000  | -1.650792000 |
| Cl | 0.172072000  | 0.077881000  | 1.267019000  |
| Cl | -2.965601000 | -0.044787000 | 2.079239000  |
| C  | -1.090771000 | -0.724817000 | -1.735612000 |
| O  | -0.821788000 | -0.909857000 | -2.816485000 |
| C  | -1.536341000 | -2.263127000 | 0.515738000  |
| O  | -1.350378000 | -3.323117000 | 0.849068000  |
| O  | -4.560958000 | -1.161202000 | -1.084903000 |
| C  | -3.533550000 | -0.882881000 | -0.701514000 |
| Ru | 2.320029000  | 0.085236000  | 0.092182000  |
| Cl | 1.712438000  | -1.974040000 | -0.986311000 |
| C  | 3.049042000  | -0.982241000 | 1.468143000  |
| C  | 3.920063000  | 0.076998000  | -0.877282000 |
| C  | 2.741930000  | 1.720471000  | 0.933303000  |
| O  | 3.478224000  | -1.635473000 | 2.284787000  |
| O  | 4.871760000  | 0.066166000  | -1.486488000 |
| O  | 2.985547000  | 2.708958000  | 1.425691000  |
| S  | -2.156294000 | 1.900857000  | -0.641352000 |
| C  | -1.381353000 | 2.887639000  | 0.635103000  |
| C  | -3.880103000 | 2.285554000  | -0.325973000 |
| H  | -0.306942000 | 2.797130000  | 0.497921000  |
| H  | -1.691403000 | 3.920262000  | 0.475848000  |
| H  | -1.678884000 | 2.533524000  | 1.620642000  |
| H  | -4.477131000 | 1.782694000  | -1.085407000 |
| H  | -4.165507000 | 1.952631000  | 0.670691000  |
| H  | -4.003165000 | 3.362939000  | -0.430820000 |

27

I2b [Cl<sub>2</sub>(CO)<sub>3</sub>Ru-Cl-RuCl(CO)<sub>3</sub>(SeMe<sub>2</sub>)] symmetry c1 (E=-5191.06751005)

|    |              |              |              |
|----|--------------|--------------|--------------|
| Ru | -1.680790000 | -0.718076000 | 0.002787000  |
| Cl | 1.292743000  | 1.469237000  | -1.517309000 |
| Cl | 0.334623000  | -0.172366000 | 1.294867000  |
| Cl | -2.782246000 | -0.505520000 | 2.127621000  |
| C  | -0.926969000 | -0.835007000 | -1.741303000 |
| O  | -0.658877000 | -0.934078000 | -2.834236000 |
| C  | -1.282210000 | -2.547009000 | 0.400464000  |
| O  | -1.046054000 | -3.619818000 | 0.651990000  |
| O  | -4.374910000 | -1.420762000 | -1.101861000 |
| C  | -3.350392000 | -1.148558000 | -0.705303000 |
| Ru | 2.449100000  | 0.112014000  | 0.097022000  |
| Cl | 1.993313000  | -1.897539000 | -1.137919000 |
| C  | 3.293183000  | -0.997965000 | 1.369083000  |
| C  | 4.023589000  | 0.315593000  | -0.893553000 |
| C  | 2.751161000  | 1.702171000  | 1.066228000  |
| O  | 3.792373000  | -1.676498000 | 2.122860000  |
| O  | 4.959531000  | 0.432344000  | -1.515912000 |
| O  | 2.921212000  | 2.663553000  | 1.637134000  |
| Se | -2.101543000 | 1.770513000  | -0.483539000 |
| C  | -1.349864000 | 2.673400000  | 1.049221000  |
| C  | -3.964034000 | 2.009649000  | -0.006941000 |
| H  | -0.273363000 | 2.690681000  | 0.907260000  |
| H  | -1.753874000 | 3.684262000  | 1.044643000  |
| H  | -1.622520000 | 2.133324000  | 1.952803000  |
| H  | -4.566187000 | 1.572664000  | -0.801053000 |
| H  | -4.155945000 | 1.521067000  | 0.945901000  |
| H  | -4.147631000 | 3.080924000  | 0.048557000  |

27

I2b [Cl<sub>2</sub>(CO)<sub>3</sub>Ru-Cl-RuCl(CO)<sub>3</sub>(TeMe<sub>2</sub>)] symmetry c1 (E=-3057.83632789)

|    |              |              |              |
|----|--------------|--------------|--------------|
| Ru | 1.517856000  | 0.973216000  | 0.002010000  |
| Cl | -1.272492000 | -1.499364000 | -1.413575000 |

|    |              |              |              |
|----|--------------|--------------|--------------|
| Cl | -0.500840000 | 0.411665000  | 1.293654000  |
| Cl | 2.602222000  | 0.850527000  | 2.149447000  |
| C  | 0.779179000  | 1.008691000  | -1.745442000 |
| O  | 0.502669000  | 1.059811000  | -2.840729000 |
| C  | 1.082621000  | 2.815946000  | 0.346298000  |
| O  | 0.826513000  | 3.893568000  | 0.554820000  |
| O  | 4.219931000  | 1.642566000  | -1.098346000 |
| C  | 3.190262000  | 1.384570000  | -0.702693000 |
| Ru | -2.563013000 | -0.142548000 | 0.101799000  |
| Cl | -2.275561000 | 1.810081000  | -1.264367000 |
| C  | -3.517408000 | 0.973865000  | 1.285983000  |
| C  | -4.101458000 | -0.552716000 | -0.882690000 |
| C  | -2.738640000 | -1.680621000 | 1.179972000  |
| O  | -4.083734000 | 1.657312000  | 1.985722000  |
| O  | -5.015802000 | -0.794664000 | -1.500954000 |
| O  | -2.833327000 | -2.609923000 | 1.817819000  |
| Te | 2.022912000  | -1.673490000 | -0.412783000 |
| C  | 1.252897000  | -2.486905000 | 1.382194000  |
| C  | 4.045975000  | -1.768228000 | 0.234231000  |
| H  | 0.180566000  | -2.598566000 | 1.252310000  |
| H  | 1.728361000  | -3.456594000 | 1.517923000  |
| H  | 1.487279000  | -1.803150000 | 2.194558000  |
| H  | 4.673729000  | -1.369763000 | -0.560588000 |
| H  | 4.144294000  | -1.180296000 | 1.144341000  |
| H  | 4.284105000  | -2.816014000 | 0.407078000  |

18

I3a,b [RuCl<sub>2</sub>(CO)<sub>3</sub>(SMe<sub>2</sub>)] symmetry c1 (E=-1832.84944921)

|    |              |              |              |
|----|--------------|--------------|--------------|
| Ru | -0.404972000 | 0.083578000  | 0.073302000  |
| C  | -0.962351000 | -0.253441000 | 1.841035000  |
| O  | -1.299024000 | -0.469660000 | 2.899592000  |
| C  | -0.249226000 | 1.939938000  | 0.332073000  |
| O  | -0.175746000 | 3.061870000  | 0.468527000  |
| Cl | 0.348953000  | 0.444777000  | -2.187208000 |
| Cl | -0.624251000 | -2.286342000 | -0.316426000 |
| S  | 1.918201000  | -0.294981000 | 0.767463000  |
| C  | 2.612364000  | -1.469061000 | -0.392880000 |
| H  | 2.443747000  | -1.123517000 | -1.411321000 |
| H  | 3.675337000  | -1.557848000 | -0.169825000 |
| H  | 2.108472000  | -2.418322000 | -0.230526000 |
| C  | 2.834661000  | 1.173600000  | 0.297468000  |
| H  | 2.610447000  | 1.435852000  | -0.735952000 |
| H  | 2.548172000  | 1.979124000  | 0.971739000  |
| H  | 3.895965000  | 0.961862000  | 0.422746000  |
| C  | -2.192946000 | 0.242542000  | -0.566459000 |
| O  | -3.241420000 | 0.316569000  | -0.975270000 |

25

I3a,b [RuCl<sub>2</sub>(CO)<sub>3</sub>(SMePh)] symmetry c1 (E=-2024.43484035)

|    |              |              |              |
|----|--------------|--------------|--------------|
| Ru | 1.077493000  | -0.247641000 | -0.004536000 |
| C  | -0.140428000 | -1.582139000 | 0.532800000  |
| O  | -0.861929000 | -2.385207000 | 0.871803000  |
| C  | 1.345686000  | -0.989279000 | -1.714713000 |
| O  | 1.516096000  | -1.427714000 | -2.744138000 |
| Cl | 2.583172000  | 1.518936000  | -0.645937000 |
| Cl | 0.761921000  | 0.743431000  | 2.170903000  |
| C  | 2.557457000  | -1.179941000 | 0.741779000  |
| O  | 3.445602000  | -1.703613000 | 1.199538000  |
| S  | -0.696703000 | 1.148289000  | -0.974531000 |
| H  | -0.572700000 | 2.642569000  | 0.907266000  |
| C  | -0.619519000 | 2.748773000  | -0.173341000 |
| H  | -1.491346000 | 3.317565000  | -0.492685000 |

|   |              |              |              |
|---|--------------|--------------|--------------|
| H | 0.295761000  | 3.213678000  | -0.534946000 |
| C | -2.244767000 | 0.486283000  | -0.418402000 |
| C | -2.979013000 | -0.241254000 | -1.346610000 |
| C | -2.694813000 | 0.638179000  | 0.887228000  |
| C | -4.172922000 | -0.831065000 | -0.959591000 |
| C | -3.896169000 | 0.055892000  | 1.258247000  |
| C | -4.633385000 | -0.680474000 | 0.340181000  |
| H | -2.617061000 | -0.344429000 | -2.362855000 |
| H | -2.106393000 | 1.183364000  | 1.613508000  |
| H | -4.746493000 | -1.401645000 | -1.680070000 |
| H | -4.252590000 | 0.171878000  | 2.274781000  |
| H | -5.569113000 | -1.137216000 | 0.639568000  |

32

I3a,b [RuCl<sub>2</sub>(CO)<sub>3</sub>(SPh<sub>2</sub>)] symmetry c1 (E=-2216.01656021)

|    |              |              |              |
|----|--------------|--------------|--------------|
| Ru | 1.459393000  | -0.079146000 | 0.144593000  |
| C  | 1.114754000  | 1.391103000  | 1.272929000  |
| O  | 0.960757000  | 2.287673000  | 1.945271000  |
| C  | 1.006741000  | -1.337784000 | 1.472484000  |
| O  | 0.756314000  | -2.081612000 | 2.288164000  |
| Cl | 1.977044000  | -1.871490000 | -1.381184000 |
| Cl | 1.989340000  | 1.538422000  | -1.558223000 |
| C  | 3.293187000  | -0.101655000 | 0.633638000  |
| O  | 4.390908000  | -0.122369000 | 0.891836000  |
| S  | -0.753706000 | -0.029645000 | -0.921983000 |
| C  | -1.842584000 | -1.344823000 | -0.409326000 |
| C  | -1.319288000 | -2.627787000 | -0.302769000 |
| C  | -3.205282000 | -1.122120000 | -0.253657000 |
| C  | -2.163695000 | -3.685000000 | -0.003218000 |
| C  | -4.037991000 | -2.189214000 | 0.047007000  |
| C  | -3.521952000 | -3.469840000 | 0.179355000  |
| H  | -0.263746000 | -2.803233000 | -0.472911000 |
| H  | -3.620053000 | -0.129012000 | -0.362194000 |
| H  | -1.751285000 | -4.682919000 | 0.085853000  |
| H  | -5.099019000 | -2.011713000 | 0.176152000  |
| H  | -4.177616000 | -4.298691000 | 0.417416000  |
| C  | -1.574251000 | 1.438781000  | -0.362310000 |
| C  | -2.052236000 | 1.576868000  | 0.936498000  |
| C  | -1.675723000 | 2.479082000  | -1.275328000 |
| C  | -2.642711000 | 2.769084000  | 1.315675000  |
| C  | -2.256494000 | 3.675891000  | -0.879171000 |
| C  | -2.741583000 | 3.819885000  | 0.411071000  |
| H  | -1.969971000 | 0.759833000  | 1.642948000  |
| H  | -1.297785000 | 2.353226000  | -2.282062000 |
| H  | -3.019678000 | 2.881226000  | 2.325040000  |
| H  | -2.333041000 | 4.492672000  | -1.586452000 |
| H  | -3.199521000 | 4.753106000  | 0.716339000  |

18

I3a,b [RuCl<sub>2</sub>(CO)<sub>3</sub>(SeMe<sub>2</sub>)] symmetry c1 (E=-3836.05421065)

|    |              |              |              |
|----|--------------|--------------|--------------|
| Ru | -0.644973000 | 0.076679000  | 0.069035000  |
| C  | -1.004829000 | -0.406729000 | 1.851143000  |
| O  | -1.225233000 | -0.710167000 | 2.919529000  |
| C  | -0.549271000 | 1.914306000  | 0.448330000  |
| O  | -0.502273000 | 3.025856000  | 0.663105000  |
| Cl | -0.140642000 | 0.633496000  | -2.223774000 |
| Cl | -0.732599000 | -2.275870000 | -0.461658000 |
| Se | 1.860644000  | -0.220842000 | 0.533318000  |
| C  | 2.471105000  | -1.288201000 | -0.956835000 |
| H  | 2.089796000  | -0.850294000 | -1.876293000 |
| H  | 3.559091000  | -1.287971000 | -0.921708000 |
| H  | 2.074397000  | -2.289034000 | -0.813497000 |

|   |              |             |              |
|---|--------------|-------------|--------------|
| C | 2.636083000  | 1.455795000 | -0.045772000 |
| H | 2.215889000  | 1.718152000 | -1.014875000 |
| H | 2.399771000  | 2.208754000 | 0.703092000  |
| H | 3.713571000  | 1.315704000 | -0.104716000 |
| C | -2.492887000 | 0.167738000 | -0.393756000 |
| O | -3.578954000 | 0.207103000 | -0.696217000 |

25

I3a,b [RuCl<sub>2</sub>(CO)<sub>3</sub>(SeMePh)] symmetry c1 (E=-4027.63818258)

|    |              |              |              |
|----|--------------|--------------|--------------|
| Ru | -1.201175000 | -0.318349000 | 0.116710000  |
| C  | -0.033569000 | -1.769415000 | 0.393033000  |
| O  | 0.664976000  | -2.646663000 | 0.547883000  |
| C  | -1.528213000 | -0.062420000 | 1.950939000  |
| O  | -1.738166000 | 0.096777000  | 3.052150000  |
| Cl | -2.602325000 | 1.599208000  | -0.298236000 |
| Cl | -0.820487000 | -0.606526000 | -2.250941000 |
| C  | -2.716357000 | -1.450375000 | -0.104295000 |
| O  | -3.620801000 | -2.106203000 | -0.261622000 |
| Se | 0.695271000  | 1.401264000  | 0.306130000  |
| H  | 0.584612000  | 1.624988000  | -2.198966000 |
| C  | 0.661653000  | 2.338165000  | -1.383437000 |
| H  | 1.570320000  | 2.934145000  | -1.433516000 |
| H  | -0.223737000 | 2.968295000  | -1.349157000 |
| C  | 2.317483000  | 0.398191000  | 0.105383000  |
| C  | 3.136400000  | 0.292867000  | 1.220855000  |
| C  | 2.648193000  | -0.225094000 | -1.089863000 |
| C  | 4.303987000  | -0.452688000 | 1.137451000  |
| C  | 3.822783000  | -0.957895000 | -1.164125000 |
| C  | 4.648550000  | -1.074224000 | -0.053721000 |
| H  | 2.868528000  | 0.788615000  | 2.146655000  |
| H  | 1.989320000  | -0.162321000 | -1.946710000 |
| H  | 4.946432000  | -0.540315000 | 2.005463000  |
| H  | 4.088344000  | -1.446612000 | -2.094037000 |
| H  | 5.562930000  | -1.651956000 | -0.117977000 |

32

I3a,b [RuCl<sub>2</sub>(CO)<sub>3</sub>(SePh<sub>2</sub>)] symmetry c1 (E=-4219.22031635)

|    |              |              |              |
|----|--------------|--------------|--------------|
| Ru | 1.567137000  | -0.076783000 | 0.208838000  |
| C  | 1.199751000  | 1.439436000  | 1.263390000  |
| O  | 1.019247000  | 2.364426000  | 1.889719000  |
| C  | 1.031567000  | -1.276970000 | 1.556219000  |
| O  | 0.725409000  | -1.988979000 | 2.381848000  |
| Cl | 2.055101000  | -1.939289000 | -1.243868000 |
| Cl | 2.168662000  | 1.468834000  | -1.540943000 |
| C  | 3.385028000  | -0.117863000 | 0.766756000  |
| O  | 4.471767000  | -0.149688000 | 1.067855000  |
| Se | -0.686677000 | -0.018189000 | -0.999839000 |
| C  | -1.576361000 | 1.530195000  | -0.299324000 |
| C  | -1.664059000 | 2.628710000  | -1.141512000 |
| C  | -2.061358000 | 1.580341000  | 1.001150000  |
| C  | -2.243162000 | 3.799061000  | -0.669391000 |
| C  | -2.649059000 | 2.748779000  | 1.456350000  |
| C  | -2.736914000 | 3.858279000  | 0.624531000  |
| H  | -1.282262000 | 2.575129000  | -2.153822000 |
| H  | -1.986944000 | 0.719240000  | 1.654122000  |
| H  | -2.311204000 | 4.662022000  | -1.320679000 |
| H  | -3.032145000 | 2.794383000  | 2.468756000  |
| H  | -3.192648000 | 4.771271000  | 0.988683000  |
| C  | -1.848797000 | -1.414346000 | -0.359015000 |
| C  | -1.320281000 | -2.686176000 | -0.188193000 |
| C  | -3.206772000 | -1.177156000 | -0.198072000 |
| C  | -2.161672000 | -3.725073000 | 0.180945000  |

|   |              |              |              |
|---|--------------|--------------|--------------|
| C | -4.036570000 | -2.224836000 | 0.173450000  |
| C | -3.517161000 | -3.496551000 | 0.368377000  |
| H | -0.265082000 | -2.870236000 | -0.354483000 |
| H | -3.621146000 | -0.189509000 | -0.354371000 |
| H | -1.750076000 | -4.717460000 | 0.321492000  |
| H | -5.095908000 | -2.040914000 | 0.307956000  |
| H | -4.170014000 | -4.310357000 | 0.660427000  |

18

I3a,b [RuCl<sub>2</sub>(CO)<sub>3</sub>(TeMe<sub>2</sub>)] symmetry c1 (E=-1702.82142056)

|    |              |              |              |
|----|--------------|--------------|--------------|
| Ru | -0.879492000 | 0.070796000  | 0.075474000  |
| C  | -1.145197000 | -0.517561000 | 1.837809000  |
| O  | -1.311139000 | -0.884159000 | 2.897497000  |
| C  | -0.802641000 | 1.883304000  | 0.550965000  |
| O  | -0.757489000 | 2.983255000  | 0.823047000  |
| Cl | -0.485445000 | 0.780096000  | -2.205033000 |
| Cl | -0.865032000 | -2.258501000 | -0.580847000 |
| Te | 1.797949000  | -0.201880000 | 0.420981000  |
| C  | 2.321650000  | -1.142530000 | -1.400208000 |
| H  | 1.810138000  | -0.617148000 | -2.203166000 |
| H  | 3.404641000  | -1.082824000 | -1.491061000 |
| H  | 1.987068000  | -2.174277000 | -1.335910000 |
| C  | 2.477332000  | 1.716370000  | -0.180601000 |
| H  | 1.943924000  | 1.986185000  | -1.090165000 |
| H  | 2.266388000  | 2.419273000  | 0.622713000  |
| H  | 3.549636000  | 1.651164000  | -0.352314000 |
| C  | -2.755455000 | 0.123267000  | -0.324027000 |
| O  | -3.853060000 | 0.145423000  | -0.583746000 |

25

I3a,b [RuCl<sub>2</sub>(CO)<sub>3</sub>(TeMePh)] symmetry c1 (E=-1894.40442880)

|    |              |              |              |
|----|--------------|--------------|--------------|
| Ru | 1.346237000  | 0.394765000  | 0.155996000  |
| C  | 0.241142000  | 1.826865000  | 0.661058000  |
| O  | -0.425718000 | 2.694240000  | 0.955578000  |
| C  | 1.710128000  | -0.110374000 | 1.925953000  |
| O  | 1.944757000  | -0.417625000 | 2.991455000  |
| Cl | 2.615458000  | -1.537046000 | -0.559947000 |
| Cl | 0.908448000  | 1.013550000  | -2.144591000 |
| C  | 2.915339000  | 1.487729000  | 0.017831000  |
| O  | 3.841190000  | 2.123855000  | -0.086441000 |
| Te | -0.704745000 | -1.377006000 | 0.166487000  |
| H  | -0.659049000 | -1.108621000 | -2.491556000 |
| C  | -0.722915000 | -1.989577000 | -1.859008000 |
| H  | -1.643152000 | -2.548881000 | -2.013259000 |
| H  | 0.153461000  | -2.619608000 | -1.992006000 |
| C  | -2.428576000 | -0.165821000 | 0.068522000  |
| C  | -2.598219000 | 0.754668000  | -0.958622000 |
| C  | -3.384595000 | -0.301532000 | 1.067197000  |
| C  | -3.741592000 | 1.539070000  | -0.984792000 |
| C  | -4.522142000 | 0.494140000  | 1.036006000  |
| C  | -4.701515000 | 1.410702000  | 0.010550000  |
| H  | -1.838773000 | 0.876132000  | -1.722809000 |
| H  | -3.251524000 | -1.022380000 | 1.865967000  |
| H  | -3.878381000 | 2.258089000  | -1.784045000 |
| H  | -5.269387000 | 0.391885000  | 1.814118000  |
| H  | -5.591478000 | 2.028501000  | -0.013339000 |

32

I3a,b [RuCl<sub>2</sub>(CO)<sub>3</sub>(TePh<sub>2</sub>)] symmetry c1 (E=-2085.98748188)

|    |              |              |             |
|----|--------------|--------------|-------------|
| Ru | -1.695546000 | -0.037036000 | 0.291714000 |
| C  | -1.210679000 | -1.530658000 | 1.321939000 |
| O  | -0.941045000 | -2.444925000 | 1.933802000 |

|    |              |              |              |
|----|--------------|--------------|--------------|
| C  | -1.140666000 | 1.184131000  | 1.605626000  |
| O  | -0.815472000 | 1.915199000  | 2.408199000  |
| Cl | -2.247906000 | 1.819542000  | -1.160473000 |
| Cl | -2.284768000 | -1.601195000 | -1.458387000 |
| C  | -3.510114000 | -0.062361000 | 0.912197000  |
| O  | -4.585171000 | -0.072606000 | 1.254103000  |
| Te | 0.617111000  | 0.015365000  | -1.077390000 |
| C  | 1.754801000  | -1.538430000 | -0.218781000 |
| C  | 2.163302000  | -1.504724000 | 1.109674000  |
| C  | 2.048927000  | -2.631436000 | -1.023798000 |
| C  | 2.877248000  | -2.572823000 | 1.628923000  |
| C  | 2.755842000  | -3.701674000 | -0.491367000 |
| C  | 3.170707000  | -3.671532000 | 0.831114000  |
| H  | 1.935682000  | -0.653740000 | 1.740923000  |
| H  | 1.732570000  | -2.655512000 | -2.060219000 |
| H  | 3.199535000  | -2.548390000 | 2.663196000  |
| H  | 2.984413000  | -4.556579000 | -1.116561000 |
| H  | 3.725179000  | -4.506045000 | 1.243699000  |
| C  | 1.747848000  | 1.624516000  | -0.294042000 |
| C  | 3.100576000  | 1.468949000  | -0.020639000 |
| C  | 1.132808000  | 2.862496000  | -0.153261000 |
| C  | 3.834955000  | 2.559731000  | 0.423360000  |
| C  | 1.877210000  | 3.945999000  | 0.290034000  |
| C  | 3.225442000  | 3.795977000  | 0.582228000  |
| H  | 3.586644000  | 0.508899000  | -0.143600000 |
| H  | 0.080971000  | 2.986708000  | -0.387540000 |
| H  | 4.889091000  | 2.438387000  | 0.643778000  |
| H  | 1.397148000  | 4.910469000  | 0.407236000  |
| H  | 3.802765000  | 4.644215000  | 0.930522000  |

25

cct-[RuCl<sub>2</sub>(CO)<sub>2</sub>(SMe<sub>2</sub>)<sub>2</sub>] symmetry c2 (E=-2197.43944230)

|    |              |              |              |
|----|--------------|--------------|--------------|
| Ru | 0.000000000  | 0.000000000  | 0.218292000  |
| Cl | 1.758299000  | 0.021462000  | -1.460082000 |
| Cl | -1.758299000 | -0.021462000 | -1.460082000 |
| C  | -1.338976000 | -0.061123000 | 1.496256000  |
| O  | -2.163466000 | -0.120204000 | 2.279439000  |
| S  | 0.000000000  | 2.398233000  | 0.153607000  |
| S  | 0.000000000  | -2.398233000 | 0.153607000  |
| C  | 0.045697000  | 2.900915000  | -1.565074000 |
| C  | -1.657946000 | 2.938415000  | 0.570189000  |
| C  | 1.657946000  | -2.938415000 | 0.570189000  |
| C  | -0.045697000 | -2.900915000 | -1.565074000 |
| H  | -0.058355000 | 3.985598000  | -1.591981000 |
| H  | 1.011696000  | 2.598983000  | -1.961474000 |
| H  | -0.755070000 | 2.407556000  | -2.112914000 |
| H  | -1.718778000 | 4.012359000  | 0.395792000  |
| H  | -2.384701000 | 2.402547000  | -0.039398000 |
| H  | -1.820052000 | 2.735270000  | 1.627481000  |
| H  | 1.820052000  | -2.735270000 | 1.627481000  |
| H  | 1.718778000  | -4.012359000 | 0.395792000  |
| H  | 2.384701000  | -2.402547000 | -0.039398000 |
| H  | -1.011696000 | -2.598983000 | -1.961474000 |
| H  | 0.755070000  | -2.407556000 | -2.112914000 |
| H  | 0.058355000  | -3.985598000 | -1.591981000 |
| C  | 1.338976000  | 0.061123000  | 1.496256000  |
| O  | 2.163466000  | 0.120204000  | 2.279439000  |

39

cct-[RuCl<sub>2</sub>(CO)<sub>2</sub>(SMePh)<sub>2</sub>] symmetry c2 (E=-2580.61012857)

|    |             |             |             |
|----|-------------|-------------|-------------|
| Ru | 0.000000000 | 0.000000000 | 0.347294000 |
| Cl | 1.359543000 | 1.102180000 | 2.036783000 |

|    |              |              |              |
|----|--------------|--------------|--------------|
| Cl | -1.359543000 | -1.102180000 | 2.036783000  |
| C  | -1.014614000 | -0.874818000 | -0.934668000 |
| O  | -1.643718000 | -1.402914000 | -1.721977000 |
| C  | 1.014614000  | 0.874818000  | -0.934668000 |
| O  | 1.643718000  | 1.402914000  | -1.721977000 |
| S  | -1.674079000 | 1.713339000  | 0.424497000  |
| H  | -2.481083000 | 3.157385000  | 2.108206000  |
| C  | -1.790413000 | 2.315304000  | 2.109667000  |
| H  | -0.811572000 | 2.591242000  | 2.492238000  |
| H  | -2.190605000 | 1.486726000  | 2.690621000  |
| C  | -1.063807000 | 3.135860000  | -0.441333000 |
| C  | -1.674611000 | 3.446578000  | -1.649197000 |
| C  | 0.000000000  | 3.892800000  | 0.035210000  |
| C  | -1.212851000 | 4.525101000  | -2.389894000 |
| C  | 0.444442000  | 4.975102000  | -0.706008000 |
| C  | -0.157863000 | 5.291268000  | -1.917484000 |
| H  | -2.505061000 | 2.848033000  | -2.004819000 |
| H  | 0.492047000  | 3.622559000  | 0.961330000  |
| H  | -1.685536000 | 4.768569000  | -3.333844000 |
| H  | 1.272954000  | 5.569236000  | -0.339139000 |
| H  | 0.198454000  | 6.136480000  | -2.494281000 |
| S  | 1.674079000  | -1.713339000 | 0.424497000  |
| H  | 2.481083000  | -3.157385000 | 2.108206000  |
| C  | 1.790413000  | -2.315304000 | 2.109667000  |
| H  | 0.811572000  | -2.591242000 | 2.492238000  |
| H  | 2.190605000  | -1.486726000 | 2.690621000  |
| C  | 1.063807000  | -3.135860000 | -0.441333000 |
| C  | 1.674611000  | -3.446578000 | -1.649197000 |
| C  | 0.000000000  | -3.892800000 | 0.035210000  |
| C  | 1.212851000  | -4.525101000 | -2.389894000 |
| C  | -0.444442000 | -4.975102000 | -0.706008000 |
| C  | 0.157863000  | -5.291268000 | -1.917484000 |
| H  | 2.505061000  | -2.848033000 | -2.004819000 |
| H  | -0.492047000 | -3.622559000 | 0.961330000  |
| H  | 1.685536000  | -4.768569000 | -3.333844000 |
| H  | -1.272954000 | -5.569236000 | -0.339139000 |
| H  | -0.198454000 | -6.136480000 | -2.494281000 |

53

cct-[RuCl2(CO)2(SPh2)2] symmetry c2 (E=-2963.77451335)

|    |              |              |              |
|----|--------------|--------------|--------------|
| Ru | -0.000014000 | 0.000006000  | 0.492074000  |
| Cl | -0.061793000 | 1.713421000  | 2.214888000  |
| Cl | 0.062855000  | -1.717888000 | 2.210312000  |
| C  | -0.017505000 | -1.311484000 | -0.819756000 |
| O  | -0.049479000 | -2.099044000 | -1.640172000 |
| C  | 0.016767000  | 1.315232000  | -0.816022000 |
| O  | 0.048078000  | 2.105353000  | -1.633993000 |
| S  | 2.372486000  | -0.029403000 | 0.819361000  |
| C  | 3.030436000  | -1.438328000 | -0.029669000 |
| C  | 3.078635000  | -1.516757000 | -1.417157000 |
| C  | 3.462795000  | -2.494312000 | 0.760238000  |
| C  | 3.572641000  | -2.663315000 | -2.012897000 |
| C  | 3.944057000  | -3.645478000 | 0.152181000  |
| C  | 4.001947000  | -3.728933000 | -1.230119000 |
| H  | 2.737791000  | -0.687945000 | -2.025729000 |
| H  | 3.415808000  | -2.415346000 | 1.839037000  |
| H  | 3.614911000  | -2.728845000 | -3.093396000 |
| H  | 4.278097000  | -4.474238000 | 0.764506000  |
| H  | 4.382370000  | -4.626576000 | -1.702833000 |
| C  | 3.240158000  | 1.338582000  | 0.074208000  |
| C  | 2.704778000  | 2.612667000  | 0.224088000  |
| C  | 4.486346000  | 1.163096000  | -0.515817000 |

|   |              |              |              |
|---|--------------|--------------|--------------|
| C | 3.406772000  | 3.707998000  | -0.252475000 |
| C | 5.177700000  | 2.268283000  | -0.988540000 |
| C | 4.640208000  | 3.540792000  | -0.865466000 |
| H | 1.752897000  | 2.747160000  | 0.723891000  |
| H | 4.920438000  | 0.177023000  | -0.610293000 |
| H | 2.981934000  | 4.698485000  | -0.140584000 |
| H | 6.145285000  | 2.126523000  | -1.455238000 |
| H | 5.183675000  | 4.399840000  | -1.240169000 |
| S | -2.372455000 | 0.029087000  | 0.819741000  |
| C | -3.029990000 | 1.437999000  | -0.029704000 |
| C | -3.459708000 | 2.495424000  | 0.759715000  |
| C | -3.080005000 | 1.515041000  | -1.417201000 |
| C | -3.940133000 | 3.646652000  | 0.151110000  |
| C | -3.573213000 | 2.661675000  | -2.013449000 |
| C | -3.999868000 | 3.728742000  | -1.231196000 |
| H | -3.411331000 | 2.417512000  | 1.838532000  |
| H | -2.741128000 | 0.685125000  | -2.025370000 |
| H | -4.272142000 | 4.476527000  | 0.763030000  |
| H | -3.616888000 | 2.726128000  | -3.093957000 |
| H | -4.379672000 | 4.626429000  | -1.704325000 |
| C | -3.240685000 | -1.338595000 | 0.074647000  |
| C | -4.488789000 | -1.162762000 | -0.511288000 |
| C | -2.704146000 | -2.612601000 | 0.220613000  |
| C | -5.180943000 | -2.267459000 | -0.983912000 |
| C | -3.406996000 | -3.707493000 | -0.255773000 |
| C | -4.642352000 | -3.539895000 | -0.864727000 |
| H | -4.923691000 | -0.176744000 | -0.602682000 |
| H | -1.750794000 | -2.747500000 | 0.717458000  |
| H | -6.150017000 | -2.125420000 | -1.447422000 |
| H | -2.981269000 | -4.697935000 | -0.146915000 |
| H | -5.186470000 | -4.398586000 | -1.239310000 |

25

cct-[RuCl<sub>2</sub>(CO)<sub>2</sub>(SeMe<sub>2</sub>)<sub>2</sub>] symmetry c2 (E=-6203.84944176)

|    |              |              |              |
|----|--------------|--------------|--------------|
| Ru | 0.000000000  | 0.000000000  | 0.224608000  |
| Cl | 1.760252000  | 0.036311000  | -1.457261000 |
| Cl | -1.760252000 | -0.036311000 | -1.457261000 |
| C  | -1.336571000 | -0.030665000 | 1.500447000  |
| O  | -2.163229000 | -0.058180000 | 2.284989000  |
| Se | 0.028574000  | 2.510126000  | 0.132657000  |
| Se | -0.028574000 | -2.510126000 | 0.132657000  |
| C  | 0.000000000  | 2.935467000  | -1.752580000 |
| C  | -1.800386000 | 3.021236000  | 0.506105000  |
| C  | 1.800386000  | -3.021236000 | 0.506105000  |
| C  | 0.000000000  | -2.935467000 | -1.752580000 |
| H  | -0.174280000 | 4.006885000  | -1.836971000 |
| H  | 0.972652000  | 2.662893000  | -2.152143000 |
| H  | -0.786713000 | 2.352898000  | -2.226075000 |
| H  | -1.906263000 | 4.078240000  | 0.269263000  |
| H  | -2.462382000 | 2.408277000  | -0.102576000 |
| H  | -1.980139000 | 2.856529000  | 1.566483000  |
| H  | 1.980139000  | -2.856529000 | 1.566483000  |
| H  | 1.906263000  | -4.078240000 | 0.269263000  |
| H  | 2.462382000  | -2.408277000 | -0.102576000 |
| H  | -0.972652000 | -2.662893000 | -2.152143000 |
| H  | 0.786713000  | -2.352898000 | -2.226075000 |
| H  | 0.174280000  | -4.006885000 | -1.836971000 |
| C  | 1.336571000  | 0.030665000  | 1.500447000  |
| O  | 2.163229000  | 0.058180000  | 2.284989000  |

39

cct-[RuCl<sub>2</sub>(CO)<sub>2</sub>(SeMePh)<sub>2</sub>] symmetry c2 (E=-6587.01766694)



|    |              |              |              |
|----|--------------|--------------|--------------|
| Ru | 0.000000000  | 0.000000000  | 0.230451000  |
| Cl | 1.340611000  | 1.120453000  | 1.929119000  |
| Cl | -1.340611000 | -1.120453000 | 1.929119000  |
| C  | -0.971710000 | -0.912114000 | -1.052580000 |
| O  | -1.571100000 | -1.469998000 | -1.844311000 |
| C  | 0.971710000  | 0.912114000  | -1.052580000 |
| O  | 1.571100000  | 1.469998000  | -1.844311000 |
| Se | -1.821688000 | 1.721418000  | 0.336202000  |
| H  | -2.508938000 | 3.191585000  | 2.213467000  |
| C  | -1.833517000 | 2.339802000  | 2.169274000  |
| H  | -0.823051000 | 2.595090000  | 2.474416000  |
| H  | -2.206037000 | 1.505037000  | 2.758123000  |
| C  | -1.137299000 | 3.302760000  | -0.508023000 |
| C  | -1.811020000 | 3.772108000  | -1.626424000 |
| C  | 0.000000000  | 3.943231000  | -0.035009000 |
| C  | -1.337515000 | 4.901130000  | -2.281229000 |
| C  | 0.458270000  | 5.075237000  | -0.690401000 |
| C  | -0.207350000 | 5.553704000  | -1.811980000 |
| H  | -2.698963000 | 3.263733000  | -1.983876000 |
| H  | 0.536078000  | 3.548485000  | 0.820210000  |
| H  | -1.858417000 | 5.271276000  | -3.156271000 |
| H  | 1.345307000  | 5.580609000  | -0.326967000 |
| H  | 0.158639000  | 6.436854000  | -2.322174000 |
| Se | 1.821688000  | -1.721418000 | 0.336202000  |
| H  | 2.508938000  | -3.191585000 | 2.213467000  |
| C  | 1.833517000  | -2.339802000 | 2.169274000  |
| H  | 0.823051000  | -2.595090000 | 2.474416000  |
| H  | 2.206037000  | -1.505037000 | 2.758123000  |
| C  | 1.137299000  | -3.302760000 | -0.508023000 |
| C  | 1.811020000  | -3.772108000 | -1.626424000 |
| C  | 0.000000000  | -3.943231000 | -0.035009000 |
| C  | 1.337515000  | -4.901130000 | -2.281229000 |
| C  | -0.458270000 | -5.075237000 | -0.690401000 |
| C  | 0.207350000  | -5.553704000 | -1.811980000 |
| H  | 2.698963000  | -3.263733000 | -1.983876000 |
| H  | -0.536078000 | -3.548485000 | 0.820210000  |
| H  | 1.858417000  | -5.271276000 | -3.156271000 |
| H  | -1.345307000 | -5.580609000 | -0.326967000 |
| H  | -0.158639000 | -6.436854000 | -2.322174000 |

53

cct-[RuCl2(CO)2(SePh2)2] symmetry c2 (E=-6970.18282694)

|    |              |              |              |
|----|--------------|--------------|--------------|
| Ru | 0.000000000  | 0.000000000  | 0.520533000  |
| Cl | -1.665406000 | 0.445338000  | 2.239146000  |
| Cl | 1.665406000  | -0.445338000 | 2.239146000  |
| C  | 1.257087000  | -0.385170000 | -0.782399000 |
| O  | 2.015111000  | -0.631669000 | -1.595558000 |
| C  | -1.257087000 | 0.385170000  | -0.782399000 |
| O  | -2.015111000 | 0.631669000  | -1.595558000 |
| Se | 0.740459000  | 2.361510000  | 0.876614000  |
| C  | 2.263260000  | 2.591689000  | -0.265381000 |
| C  | 2.148446000  | 2.625331000  | -1.648820000 |
| C  | 3.501654000  | 2.668594000  | 0.354003000  |
| C  | 3.293478000  | 2.748009000  | -2.417707000 |
| C  | 4.644476000  | 2.777748000  | -0.427274000 |
| C  | 4.540619000  | 2.820846000  | -1.808949000 |
| H  | 1.177314000  | 2.557917000  | -2.124270000 |
| H  | 3.575697000  | 2.640887000  | 1.434444000  |
| H  | 3.211500000  | 2.777523000  | -3.497667000 |
| H  | 5.615343000  | 2.834750000  | 0.050062000  |
| H  | 5.433334000  | 2.911039000  | -2.416305000 |
| C  | -0.480613000 | 3.608844000  | 0.061121000  |

|    |              |              |              |
|----|--------------|--------------|--------------|
| C  | -1.843811000 | 3.400551000  | 0.216692000  |
| C  | 0.000000000  | 4.757256000  | -0.553515000 |
| C  | -2.734040000 | 4.341726000  | -0.278589000 |
| C  | -0.901100000 | 5.689362000  | -1.046617000 |
| C  | -2.266837000 | 5.482577000  | -0.915007000 |
| H  | -2.208170000 | 2.517400000  | 0.728625000  |
| H  | 1.063907000  | 4.928916000  | -0.655162000 |
| H  | -3.798983000 | 4.177228000  | -0.164411000 |
| H  | -0.528289000 | 6.582340000  | -1.534337000 |
| H  | -2.966165000 | 6.213068000  | -1.303938000 |
| Se | -0.740459000 | -2.361510000 | 0.876614000  |
| C  | -2.263260000 | -2.591689000 | -0.265381000 |
| C  | -3.501654000 | -2.668594000 | 0.354003000  |
| C  | -2.148446000 | -2.625331000 | -1.648820000 |
| C  | -4.644476000 | -2.777748000 | -0.427274000 |
| C  | -3.293478000 | -2.748009000 | -2.417707000 |
| C  | -4.540619000 | -2.820846000 | -1.808949000 |
| H  | -3.575697000 | -2.640887000 | 1.434444000  |
| H  | -1.177314000 | -2.557917000 | -2.124270000 |
| H  | -5.615343000 | -2.834750000 | 0.050062000  |
| H  | -3.211500000 | -2.777523000 | -3.497667000 |
| H  | -5.433334000 | -2.911039000 | -2.416305000 |
| C  | 0.480613000  | -3.608844000 | 0.061121000  |
| C  | 0.000000000  | -4.757256000 | -0.553515000 |
| C  | 1.843811000  | -3.400551000 | 0.216692000  |
| C  | 0.901100000  | -5.689362000 | -1.046617000 |
| C  | 2.734040000  | -4.341726000 | -0.278589000 |
| C  | 2.266837000  | -5.482577000 | -0.915007000 |
| H  | -1.063907000 | -4.928916000 | -0.655162000 |
| H  | 2.208170000  | -2.517400000 | 0.728625000  |
| H  | 0.528289000  | -6.582340000 | -1.534337000 |
| H  | 3.798983000  | -4.177228000 | -0.164411000 |
| H  | 2.966165000  | -6.213068000 | -1.303938000 |

25

cct-[RuCl<sub>2</sub>(CO)<sub>2</sub>(TeMe<sub>2</sub>)<sub>2</sub>] symmetry c2 (E=-1937.38606211)

|    |              |              |              |
|----|--------------|--------------|--------------|
| Ru | 0.000000000  | 0.000000000  | 0.252679000  |
| Cl | 1.514995000  | 0.900640000  | -1.440413000 |
| Cl | -1.514995000 | -0.900640000 | -1.440413000 |
| C  | -1.126563000 | -0.714067000 | 1.526189000  |
| O  | -1.825385000 | -1.159998000 | 2.311408000  |
| Te | -1.467381000 | 2.217320000  | 0.109775000  |
| Te | 1.467381000  | -2.217320000 | 0.109775000  |
| C  | 0.000000000  | 3.709667000  | 0.464080000  |
| C  | -1.529456000 | 2.556122000  | -1.979542000 |
| C  | 1.529456000  | -2.556122000 | -1.979542000 |
| C  | 0.000000000  | -3.709667000 | 0.464080000  |
| H  | -0.416470000 | 4.672816000  | 0.176269000  |
| H  | 0.238557000  | 3.703701000  | 1.525769000  |
| H  | 0.874204000  | 3.457773000  | -0.133568000 |
| H  | -1.889502000 | 3.571394000  | -2.136040000 |
| H  | -0.523251000 | 2.411519000  | -2.366333000 |
| H  | -2.214184000 | 1.825478000  | -2.401923000 |
| H  | 2.214184000  | -1.825478000 | -2.401923000 |
| H  | 1.889502000  | -3.571394000 | -2.136040000 |
| H  | 0.523251000  | -2.411519000 | -2.366333000 |
| H  | -0.238557000 | -3.703701000 | 1.525769000  |
| H  | -0.874204000 | -3.457773000 | -0.133568000 |
| H  | 0.416470000  | -4.672816000 | 0.176269000  |
| C  | 1.126563000  | 0.714067000  | 1.526189000  |
| O  | 1.825385000  | 1.159998000  | 2.311408000  |

39

cct-[RuCl<sub>2</sub>(CO)<sub>2</sub>(TeMePh)<sub>2</sub>] symmetry c2 (E=-2320.55300864)

|    |              |              |              |
|----|--------------|--------------|--------------|
| Ru | 0.000000000  | 0.000000000  | 0.108585000  |
| Cl | -1.332934000 | 1.137501000  | 1.817795000  |
| Cl | 1.332934000  | -1.137501000 | 1.817795000  |
| C  | 0.927129000  | -0.951144000 | -1.172826000 |
| O  | 1.495334000  | -1.542684000 | -1.965597000 |
| C  | -0.927129000 | 0.951144000  | -1.172826000 |
| O  | -1.495334000 | 1.542684000  | -1.965597000 |
| Te | 1.992430000  | 1.751112000  | 0.273675000  |
| H  | 0.812980000  | 2.596951000  | 2.515614000  |
| C  | 1.853626000  | 2.377403000  | 2.292890000  |
| H  | 2.495751000  | 3.248116000  | 2.407135000  |
| H  | 2.204034000  | 1.542029000  | 2.894568000  |
| C  | 1.206856000  | 3.530017000  | -0.547262000 |
| C  | 0.000000000  | 4.048788000  | -0.093172000 |
| C  | 1.915631000  | 4.166721000  | -1.558216000 |
| C  | -0.491764000 | 5.218596000  | -0.652340000 |
| C  | 1.411559000  | 5.333670000  | -2.117952000 |
| C  | 0.211503000  | 5.860236000  | -1.663792000 |
| H  | -0.562970000 | 3.535786000  | 0.679191000  |
| H  | 2.857884000  | 3.762212000  | -1.910551000 |
| H  | -1.432277000 | 5.626148000  | -0.300005000 |
| H  | 1.962016000  | 5.831380000  | -2.907777000 |
| H  | -0.178944000 | 6.772307000  | -2.099870000 |
| Te | -1.992430000 | -1.751112000 | 0.273675000  |
| H  | -0.812980000 | -2.596951000 | 2.515614000  |
| C  | -1.853626000 | -2.377403000 | 2.292890000  |
| H  | -2.495751000 | -3.248116000 | 2.407135000  |
| H  | -2.204034000 | -1.542029000 | 2.894568000  |
| C  | -1.206856000 | -3.530017000 | -0.547262000 |
| C  | 0.000000000  | -4.048788000 | -0.093172000 |
| C  | -1.915631000 | -4.166721000 | -1.558216000 |
| C  | 0.491764000  | -5.218596000 | -0.652340000 |
| C  | -1.411559000 | -5.333670000 | -2.117952000 |
| C  | -0.211503000 | -5.860236000 | -1.663792000 |
| H  | 0.562970000  | -3.535786000 | 0.679191000  |
| H  | -2.857884000 | -3.762212000 | -1.910551000 |
| H  | 1.432277000  | -5.626148000 | -0.300005000 |
| H  | -1.962016000 | -5.831380000 | -2.907777000 |
| H  | 0.178944000  | -6.772307000 | -2.099870000 |

53

cct-[RuCl<sub>2</sub>(CO)<sub>2</sub>(TePh<sub>2</sub>)<sub>2</sub>] symmetry c2 (E=-2703.71949104)

|    |              |              |              |
|----|--------------|--------------|--------------|
| Ru | 0.000000000  | 0.000000000  | 0.578593000  |
| Cl | -1.539436000 | 0.771508000  | 2.313848000  |
| Cl | 1.539436000  | -0.771508000 | 2.313848000  |
| C  | 1.167672000  | -0.614994000 | -0.713551000 |
| O  | 1.880504000  | -0.998176000 | -1.516572000 |
| C  | -1.167672000 | 0.614994000  | -0.713551000 |
| O  | -1.880504000 | 0.998176000  | -1.516572000 |
| Te | 1.225382000  | 2.314063000  | 0.936170000  |
| C  | 2.704086000  | 2.330262000  | -0.567053000 |
| C  | 2.363262000  | 2.283090000  | -1.913933000 |
| C  | 4.035649000  | 2.346699000  | -0.173870000 |
| C  | 3.365344000  | 2.260703000  | -2.870298000 |
| C  | 5.034228000  | 2.312640000  | -1.139044000 |
| C  | 4.699944000  | 2.272398000  | -2.483865000 |
| H  | 1.323975000  | 2.266150000  | -2.221480000 |
| H  | 4.300996000  | 2.386817000  | 0.876340000  |
| H  | 3.102363000  | 2.226575000  | -3.921033000 |
| H  | 6.074162000  | 2.322786000  | -0.834721000 |

|    |              |              |              |
|----|--------------|--------------|--------------|
| H  | 5.480302000  | 2.249675000  | -3.235359000 |
| C  | 0.000000000  | 3.793945000  | 0.046367000  |
| C  | -1.367283000 | 3.777611000  | 0.290885000  |
| C  | 0.574415000  | 4.816703000  | -0.698228000 |
| C  | -2.165316000 | 4.784110000  | -0.234139000 |
| C  | -0.233473000 | 5.816598000  | -1.220842000 |
| C  | -1.602150000 | 5.800874000  | -0.992012000 |
| H  | -1.810388000 | 2.985392000  | 0.884489000  |
| H  | 1.641765000  | 4.837882000  | -0.882392000 |
| H  | -3.233241000 | 4.768359000  | -0.049913000 |
| H  | 0.212771000  | 6.610645000  | -1.808240000 |
| H  | -2.229532000 | 6.583079000  | -1.402922000 |
| Te | -1.225382000 | -2.314063000 | 0.936170000  |
| C  | -2.704086000 | -2.330262000 | -0.567053000 |
| C  | -4.035649000 | -2.346699000 | -0.173870000 |
| C  | -2.363262000 | -2.283090000 | -1.913933000 |
| C  | -5.034228000 | -2.312640000 | -1.139044000 |
| C  | -3.365344000 | -2.260703000 | -2.870298000 |
| C  | -4.699944000 | -2.272398000 | -2.483865000 |
| H  | -4.300996000 | -2.386817000 | 0.876340000  |
| H  | -1.323975000 | -2.266150000 | -2.221480000 |
| H  | -6.074162000 | -2.322786000 | -0.834721000 |
| H  | -3.102363000 | -2.226575000 | -3.921033000 |
| H  | -5.480302000 | -2.249675000 | -3.235359000 |
| C  | 0.000000000  | -3.793945000 | 0.046367000  |
| C  | -0.574415000 | -4.816703000 | -0.698228000 |
| C  | 1.367283000  | -3.777611000 | 0.290885000  |
| C  | 0.233473000  | -5.816598000 | -1.220842000 |
| C  | 2.165316000  | -4.784110000 | -0.234139000 |
| C  | 1.602150000  | -5.800874000 | -0.992012000 |
| H  | -1.641765000 | -4.837882000 | -0.882392000 |
| H  | 1.810388000  | -2.985392000 | 0.884489000  |
| H  | -0.212771000 | -6.610645000 | -1.808240000 |
| H  | 3.233241000  | -4.768359000 | -0.049913000 |
| H  | 2.229532000  | -6.583079000 | -1.402922000 |

25

ctc-[RuCl2(CO)2(SMe2)2] symmetry c1 (E=-2197.427326)

|    |              |              |              |
|----|--------------|--------------|--------------|
| Ru | -0.035194000 | 0.449794000  | 0.075367000  |
| S  | 1.630520000  | -1.272229000 | -0.468150000 |
| C  | 2.156053000  | -2.118955000 | 1.020043000  |
| C  | 3.150555000  | -0.437377000 | -0.922539000 |
| H  | 1.296076000  | -2.658129000 | 1.410492000  |
| H  | 2.947708000  | -2.817845000 | 0.751319000  |
| H  | 2.502810000  | -1.406210000 | 1.766493000  |
| H  | 2.901810000  | 0.243738000  | -1.734244000 |
| H  | 3.554097000  | 0.116180000  | -0.075633000 |
| H  | 3.866497000  | -1.184829000 | -1.261675000 |
| S  | -1.726795000 | -0.986007000 | -1.012285000 |
| C  | -3.275642000 | -0.665789000 | -0.164495000 |
| C  | -1.453802000 | -2.671239000 | -0.461059000 |
| H  | -3.605576000 | 0.334226000  | -0.441416000 |
| H  | -3.127675000 | -0.733466000 | 0.912966000  |
| H  | -4.011630000 | -1.394140000 | -0.503219000 |
| H  | -2.291587000 | -3.279818000 | -0.800377000 |
| H  | -1.367353000 | -2.695907000 | 0.624733000  |
| H  | -0.537437000 | -3.028682000 | -0.927837000 |
| C  | 1.267183000  | 1.514559000  | 0.860726000  |
| O  | 2.058976000  | 2.162167000  | 1.358933000  |
| Cl | 0.418781000  | 1.301458000  | -2.119088000 |
| C  | -1.302917000 | 1.777309000  | 0.380554000  |
| Cl | -0.557242000 | -0.579766000 | 2.170905000  |

O -2.050668000 2.611072000 0.577185000

39

ctc-[RuCl2(CO)2(SMePh)2] symmetry c2 (E=-2580.59773028)

|    |              |              |              |
|----|--------------|--------------|--------------|
| Ru | 0.000000000  | 0.000000000  | 0.396168000  |
| S  | 0.485833000  | -1.587888000 | -1.439540000 |
| C  | 2.015524000  | -1.138709000 | -2.252212000 |
| H  | 1.794360000  | -0.231291000 | -2.813188000 |
| H  | 2.802502000  | -0.923499000 | -1.534029000 |
| H  | 2.290608000  | -1.940080000 | -2.936503000 |
| S  | -0.485833000 | 1.587888000  | -1.439540000 |
| C  | -2.015524000 | 1.138709000  | -2.252212000 |
| H  | -2.290608000 | 1.940080000  | -2.936503000 |
| H  | -2.802502000 | 0.923499000  | -1.534029000 |
| H  | -1.794360000 | 0.231291000  | -2.813188000 |
| C  | 0.860938000  | -3.142921000 | -0.677282000 |
| C  | -0.860938000 | 3.142921000  | -0.677282000 |
| C  | -1.290472000 | 5.570920000  | 0.582339000  |
| C  | 0.220295000  | 3.965774000  | -0.380230000 |
| C  | -2.154827000 | 3.527323000  | -0.352939000 |
| C  | -2.363127000 | 4.747799000  | 0.272481000  |
| C  | 0.000000000  | 5.175689000  | 0.257687000  |
| H  | 1.224367000  | 3.649924000  | -0.635858000 |
| H  | -2.998111000 | 2.885790000  | -0.571173000 |
| H  | -3.372828000 | 5.049793000  | 0.524255000  |
| H  | 0.842334000  | 5.814870000  | 0.494053000  |
| H  | -1.460031000 | 6.520748000  | 1.075114000  |
| C  | 1.290472000  | -5.570920000 | 0.582339000  |
| C  | -0.220295000 | -3.965774000 | -0.380230000 |
| C  | 2.154827000  | -3.527323000 | -0.352939000 |
| C  | 2.363127000  | -4.747799000 | 0.272481000  |
| C  | 0.000000000  | -5.175689000 | 0.257687000  |
| H  | -1.224367000 | -3.649924000 | -0.635858000 |
| H  | 2.998111000  | -2.885790000 | -0.571173000 |
| H  | 3.372828000  | -5.049793000 | 0.524255000  |
| H  | -0.842334000 | -5.814870000 | 0.494053000  |
| H  | 1.460031000  | -6.520748000 | 1.075114000  |
| C  | 0.514829000  | -1.203963000 | 1.712177000  |
| Cl | 2.201696000  | 0.935729000  | 0.324506000  |
| O  | 0.829644000  | -1.929565000 | 2.528194000  |
| Cl | -2.201696000 | -0.935729000 | 0.324506000  |
| C  | -0.514829000 | 1.203963000  | 1.712177000  |
| O  | -0.829644000 | 1.929565000  | 2.528194000  |

53

ctc-[RuCl2(CO)2(SPh)2] symmetry c2 (E=-2963.76729129)

|    |              |              |              |
|----|--------------|--------------|--------------|
| Ru | 0.000000000  | 0.000000000  | 1.384875000  |
| S  | -1.013551000 | -1.421866000 | -0.366172000 |
| S  | 1.013551000  | 1.421866000  | -0.366172000 |
| C  | -0.057685000 | -1.626648000 | -1.852587000 |
| C  | 1.122925000  | 3.080678000  | 0.267479000  |
| C  | 1.423548000  | 5.610524000  | 1.337128000  |
| C  | 2.392347000  | 3.541779000  | 0.590100000  |
| C  | 0.000000000  | 3.871045000  | 0.475302000  |
| C  | 0.158634000  | 5.140914000  | 1.005428000  |
| C  | 2.537607000  | 4.810478000  | 1.133275000  |
| H  | 3.256664000  | 2.911298000  | 0.419113000  |
| H  | -0.985880000 | 3.492126000  | 0.241334000  |
| H  | -0.712978000 | 5.763665000  | 1.168394000  |
| H  | 3.525804000  | 5.173327000  | 1.389435000  |
| H  | 1.538974000  | 6.603012000  | 1.756316000  |
| C  | 1.279220000  | -1.912238000 | -4.255144000 |

|    |              |              |              |
|----|--------------|--------------|--------------|
| C  | -0.781281000 | -1.704157000 | -3.037232000 |
| C  | 1.329230000  | -1.679852000 | -1.859948000 |
| C  | 1.992996000  | -1.825667000 | -3.068743000 |
| C  | -0.107113000 | -1.849595000 | -4.238742000 |
| H  | -1.862270000 | -1.639859000 | -3.015075000 |
| H  | 1.880592000  | -1.593213000 | -0.932037000 |
| H  | 3.075862000  | -1.865318000 | -3.079975000 |
| H  | -0.667846000 | -1.903984000 | -5.164156000 |
| H  | 1.804415000  | -2.020558000 | -5.196861000 |
| C  | -0.595108000 | -1.168177000 | 2.703750000  |
| Cl | 2.130391000  | -1.113143000 | 1.438664000  |
| O  | -0.943927000 | -1.877547000 | 3.518414000  |
| Cl | -2.130391000 | 1.113143000  | 1.438664000  |
| C  | 0.595108000  | 1.168177000  | 2.703750000  |
| O  | 0.943927000  | 1.877547000  | 3.518414000  |
| C  | 0.057685000  | 1.626648000  | -1.852587000 |
| C  | -1.279220000 | 1.912238000  | -4.255144000 |
| C  | 0.781281000  | 1.704157000  | -3.037232000 |
| C  | -1.329230000 | 1.679852000  | -1.859948000 |
| C  | -1.992996000 | 1.825667000  | -3.068743000 |
| C  | 0.107113000  | 1.849595000  | -4.238742000 |
| H  | 1.862270000  | 1.639859000  | -3.015075000 |
| H  | -1.880592000 | 1.593213000  | -0.932037000 |
| H  | -3.075862000 | 1.865318000  | -3.079975000 |
| H  | 0.667846000  | 1.903984000  | -5.164156000 |
| H  | -1.804415000 | 2.020558000  | -5.196861000 |
| C  | -1.122925000 | -3.080678000 | 0.267479000  |
| C  | -1.423548000 | -5.610524000 | 1.337128000  |
| C  | -2.392347000 | -3.541779000 | 0.590100000  |
| C  | 0.000000000  | -3.871045000 | 0.475302000  |
| C  | -0.158634000 | -5.140914000 | 1.005428000  |
| C  | -2.537607000 | -4.810478000 | 1.133275000  |
| H  | -3.256664000 | -2.911298000 | 0.419113000  |
| H  | 0.985880000  | -3.492126000 | 0.241334000  |
| H  | 0.712978000  | -5.763665000 | 1.168394000  |
| H  | -3.525804000 | -5.173327000 | 1.389435000  |
| H  | -1.538974000 | -6.603012000 | 1.756316000  |

25

ctc-[RuCl2(CO)2(SeMe2)2] symmetry c1 (E=-6203.83515252)

|    |              |              |              |
|----|--------------|--------------|--------------|
| Ru | -0.035384000 | 0.696645000  | 0.090214000  |
| Se | 1.707112000  | -1.160499000 | -0.269533000 |
| C  | 2.441177000  | -1.609630000 | 1.462512000  |
| C  | 3.256974000  | -0.253970000 | -0.991946000 |
| H  | 1.650605000  | -2.094225000 | 2.029293000  |
| H  | 3.275830000  | -2.289717000 | 1.303799000  |
| H  | 2.758974000  | -0.703179000 | 1.972332000  |
| H  | 2.917814000  | 0.268612000  | -1.883504000 |
| H  | 3.646339000  | 0.449234000  | -0.258995000 |
| H  | 4.002453000  | -1.005838000 | -1.241282000 |
| Se | -1.849462000 | -0.968957000 | -0.690529000 |
| C  | -3.394857000 | -0.485145000 | 0.372372000  |
| C  | -1.463933000 | -2.617743000 | 0.249358000  |
| H  | -3.789562000 | 0.447217000  | -0.026011000 |
| H  | -3.079961000 | -0.363379000 | 1.407131000  |
| H  | -4.135554000 | -1.275855000 | 0.271061000  |
| H  | -2.332534000 | -3.266263000 | 0.152302000  |
| H  | -1.253048000 | -2.383673000 | 1.291154000  |
| H  | -0.602800000 | -3.078176000 | -0.230530000 |
| C  | 1.300000000  | 1.872773000  | 0.613906000  |
| O  | 2.115325000  | 2.592762000  | 0.950409000  |
| Cl | 0.296052000  | 1.159819000  | -2.240916000 |

|    |              |              |             |
|----|--------------|--------------|-------------|
| C  | -1.315687000 | 2.034666000  | 0.244971000 |
| Cl | -0.408446000 | -0.003459000 | 2.348136000 |
| O  | -2.076968000 | 2.874805000  | 0.344109000 |

39

ctc-[RuCl<sub>2</sub>(CO)<sub>2</sub>(SeMePh)<sub>2</sub>] symmetry c2 (E=-6587.00265630)

|    |              |              |              |
|----|--------------|--------------|--------------|
| Ru | 0.000000000  | 0.000000000  | 0.567891000  |
| Se | 0.101903000  | -1.740893000 | -1.345323000 |
| C  | 1.917488000  | -1.799538000 | -2.000017000 |
| H  | 2.034837000  | -0.909368000 | -2.615163000 |
| H  | 2.621240000  | -1.761748000 | -1.173390000 |
| H  | 2.030063000  | -2.696389000 | -2.605542000 |
| Se | -0.101903000 | 1.740893000  | -1.345323000 |
| C  | -1.917488000 | 1.799538000  | -2.000017000 |
| H  | -2.030063000 | 2.696389000  | -2.605542000 |
| H  | -2.621240000 | 1.761748000  | -1.173390000 |
| H  | -2.034837000 | 0.909368000  | -2.615163000 |
| C  | 0.000000000  | -3.427087000 | -0.438782000 |
| C  | 0.000000000  | 3.427087000  | -0.438782000 |
| C  | 0.280862000  | 5.821469000  | 0.917972000  |
| C  | 1.271224000  | 3.898333000  | -0.135588000 |
| C  | -1.130918000 | 4.141444000  | -0.073718000 |
| C  | -0.982748000 | 5.344441000  | 0.602740000  |
| C  | 1.405470000  | 5.095642000  | 0.550115000  |
| H  | 2.147121000  | 3.327892000  | -0.420074000 |
| H  | -2.123239000 | 3.772889000  | -0.297836000 |
| H  | -1.864804000 | 5.905118000  | 0.888939000  |
| H  | 2.395608000  | 5.463323000  | 0.792262000  |
| H  | 0.389661000  | 6.759062000  | 1.449903000  |
| C  | -0.280862000 | -5.821469000 | 0.917972000  |
| C  | -1.271224000 | -3.898333000 | -0.135588000 |
| C  | 1.130918000  | -4.141444000 | -0.073718000 |
| C  | 0.982748000  | -5.344441000 | 0.602740000  |
| C  | -1.405470000 | -5.095642000 | 0.550115000  |
| H  | -2.147121000 | -3.327892000 | -0.420074000 |
| H  | 2.123239000  | -3.772889000 | -0.297836000 |
| H  | 1.864804000  | -5.905118000 | 0.888939000  |
| H  | -2.395608000 | -5.463323000 | 0.792262000  |
| H  | -0.389661000 | -6.759062000 | 1.449903000  |
| C  | 0.232817000  | -1.295622000 | 1.874364000  |
| Cl | 2.353667000  | 0.425944000  | 0.466994000  |
| O  | 0.380095000  | -2.076116000 | 2.688360000  |
| Cl | -2.353667000 | -0.425944000 | 0.466994000  |
| C  | -0.232817000 | 1.295622000  | 1.874364000  |
| O  | -0.380095000 | 2.076116000  | 2.688360000  |

53

ctc-[RuCl<sub>2</sub>(CO)<sub>2</sub>(SePh<sub>2</sub>)<sub>2</sub>] symmetry c2 (E=-6970.17187690)

|    |              |              |              |
|----|--------------|--------------|--------------|
| Ru | 0.000000000  | 0.000000000  | 1.475836000  |
| Se | -1.152880000 | -1.427708000 | -0.347028000 |
| Se | 1.152880000  | 1.427708000  | -0.347028000 |
| C  | -0.059433000 | -1.641536000 | -1.912553000 |
| C  | 1.143818000  | 3.225315000  | 0.336569000  |
| C  | 1.255487000  | 5.763064000  | 1.421053000  |
| C  | 2.342037000  | 3.693904000  | 0.857118000  |
| C  | 0.000000000  | 4.008878000  | 0.350301000  |
| C  | 0.064863000  | 5.284542000  | 0.890318000  |
| C  | 2.391416000  | 4.967203000  | 1.406855000  |
| H  | 3.230021000  | 3.072766000  | 0.835165000  |
| H  | -0.932929000 | 3.630851000  | -0.044966000 |
| H  | -0.824348000 | 5.903808000  | 0.902102000  |
| H  | 3.323703000  | 5.337106000  | 1.816824000  |

|    |              |              |              |
|----|--------------|--------------|--------------|
| H  | 1.297212000  | 6.759164000  | 1.845470000  |
| C  | 1.373400000  | -1.888843000 | -4.261233000 |
| C  | -0.736920000 | -1.726314000 | -3.121800000 |
| C  | 1.326523000  | -1.671278000 | -1.864228000 |
| C  | 2.039502000  | -1.798664000 | -3.047849000 |
| C  | -0.013291000 | -1.851664000 | -4.297677000 |
| H  | -1.819072000 | -1.683697000 | -3.146325000 |
| H  | 1.843059000  | -1.589680000 | -0.915261000 |
| H  | 3.122532000  | -1.821229000 | -3.016868000 |
| H  | -0.536958000 | -1.911470000 | -5.244320000 |
| H  | 1.936173000  | -1.982004000 | -5.182624000 |
| C  | -0.671979000 | -1.133070000 | 2.786213000  |
| Cl | 2.045814000  | -1.258852000 | 1.496269000  |
| O  | -1.064311000 | -1.823729000 | 3.598283000  |
| Cl | -2.045814000 | 1.258852000  | 1.496269000  |
| C  | 0.671979000  | 1.133070000  | 2.786213000  |
| O  | 1.064311000  | 1.823729000  | 3.598283000  |
| C  | 0.059433000  | 1.641536000  | -1.912553000 |
| C  | -1.373400000 | 1.888843000  | -4.261233000 |
| C  | 0.736920000  | 1.726314000  | -3.121800000 |
| C  | -1.326523000 | 1.671278000  | -1.864228000 |
| C  | -2.039502000 | 1.798664000  | -3.047849000 |
| C  | 0.013291000  | 1.851664000  | -4.297677000 |
| H  | 1.819072000  | 1.683697000  | -3.146325000 |
| H  | -1.843059000 | 1.589680000  | -0.915261000 |
| H  | -3.122532000 | 1.821229000  | -3.016868000 |
| H  | 0.536958000  | 1.911470000  | -5.244320000 |
| H  | -1.936173000 | 1.982004000  | -5.182624000 |
| C  | -1.143818000 | -3.225315000 | 0.336569000  |
| C  | -1.255487000 | -5.763064000 | 1.421053000  |
| C  | -2.342037000 | -3.693904000 | 0.857118000  |
| C  | 0.000000000  | -4.008878000 | 0.350301000  |
| C  | -0.064863000 | -5.284542000 | 0.890318000  |
| C  | -2.391416000 | -4.967203000 | 1.406855000  |
| H  | -3.230021000 | -3.072766000 | 0.835165000  |
| H  | 0.932929000  | -3.630851000 | -0.044966000 |
| H  | 0.824348000  | -5.903808000 | 0.902102000  |
| H  | -3.323703000 | -5.337106000 | 1.816824000  |
| H  | -1.297212000 | -6.759164000 | 1.845470000  |

25

ctc-[RuCl2(CO)2(TeMe2)2] symmetry c1 (E=-1937.36663609)

|    |              |              |              |
|----|--------------|--------------|--------------|
| Ru | -0.025550000 | 0.901890000  | 0.089165000  |
| Te | 1.816492000  | -1.076638000 | -0.201560000 |
| C  | 2.654062000  | -1.310574000 | 1.733962000  |
| C  | 3.463502000  | -0.007839000 | -1.010038000 |
| H  | 1.895558000  | -1.774768000 | 2.359466000  |
| H  | 3.531237000  | -1.948552000 | 1.648898000  |
| H  | 2.911214000  | -0.329646000 | 2.126405000  |
| H  | 3.093247000  | 0.504132000  | -1.895876000 |
| H  | 3.819125000  | 0.706803000  | -0.271147000 |
| H  | 4.242857000  | -0.720878000 | -1.267997000 |
| Te | -1.994197000 | -0.877359000 | -0.545086000 |
| C  | -3.541699000 | -0.230555000 | 0.757779000  |
| C  | -1.506674000 | -2.556865000 | 0.662006000  |
| H  | -3.973072000 | 0.677643000  | 0.341649000  |
| H  | -3.091996000 | -0.038213000 | 1.730102000  |
| H  | -4.293067000 | -1.015477000 | 0.810374000  |
| H  | -2.400770000 | -3.169819000 | 0.757794000  |
| H  | -1.170738000 | -2.184588000 | 1.628152000  |
| H  | -0.722013000 | -3.120192000 | 0.160418000  |
| C  | 1.346715000  | 2.088632000  | 0.499445000  |



|    |              |             |              |
|----|--------------|-------------|--------------|
| O  | 2.177018000  | 2.821585000 | 0.768168000  |
| Cl | 0.279961000  | 1.160345000 | -2.286410000 |
| C  | -1.312357000 | 2.246176000 | 0.169645000  |
| Cl | -0.333200000 | 0.349679000 | 2.402681000  |
| O  | -2.076143000 | 3.090158000 | 0.221917000  |

39

ctc-[RuCl<sub>2</sub>(CO)<sub>2</sub>(TeMePh)<sub>2</sub>] symmetry c2 (E=-2320.53206424)

|    |              |              |              |
|----|--------------|--------------|--------------|
| Ru | 0.000000000  | 0.000000000  | 0.684441000  |
| Te | 0.711419000  | -1.742085000 | -1.294218000 |
| C  | 2.724542000  | -1.274648000 | -1.758706000 |
| H  | 2.687702000  | -0.392712000 | -2.395490000 |
| H  | 3.263539000  | -1.041901000 | -0.844178000 |
| H  | 3.159501000  | -2.113688000 | -2.297743000 |
| Te | -0.711419000 | 1.742085000  | -1.294218000 |
| C  | -2.724542000 | 1.274648000  | -1.758706000 |
| H  | -3.159501000 | 2.113688000  | -2.297743000 |
| H  | -3.263539000 | 1.041901000  | -0.844178000 |
| H  | -2.687702000 | 0.392712000  | -2.395490000 |
| C  | 1.093090000  | -3.491133000 | -0.177246000 |
| C  | -1.093090000 | 3.491133000  | -0.177246000 |
| C  | -1.488483000 | 5.782996000  | 1.329854000  |
| C  | 0.000000000  | 4.255269000  | 0.215531000  |
| C  | -2.381235000 | 3.867788000  | 0.175574000  |
| C  | -2.573931000 | 5.018518000  | 0.928519000  |
| C  | -0.203066000 | 5.398682000  | 0.973794000  |
| H  | 1.006521000  | 3.954961000  | -0.051704000 |
| H  | -3.238816000 | 3.275757000  | -0.117762000 |
| H  | -3.580047000 | 5.311682000  | 1.205160000  |
| H  | 0.649314000  | 5.991484000  | 1.284712000  |
| H  | -1.643798000 | 6.678160000  | 1.920362000  |
| C  | 1.488483000  | -5.782996000 | 1.329854000  |
| C  | 0.000000000  | -4.255269000 | 0.215531000  |
| C  | 2.381235000  | -3.867788000 | 0.175574000  |
| C  | 2.573931000  | -5.018518000 | 0.928519000  |
| C  | 0.203066000  | -5.398682000 | 0.973794000  |
| H  | -1.006521000 | -3.954961000 | -0.051704000 |
| H  | 3.238816000  | -3.275757000 | -0.117762000 |
| H  | 3.580047000  | -5.311682000 | 1.205160000  |
| H  | -0.649314000 | -5.991484000 | 1.284712000  |
| H  | 1.643798000  | -6.678160000 | 1.920362000  |
| C  | 0.674099000  | -1.152132000 | 1.980417000  |
| Cl | 2.075711000  | 1.198870000  | 0.540048000  |
| O  | 1.090673000  | -1.830898000 | 2.793880000  |
| Cl | -2.075711000 | -1.198870000 | 0.540048000  |
| C  | -0.674099000 | 1.152132000  | 1.980417000  |
| O  | -1.090673000 | 1.830898000  | 2.793880000  |

53

ctc-[RuCl<sub>2</sub>(CO)<sub>2</sub>(TePh<sub>2</sub>)<sub>2</sub>] symmetry c2 (E=-2703.70261027)

|    |              |              |              |
|----|--------------|--------------|--------------|
| Ru | 0.000000000  | 0.000000000  | 1.582528000  |
| Te | -1.304676000 | -1.451355000 | -0.323197000 |
| Te | 1.304676000  | 1.451355000  | -0.323197000 |
| C  | -0.031467000 | -1.661472000 | -1.992752000 |
| C  | 1.144542000  | 3.430336000  | 0.403837000  |
| C  | 1.029211000  | 5.988674000  | 1.456712000  |
| C  | 2.232764000  | 3.937099000  | 1.104097000  |
| C  | 0.000000000  | 4.194019000  | 0.224284000  |
| C  | -0.050163000 | 5.477499000  | 0.749404000  |
| C  | 2.168709000  | 5.217694000  | 1.635331000  |
| H  | 3.130569000  | 3.343829000  | 1.239413000  |
| H  | -0.850385000 | 3.799098000  | -0.315747000 |

|    |              |              |              |
|----|--------------|--------------|--------------|
| H  | -0.942126000 | 6.076923000  | 0.608457000  |
| H  | 3.015732000  | 5.612844000  | 2.183860000  |
| H  | 0.982451000  | 6.990207000  | 1.867852000  |
| C  | 1.527226000  | -1.849439000 | -4.272892000 |
| C  | -0.640777000 | -1.721836000 | -3.240213000 |
| C  | 1.352886000  | -1.692056000 | -1.877366000 |
| C  | 2.128910000  | -1.788018000 | -3.024308000 |
| C  | 0.144356000  | -1.817174000 | -4.379953000 |
| H  | -1.720135000 | -1.683119000 | -3.329314000 |
| H  | 1.823841000  | -1.646199000 | -0.901344000 |
| H  | 3.208958000  | -1.811226000 | -2.936898000 |
| H  | -0.328794000 | -1.857152000 | -5.354002000 |
| H  | 2.137527000  | -1.918585000 | -5.165735000 |
| C  | -0.751546000 | -1.104597000 | 2.882053000  |
| Cl | 1.960735000  | -1.395278000 | 1.562077000  |
| O  | -1.186303000 | -1.775019000 | 3.691172000  |
| Cl | -1.960735000 | 1.395278000  | 1.562077000  |
| C  | 0.751546000  | 1.104597000  | 2.882053000  |
| O  | 1.186303000  | 1.775019000  | 3.691172000  |
| C  | 0.031467000  | 1.661472000  | -1.992752000 |
| C  | -1.527226000 | 1.849439000  | -4.272892000 |
| C  | 0.640777000  | 1.721836000  | -3.240213000 |
| C  | -1.352886000 | 1.692056000  | -1.877366000 |
| C  | -2.128910000 | 1.788018000  | -3.024308000 |
| C  | -0.144356000 | 1.817174000  | -4.379953000 |
| H  | 1.720135000  | 1.683119000  | -3.329314000 |
| H  | -1.823841000 | 1.646199000  | -0.901344000 |
| H  | -3.208958000 | 1.811226000  | -2.936898000 |
| H  | 0.328794000  | 1.857152000  | -5.354002000 |
| H  | -2.137527000 | 1.918585000  | -5.165735000 |
| C  | -1.144542000 | -3.430336000 | 0.403837000  |
| C  | -1.029211000 | -5.988674000 | 1.456712000  |
| C  | -2.232764000 | -3.937099000 | 1.104097000  |
| C  | 0.000000000  | -4.194019000 | 0.224284000  |
| C  | 0.050163000  | -5.477499000 | 0.749404000  |
| C  | -2.168709000 | -5.217694000 | 1.635331000  |
| H  | -3.130569000 | -3.343829000 | 1.239413000  |
| H  | 0.850385000  | -3.799098000 | -0.315747000 |
| H  | 0.942126000  | -6.076923000 | 0.608457000  |
| H  | -3.015732000 | -5.612844000 | 2.183860000  |
| H  | -0.982451000 | -6.990207000 | 1.867852000  |

25

ccc-[RuCl2(CO)2(SMe2)2] symmetry c1 (E=-2197.43293862)

|    |              |              |              |
|----|--------------|--------------|--------------|
| Ru | 0.067232000  | 0.394195000  | 0.033802000  |
| S  | -1.577326000 | -1.416666000 | 0.328614000  |
| C  | -2.365549000 | -1.667563000 | -1.259297000 |
| C  | -2.947596000 | -0.712486000 | 1.245523000  |
| H  | -1.612393000 | -2.073065000 | -1.930517000 |
| H  | -3.179419000 | -2.379059000 | -1.122140000 |
| H  | -2.726195000 | -0.713265000 | -1.640359000 |
| H  | -2.617315000 | -0.557204000 | 2.271445000  |
| H  | -3.245339000 | 0.232614000  | 0.792586000  |
| H  | -3.769594000 | -1.427301000 | 1.235968000  |
| S  | 1.751600000  | -0.976078000 | 1.010221000  |
| C  | 3.293921000  | -0.566672000 | 0.192438000  |
| C  | 1.554060000  | -2.654132000 | 0.409134000  |
| H  | 3.584518000  | 0.431905000  | 0.514655000  |
| H  | 3.156626000  | -0.597468000 | -0.887796000 |
| H  | 4.048460000  | -1.284016000 | 0.514021000  |
| H  | 2.424918000  | -3.223940000 | 0.732819000  |
| H  | 1.464959000  | -2.648298000 | -0.676285000 |

|    |              |              |              |
|----|--------------|--------------|--------------|
| H  | 0.656411000  | -3.067201000 | 0.863852000  |
| C  | 1.260758000  | 1.794765000  | -0.296694000 |
| O  | 1.944173000  | 2.671294000  | -0.526806000 |
| Cl | -1.672528000 | 1.721386000  | -0.963152000 |
| Cl | 0.661431000  | -0.508048000 | -2.142749000 |
| C  | -0.359432000 | 1.100347000  | 1.685665000  |
| O  | -0.614244000 | 1.560373000  | 2.697156000  |

39

ccc-[RuCl2(CO)2(SMePh)2] symmetry c1 (E=-2580.60473914)

|    |              |              |              |
|----|--------------|--------------|--------------|
| Ru | -1.350237000 | 0.018673000  | 0.330003000  |
| S  | -0.564567000 | 2.266083000  | 0.086498000  |
| C  | -0.976730000 | 2.884357000  | -1.540304000 |
| H  | -2.058026000 | 2.992262000  | -1.550661000 |
| H  | -0.493761000 | 3.853317000  | -1.661162000 |
| H  | -0.681760000 | 2.187933000  | -2.322574000 |
| Cl | -2.162363000 | -2.225310000 | 0.552407000  |
| C  | -0.103739000 | -0.411835000 | 1.632983000  |
| S  | 0.164311000  | -0.676260000 | -1.486749000 |
| O  | 0.619571000  | -0.729650000 | 2.452756000  |
| C  | -0.739440000 | -1.801155000 | -2.548207000 |
| H  | -1.286373000 | -2.531507000 | -1.956229000 |
| H  | -0.029577000 | -2.271462000 | -3.226837000 |
| H  | -1.444653000 | -1.181841000 | -3.098295000 |
| C  | 1.209420000  | 2.276546000  | 0.063355000  |
| C  | 1.398491000  | -1.715646000 | -0.750518000 |
| C  | 3.376471000  | -3.196593000 | 0.500146000  |
| C  | 1.163011000  | -3.048992000 | -0.439069000 |
| C  | 2.616823000  | -1.121289000 | -0.444979000 |
| C  | 3.600965000  | -1.863563000 | 0.188921000  |
| C  | 2.160501000  | -3.785666000 | 0.180706000  |
| H  | 0.206801000  | -3.505113000 | -0.654765000 |
| H  | 2.793153000  | -0.083587000 | -0.698091000 |
| H  | 4.547941000  | -1.395846000 | 0.431311000  |
| H  | 1.979440000  | -4.826084000 | 0.423492000  |
| H  | 4.148387000  | -3.778026000 | 0.990141000  |
| C  | 3.979888000  | 2.332039000  | 0.199825000  |
| C  | 1.846602000  | 2.167984000  | 1.296180000  |
| C  | 1.953550000  | 2.425258000  | -1.099714000 |
| C  | 3.339575000  | 2.460314000  | -1.022920000 |
| C  | 3.229241000  | 2.182856000  | 1.358825000  |
| H  | 1.263205000  | 2.079775000  | 2.205301000  |
| H  | 1.473254000  | 2.510129000  | -2.064187000 |
| H  | 3.917261000  | 2.578318000  | -1.931848000 |
| H  | 3.720425000  | 2.089946000  | 2.319818000  |
| H  | 5.061693000  | 2.351616000  | 0.251660000  |
| C  | -2.572979000 | 0.573514000  | 1.625772000  |
| Cl | -3.041872000 | 0.417142000  | -1.355470000 |
| O  | -3.334671000 | 0.887336000  | 2.406348000  |

53

ccc-[RuCl2(CO)2(SPh)2] symmetry c1 (E=-2963.77000594)

|    |              |              |              |
|----|--------------|--------------|--------------|
| Ru | -0.137190000 | 1.382947000  | 0.037069000  |
| S  | 1.264193000  | -0.533544000 | 0.000408000  |
| Cl | -1.573194000 | 3.292937000  | -0.183897000 |
| C  | -0.848690000 | 1.023915000  | 1.712217000  |
| S  | -1.930945000 | 0.173817000  | -1.213951000 |
| O  | -1.292258000 | 0.826515000  | 2.742202000  |
| C  | 2.908907000  | -0.134687000 | -0.546192000 |
| C  | -3.440698000 | -0.127299000 | -0.317299000 |
| C  | -5.890496000 | -0.488657000 | 0.935047000  |
| C  | -3.871519000 | 0.788294000  | 0.633097000  |

|    |              |              |              |
|----|--------------|--------------|--------------|
| C  | -4.245165000 | -1.207188000 | -0.668066000 |
| C  | -5.462873000 | -1.387175000 | -0.032743000 |
| C  | -5.095872000 | 0.600623000  | 1.257465000  |
| H  | -3.270281000 | 1.657793000  | 0.863883000  |
| H  | -3.923698000 | -1.908229000 | -1.427359000 |
| H  | -6.081292000 | -2.235093000 | -0.302566000 |
| H  | -5.424826000 | 1.315608000  | 2.002257000  |
| H  | -6.843284000 | -0.634325000 | 1.429784000  |
| C  | 5.425801000  | 0.409885000  | -1.547740000 |
| C  | 3.217463000  | -0.487652000 | -1.853330000 |
| C  | 3.849191000  | 0.479960000  | 0.268132000  |
| C  | 5.110409000  | 0.749136000  | -0.238589000 |
| C  | 4.480190000  | -0.208395000 | -2.352671000 |
| H  | 2.471271000  | -0.972256000 | -2.470431000 |
| H  | 3.613007000  | 0.739184000  | 1.291749000  |
| H  | 5.848562000  | 1.227345000  | 0.394034000  |
| H  | 4.724161000  | -0.479357000 | -3.372851000 |
| H  | 6.413201000  | 0.624707000  | -1.938762000 |
| C  | 1.161291000  | 2.498257000  | 0.752975000  |
| Cl | 0.699734000  | 1.802566000  | -2.187690000 |
| O  | 1.927796000  | 3.219942000  | 1.178732000  |
| C  | 1.571932000  | -1.219453000 | 1.609497000  |
| C  | -1.334826000 | -1.459725000 | -1.545948000 |
| C  | -0.177623000 | -3.905514000 | -2.117849000 |
| C  | -0.741413000 | -1.664390000 | -2.783408000 |
| C  | -1.353506000 | -2.467717000 | -0.588888000 |
| C  | -0.785925000 | -3.694426000 | -0.886203000 |
| C  | -0.152148000 | -2.890091000 | -3.061457000 |
| H  | -0.727341000 | -0.864784000 | -3.513579000 |
| H  | -1.802949000 | -2.293575000 | 0.381165000  |
| H  | -0.804092000 | -4.484666000 | -0.144945000 |
| H  | 0.318881000  | -3.050532000 | -4.023849000 |
| H  | 0.274872000  | -4.864458000 | -2.340536000 |
| C  | 2.075035000  | -2.456219000 | 4.033717000  |
| C  | 1.676196000  | -2.604628000 | 1.668953000  |
| C  | 1.715852000  | -0.450793000 | 2.756783000  |
| C  | 1.968865000  | -1.074017000 | 3.968538000  |
| C  | 1.929237000  | -3.220279000 | 2.884585000  |
| H  | 1.556195000  | -3.191011000 | 0.766262000  |
| H  | 1.631678000  | 0.626983000  | 2.716869000  |
| H  | 2.080825000  | -0.474546000 | 4.863774000  |
| H  | 2.007652000  | -4.299720000 | 2.932371000  |
| H  | 2.268689000  | -2.938876000 | 4.984198000  |

25

ccc-[RuCl2(CO)2(SeMe2)2] symmetry c1 (E=-6203.84128413)

|    |              |              |              |
|----|--------------|--------------|--------------|
| Ru | 0.069572000  | 0.635180000  | 0.021041000  |
| Se | -1.672032000 | -1.262968000 | 0.139401000  |
| C  | -2.650040000 | -1.101345000 | -1.518948000 |
| C  | -3.044615000 | -0.552316000 | 1.303529000  |
| H  | -1.976941000 | -1.411629000 | -2.313409000 |
| H  | -3.514191000 | -1.759971000 | -1.456017000 |
| H  | -2.935371000 | -0.059588000 | -1.647494000 |
| H  | -2.662381000 | -0.584816000 | 2.321774000  |
| H  | -3.258808000 | 0.470609000  | 0.999613000  |
| H  | -3.923149000 | -1.188058000 | 1.214911000  |
| Se | 1.864090000  | -0.971049000 | 0.678880000  |
| C  | 3.400272000  | -0.405076000 | -0.353286000 |
| C  | 1.526675000  | -2.596177000 | -0.317736000 |
| H  | 3.768027000  | 0.519560000  | 0.086578000  |
| H  | 3.086450000  | -0.251965000 | -1.383882000 |
| H  | 4.157412000  | -1.182929000 | -0.273762000 |

|    |              |              |              |
|----|--------------|--------------|--------------|
| H  | 2.425290000  | -3.206856000 | -0.249474000 |
| H  | 1.295169000  | -2.330180000 | -1.347031000 |
| H  | 0.690167000  | -3.106213000 | 0.153767000  |
| C  | 1.289021000  | 2.037279000  | -0.158483000 |
| O  | 1.997107000  | 2.916692000  | -0.284119000 |
| Cl | -1.696050000 | 2.132833000  | -0.634413000 |
| Cl | 0.466089000  | 0.060560000  | -2.308447000 |
| C  | -0.241715000 | 1.063823000  | 1.787173000  |
| O  | -0.435989000 | 1.350298000  | 2.874391000  |

39

ccc-[RuCl2(CO)2(SeMePh)2] symmetry c1 (E=-6587.01127711)

|    |              |              |              |
|----|--------------|--------------|--------------|
| Ru | 1.367071000  | 0.267486000  | 0.431319000  |
| Se | 0.889295000  | -2.175746000 | 0.159369000  |
| C  | 1.302914000  | -2.647469000 | -1.666505000 |
| H  | 2.386284000  | -2.616113000 | -1.736627000 |
| H  | 0.928442000  | -3.655199000 | -1.835985000 |
| H  | 0.870623000  | -1.928363000 | -2.357761000 |
| Cl | 1.866496000  | 2.603738000  | 0.673721000  |
| C  | 0.082679000  | 0.488949000  | 1.743786000  |
| Se | -0.314595000 | 0.771718000  | -1.449278000 |
| O  | -0.684084000 | 0.675237000  | 2.566010000  |
| C  | 0.449508000  | 2.253614000  | -2.425421000 |
| H  | 0.865978000  | 2.973577000  | -1.726072000 |
| H  | -0.334531000 | 2.678813000  | -3.048076000 |
| H  | 1.242181000  | 1.821779000  | -3.031658000 |
| C  | -1.022346000 | -2.360989000 | 0.118111000  |
| C  | -1.769828000 | 1.650359000  | -0.562858000 |
| C  | -3.888208000 | 2.778272000  | 0.810888000  |
| C  | -2.915245000 | 0.901111000  | -0.333907000 |
| C  | -1.670739000 | 2.959313000  | -0.112486000 |
| C  | -2.739952000 | 3.520800000  | 0.569606000  |
| C  | -3.972641000 | 1.468433000  | 0.362084000  |
| H  | -2.982990000 | -0.119725000 | -0.689199000 |
| H  | -0.764329000 | 3.529973000  | -0.265331000 |
| H  | -2.668294000 | 4.542775000  | 0.922947000  |
| H  | -4.865240000 | 0.882269000  | 0.547103000  |
| H  | -4.716623000 | 3.221888000  | 1.350413000  |
| C  | -3.772137000 | -2.688847000 | 0.215215000  |
| C  | -1.680982000 | -2.312879000 | 1.341452000  |
| C  | -1.728755000 | -2.578582000 | -1.055982000 |
| C  | -3.106427000 | -2.748730000 | -0.999324000 |
| C  | -3.056949000 | -2.466997000 | 1.384592000  |
| H  | -1.126474000 | -2.162148000 | 2.260401000  |
| H  | -1.229085000 | -2.617843000 | -2.013958000 |
| H  | -3.657482000 | -2.920578000 | -1.916294000 |
| H  | -3.569085000 | -2.422078000 | 2.338170000  |
| H  | -4.847367000 | -2.815517000 | 0.252032000  |
| C  | 2.674755000  | -0.121357000 | 1.703984000  |
| Cl | 3.032416000  | 0.116823000  | -1.324255000 |
| O  | 3.481791000  | -0.330919000 | 2.475042000  |

53

ccc-[RuCl2(CO)2(SePh2)2] symmetry c1 (E=-6970.17660244)

|    |              |              |              |
|----|--------------|--------------|--------------|
| Ru | -0.022336000 | 1.404048000  | 0.283708000  |
| Se | 1.381794000  | -0.564308000 | -0.324466000 |
| Cl | -1.362164000 | 3.383505000  | 0.521703000  |
| C  | -0.697733000 | 0.740358000  | 1.870703000  |
| Se | -2.023621000 | 0.546626000  | -1.118515000 |
| O  | -1.137414000 | 0.356490000  | 2.849934000  |
| C  | 3.202271000  | 0.057178000  | -0.462801000 |
| C  | -3.538886000 | 0.098221000  | -0.015748000 |

|    |              |              |              |
|----|--------------|--------------|--------------|
| C  | -5.821329000 | -0.418350000 | 1.464113000  |
| C  | -3.853289000 | 0.909966000  | 1.064434000  |
| C  | -4.370033000 | -0.953279000 | -0.380241000 |
| C  | -5.507354000 | -1.211961000 | 0.369650000  |
| C  | -4.996884000 | 0.643913000  | 1.803810000  |
| H  | -3.220975000 | 1.751813000  | 1.319278000  |
| H  | -4.136285000 | -1.572700000 | -1.236852000 |
| H  | -6.151469000 | -2.037575000 | 0.090624000  |
| H  | -5.239365000 | 1.274153000  | 2.651352000  |
| H  | -6.710887000 | -0.624921000 | 2.047219000  |
| C  | 5.794138000  | 0.946269000  | -0.822719000 |
| C  | 3.640009000  | 0.390879000  | -1.737381000 |
| C  | 4.048495000  | 0.150934000  | 0.630897000  |
| C  | 5.348501000  | 0.597460000  | 0.444268000  |
| C  | 4.940182000  | 0.841181000  | -1.911180000 |
| H  | 2.970976000  | 0.308401000  | -2.584027000 |
| H  | 3.712885000  | -0.124917000 | 1.621799000  |
| H  | 6.012819000  | 0.672825000  | 1.296966000  |
| H  | 5.285009000  | 1.105601000  | -2.903745000 |
| H  | 6.810195000  | 1.295831000  | -0.962260000 |
| C  | 1.379909000  | 2.259598000  | 1.157251000  |
| Cl | 0.721834000  | 2.182502000  | -1.888887000 |
| O  | 2.210189000  | 2.814479000  | 1.698097000  |
| C  | 1.588333000  | -1.761620000 | 1.161933000  |
| C  | -1.525028000 | -1.207002000 | -1.708830000 |
| C  | -0.638657000 | -3.656423000 | -2.632165000 |
| C  | -1.122451000 | -1.334174000 | -3.029794000 |
| C  | -1.484844000 | -2.290816000 | -0.840901000 |
| C  | -1.051267000 | -3.519067000 | -1.312825000 |
| C  | -0.670112000 | -2.564887000 | -3.486636000 |
| H  | -1.154282000 | -0.479950000 | -3.695338000 |
| H  | -1.788183000 | -2.181528000 | 0.193376000  |
| H  | -1.022657000 | -4.368657000 | -0.640961000 |
| H  | -0.349307000 | -2.667987000 | -4.516318000 |
| H  | -0.292395000 | -4.617500000 | -2.993217000 |
| C  | 1.903612000  | -3.613836000 | 3.190948000  |
| C  | 1.707138000  | -3.109426000 | 0.849074000  |
| C  | 1.630884000  | -1.332739000 | 2.480446000  |
| C  | 1.790255000  | -2.264683000 | 3.495136000  |
| C  | 1.864333000  | -4.035269000 | 1.869428000  |
| H  | 1.671708000  | -3.433371000 | -0.183966000 |
| H  | 1.549363000  | -0.282195000 | 2.725753000  |
| H  | 1.823864000  | -1.931778000 | 4.525502000  |
| H  | 1.953284000  | -5.087863000 | 1.628592000  |
| H  | 2.022884000  | -4.339041000 | 3.987075000  |

25

ccc-[RuCl2(CO)2(TeMe2)2] symmetry c1 (E=-1937.37495054)

|    |              |              |              |
|----|--------------|--------------|--------------|
| Ru | 0.064629000  | 0.835562000  | 0.023071000  |
| Te | -1.795540000 | -1.157524000 | 0.075188000  |
| C  | -2.923769000 | -0.690649000 | -1.654575000 |
| C  | -3.210546000 | -0.349516000 | 1.435337000  |
| H  | -2.313687000 | -0.956422000 | -2.513881000 |
| H  | -3.838929000 | -1.278401000 | -1.622038000 |
| H  | -3.117067000 | 0.379508000  | -1.637004000 |
| H  | -2.812384000 | -0.461569000 | 2.441899000  |
| H  | -3.342840000 | 0.700788000  | 1.182193000  |
| H  | -4.138900000 | -0.907097000 | 1.332444000  |
| Te | 2.006019000  | -0.878023000 | 0.538532000  |
| C  | 3.527742000  | -0.156805000 | -0.751568000 |
| C  | 1.554091000  | -2.541431000 | -0.700278000 |
| H  | 3.938674000  | 0.749781000  | -0.312032000 |

|    |              |              |              |
|----|--------------|--------------|--------------|
| H  | 3.067221000  | 0.047710000  | -1.716029000 |
| H  | 4.296442000  | -0.923563000 | -0.824006000 |
| H  | 2.470503000  | -3.118060000 | -0.813458000 |
| H  | 1.198821000  | -2.157515000 | -1.654518000 |
| H  | 0.793068000  | -3.139837000 | -0.204179000 |
| C  | 1.297000000  | 2.237891000  | -0.125292000 |
| O  | 2.015303000  | 3.113851000  | -0.221855000 |
| Cl | -1.728203000 | 2.382452000  | -0.491753000 |
| Cl | 0.348295000  | 0.347487000  | -2.352062000 |
| C  | -0.196016000 | 1.151731000  | 1.816856000  |
| O  | -0.368057000 | 1.365159000  | 2.926104000  |

39

ccc-[RuCl<sub>2</sub>(CO)<sub>2</sub>(TeMePh)<sub>2</sub>] symmetry c1 (E=-2320.54384165)

|    |              |              |              |
|----|--------------|--------------|--------------|
| Ru | 1.363841000  | 0.641864000  | 0.482853000  |
| Te | 1.364650000  | -1.990742000 | 0.237333000  |
| C  | 1.746136000  | -2.350749000 | -1.813818000 |
| H  | 2.797727000  | -2.122063000 | -1.966120000 |
| H  | 1.542812000  | -3.402348000 | -2.007207000 |
| H  | 1.134274000  | -1.696038000 | -2.429618000 |
| Cl | 1.387685000  | 3.049400000  | 0.705271000  |
| C  | 0.173739000  | 0.580182000  | 1.889335000  |
| Te | -0.582647000 | 0.781886000  | -1.397047000 |
| O  | -0.549683000 | 0.579271000  | 2.772322000  |
| C  | -0.268969000 | 2.696367000  | -2.248176000 |
| H  | -0.174846000 | 3.423134000  | -1.446244000 |
| H  | -1.109725000 | 2.906073000  | -2.905548000 |
| H  | 0.662626000  | 2.627976000  | -2.806057000 |
| C  | -0.695298000 | -2.468657000 | 0.190528000  |
| C  | -2.318006000 | 1.284084000  | -0.309730000 |
| C  | -4.594323000 | 1.870648000  | 1.152638000  |
| C  | -3.431873000 | 0.461873000  | -0.411520000 |
| C  | -2.332230000 | 2.398146000  | 0.521368000  |
| C  | -3.477407000 | 2.691374000  | 1.246352000  |
| C  | -4.569871000 | 0.755833000  | 0.327954000  |
| H  | -3.416093000 | -0.409194000 | -1.055371000 |
| H  | -1.450333000 | 3.022135000  | 0.619799000  |
| H  | -3.492574000 | 3.559623000  | 1.894974000  |
| H  | -5.437791000 | 0.110681000  | 0.255024000  |
| H  | -5.484334000 | 2.100699000  | 1.726669000  |
| C  | -3.387178000 | -3.138902000 | 0.251371000  |
| C  | -1.384903000 | -2.462652000 | 1.398855000  |
| C  | -1.347578000 | -2.813554000 | -0.986419000 |
| C  | -2.694457000 | -3.152723000 | -0.949159000 |
| C  | -2.731349000 | -2.790398000 | 1.424159000  |
| H  | -0.881666000 | -2.208200000 | 2.324647000  |
| H  | -0.825490000 | -2.828156000 | -1.934215000 |
| H  | -3.200364000 | -3.423191000 | -1.868631000 |
| H  | -3.266670000 | -2.777630000 | 2.366132000  |
| H  | -4.438917000 | -3.398133000 | 0.274329000  |
| C  | 2.839784000  | 0.550063000  | 1.636170000  |
| Cl | 2.831611000  | 0.810444000  | -1.456169000 |
| O  | 3.735038000  | 0.526999000  | 2.335529000  |

53

ccc-[RuCl<sub>2</sub>(CO)<sub>2</sub>(TePh<sub>2</sub>)<sub>2</sub>] symmetry c1 (E=-2703.71288416)

|    |              |              |              |
|----|--------------|--------------|--------------|
| Ru | 0.054570000  | 1.450045000  | 0.354043000  |
| Te | 1.480462000  | -0.548180000 | -0.573778000 |
| Cl | -1.322008000 | 3.379866000  | 0.848384000  |
| C  | -0.467198000 | 0.595546000  | 1.898990000  |
| Te | -2.171341000 | 0.726532000  | -1.007616000 |
| O  | -0.797198000 | 0.073851000  | 2.858758000  |

|    |              |              |              |
|----|--------------|--------------|--------------|
| C  | 3.493179000  | 0.116738000  | -0.422178000 |
| C  | -3.615912000 | 0.090280000  | 0.402521000  |
| C  | -5.608066000 | -0.636375000 | 2.186720000  |
| C  | -3.772181000 | 0.800111000  | 1.585932000  |
| C  | -4.464919000 | -0.966263000 | 0.094970000  |
| C  | -5.455754000 | -1.331159000 | 0.994921000  |
| C  | -4.770015000 | 0.430441000  | 2.476930000  |
| H  | -3.126502000 | 1.641307000  | 1.811462000  |
| H  | -4.357596000 | -1.512067000 | -0.834790000 |
| H  | -6.112277000 | -2.160520000 | 0.758563000  |
| H  | -4.888130000 | 0.980888000  | 3.403060000  |
| H  | -6.383408000 | -0.924247000 | 2.886920000  |
| C  | 6.142033000  | 0.927360000  | -0.342299000 |
| C  | 3.844725000  | 1.367291000  | -0.913508000 |
| C  | 4.459458000  | -0.737994000 | 0.092810000  |
| C  | 5.784111000  | -0.325447000 | 0.134212000  |
| C  | 5.171985000  | 1.769362000  | -0.866949000 |
| H  | 3.089936000  | 2.028115000  | -1.324412000 |
| H  | 4.191966000  | -1.716952000 | 0.471018000  |
| H  | 6.536458000  | -0.989752000 | 0.543384000  |
| H  | 5.444707000  | 2.748891000  | -1.242277000 |
| H  | 7.176885000  | 1.246776000  | -0.305647000 |
| C  | 1.517182000  | 2.231534000  | 1.225477000  |
| Cl | 0.610744000  | 2.401448000  | -1.835412000 |
| O  | 2.363385000  | 2.729498000  | 1.797507000  |
| C  | 1.658404000  | -1.937944000 | 1.005059000  |
| C  | -1.729440000 | -1.192569000 | -1.769532000 |
| C  | -1.013551000 | -3.645640000 | -2.841552000 |
| C  | -1.450196000 | -1.297676000 | -3.126565000 |
| C  | -1.644799000 | -2.307537000 | -0.942993000 |
| C  | -1.299166000 | -3.535556000 | -1.487046000 |
| C  | -1.083742000 | -2.527006000 | -3.658236000 |
| H  | -1.513409000 | -0.428531000 | -3.771361000 |
| H  | -1.851597000 | -2.226970000 | 0.117850000  |
| H  | -1.244973000 | -4.407550000 | -0.845756000 |
| H  | -0.861081000 | -2.608353000 | -4.715558000 |
| H  | -0.736573000 | -4.605997000 | -3.259918000 |
| C  | 1.907381000  | -3.825676000 | 3.015378000  |
| C  | 1.469831000  | -3.282516000 | 0.715004000  |
| C  | 1.983519000  | -1.532761000 | 2.294040000  |
| C  | 2.108572000  | -2.480252000 | 3.297329000  |
| C  | 1.590765000  | -4.226540000 | 1.726458000  |
| H  | 1.230987000  | -3.598172000 | -0.293398000 |
| H  | 2.149954000  | -0.486579000 | 2.520925000  |
| H  | 2.361393000  | -2.165513000 | 4.302910000  |
| H  | 1.440602000  | -5.275919000 | 1.501578000  |
| H  | 2.001984000  | -4.562806000 | 3.804005000  |

25

ttt-[RuCl2(CO)2(SMe2)2] symmetry c2v (E=-2197.41399505 )

|    |              |              |              |
|----|--------------|--------------|--------------|
| Ru | 0.000000000  | 0.000000000  | 0.191003000  |
| C  | 0.000000000  | -1.928981000 | 0.245206000  |
| O  | 0.000000000  | -3.059605000 | 0.312809000  |
| S  | -2.381536000 | 0.000000000  | 0.241431000  |
| S  | 2.381536000  | 0.000000000  | 0.241431000  |
| C  | -2.943138000 | 1.359647000  | -0.787225000 |
| C  | -2.943138000 | -1.359647000 | -0.787225000 |
| C  | 2.943138000  | 1.359647000  | -0.787225000 |
| C  | 2.943138000  | -1.359647000 | -0.787225000 |
| H  | -4.019663000 | 1.260259000  | -0.923971000 |
| H  | -2.733824000 | 2.287094000  | -0.256765000 |
| H  | -2.423200000 | 1.340357000  | -1.744180000 |



|    |              |              |              |
|----|--------------|--------------|--------------|
| H  | -4.019663000 | -1.260259000 | -0.923971000 |
| H  | -2.423200000 | -1.340357000 | -1.744180000 |
| H  | -2.733824000 | -2.287094000 | -0.256765000 |
| H  | 2.733824000  | 2.287094000  | -0.256765000 |
| H  | 4.019663000  | 1.260259000  | -0.923971000 |
| H  | 2.423200000  | 1.340357000  | -1.744180000 |
| H  | 2.733824000  | -2.287094000 | -0.256765000 |
| H  | 2.423200000  | -1.340357000 | -1.744180000 |
| H  | 4.019663000  | -1.260259000 | -0.923971000 |
| Cl | 0.000000000  | 0.000000000  | -2.215107000 |
| Cl | 0.000000000  | 0.000000000  | 2.598383000  |
| C  | 0.000000000  | 1.928981000  | 0.245206000  |
| O  | 0.000000000  | 3.059605000  | 0.312809000  |

39

ttt-[RuCl<sub>2</sub>(CO)<sub>2</sub>(SMePh)<sub>2</sub>] symmetry c2 (E=-2580.58488248)

|    |              |              |              |
|----|--------------|--------------|--------------|
| Ru | 0.000000000  | 0.000000000  | 0.294615000  |
| Cl | -0.000001000 | 0.000005000  | -2.115745000 |
| C  | -1.196418000 | 1.519351000  | 0.311487000  |
| O  | -1.889339000 | 2.413633000  | 0.336251000  |
| S  | 1.837531000  | 1.510213000  | 0.418254000  |
| S  | -1.837531000 | -1.510215000 | 0.418248000  |
| C  | 3.311117000  | 0.636064000  | -0.041678000 |
| C  | -3.311117000 | -0.636064000 | -0.041680000 |
| C  | 5.608433000  | -0.794989000 | -0.608069000 |
| C  | 3.549743000  | 0.212814000  | -1.343761000 |
| C  | 4.210100000  | 0.348820000  | 0.977268000  |
| C  | 5.357969000  | -0.375556000 | 0.689892000  |
| C  | 4.706049000  | -0.497569000 | -1.621697000 |
| H  | 2.826506000  | 0.411377000  | -2.124548000 |
| H  | 4.009041000  | 0.687575000  | 1.986720000  |
| H  | 6.059143000  | -0.604888000 | 1.483322000  |
| H  | 4.897770000  | -0.829460000 | -2.635234000 |
| H  | 6.507842000  | -1.356197000 | -0.832036000 |
| C  | -5.608433000 | 0.794991000  | -0.608065000 |
| C  | -4.210100000 | -0.348824000 | 0.977267000  |
| C  | -3.549743000 | -0.212809000 | -1.343762000 |
| C  | -4.706049000 | 0.497575000  | -1.621694000 |
| C  | -5.357970000 | 0.375552000  | 0.689893000  |
| H  | -4.009042000 | -0.687584000 | 1.986718000  |
| H  | -2.826505000 | -0.411369000 | -2.124549000 |
| H  | -4.897770000 | 0.829471000  | -2.635231000 |
| H  | -6.059143000 | 0.604881000  | 1.483325000  |
| H  | -6.507843000 | 1.356200000  | -0.832031000 |
| C  | 1.196418000  | -1.519352000 | 0.311479000  |
| Cl | 0.000001000  | -0.000006000 | 2.700333000  |
| O  | 1.889339000  | -2.413634000 | 0.336238000  |
| C  | -1.697960000 | -2.713381000 | -0.908328000 |
| C  | 1.697961000  | 2.713385000  | -0.908318000 |
| H  | -0.893930000 | -3.392108000 | -0.624787000 |
| H  | -1.454036000 | -2.227358000 | -1.849891000 |
| H  | -2.636651000 | -3.262158000 | -0.966770000 |
| H  | 2.636652000  | 3.262162000  | -0.966758000 |
| H  | 0.893930000  | 3.392110000  | -0.624774000 |
| H  | 1.454036000  | 2.227366000  | -1.849882000 |

53

ttt-[RuCl<sub>2</sub>(CO)<sub>2</sub>(SPh<sub>2</sub>)<sub>2</sub>] symmetry cs (E=-2963.75171683)

|    |              |              |             |
|----|--------------|--------------|-------------|
| Ru | -0.008697819 | 0.629624383  | 0.000000000 |
| Cl | -0.136217013 | -1.776110051 | 0.000000000 |
| C  | -1.948616789 | 0.619859119  | 0.000000000 |
| O  | -3.078572271 | 0.610015163  | 0.000000000 |

|    |              |              |              |
|----|--------------|--------------|--------------|
| S  | -0.021302290 | 0.803211237  | -2.375609054 |
| S  | -0.021302290 | 0.803211237  | 2.375609054  |
| C  | 1.402265195  | 0.058306278  | -3.135890555 |
| C  | -1.361867202 | -0.147052183 | -3.056810002 |
| C  | -1.361867202 | -0.147052183 | 3.056810002  |
| C  | 1.402265195  | 0.058306278  | 3.135890555  |
| C  | 3.621325592  | -0.967726848 | -4.427206060 |
| C  | 2.051390776  | -1.048281131 | -2.605000035 |
| C  | 1.856641465  | 0.659030506  | -4.304933578 |
| C  | 2.967589803  | 0.139306327  | -4.950598079 |
| C  | 3.163752671  | -1.557766199 | -3.257456039 |
| H  | 1.680475226  | -1.508517651 | -1.696436518 |
| H  | 1.344780171  | 1.528099992  | -4.700720594 |
| H  | 3.326159242  | 0.606256859  | -5.860053596 |
| H  | 3.673369527  | -2.421434002 | -2.847058024 |
| H  | 4.492627058  | -1.369223096 | -4.931053562 |
| C  | -3.559082642 | -1.481792221 | -4.073184438 |
| C  | -2.522571327 | 0.560429666  | -3.346223535 |
| C  | -1.286483157 | -1.514971235 | -3.277955938 |
| C  | -2.389691147 | -2.176565964 | -3.793304407 |
| C  | -3.625112236 | -0.114563303 | -3.847541503 |
| H  | -2.561071308 | 1.630914244  | -3.180285587 |
| H  | -0.380371726 | -2.058033594 | -3.047969412 |
| H  | -2.335467251 | -3.244145728 | -3.970625856 |
| H  | -4.532130562 | 0.433928314  | -4.071686528 |
| H  | -4.418530979 | -2.007237464 | -4.472303413 |
| C  | -3.559082642 | -1.481792221 | 4.073184438  |
| C  | -2.522571327 | 0.560429666  | 3.346223535  |
| C  | -1.286483157 | -1.514971235 | 3.277955938  |
| C  | -2.389691147 | -2.176565964 | 3.793304407  |
| C  | -3.625112236 | -0.114563303 | 3.847541503  |
| H  | -2.561071308 | 1.630914244  | 3.180285587  |
| H  | -0.380371726 | -2.058033594 | 3.047969412  |
| H  | -2.335467251 | -3.244145728 | 3.970625856  |
| H  | -4.532130562 | 0.433928314  | 4.071686528  |
| H  | -4.418530979 | -2.007237464 | 4.472303413  |
| C  | 3.621325592  | -0.967726848 | 4.427206060  |
| C  | 2.051390776  | -1.048281131 | 2.605000035  |
| C  | 1.856641465  | 0.659030506  | 4.304933578  |
| C  | 2.967589803  | 0.139306327  | 4.950598079  |
| C  | 3.163752671  | -1.557766199 | 3.257456039  |
| H  | 1.680475226  | -1.508517651 | 1.696436518  |
| H  | 1.344780171  | 1.528099992  | 4.700720594  |
| H  | 3.326159242  | 0.606256859  | 5.860053596  |
| H  | 3.673369527  | -2.421434002 | 2.847058024  |
| H  | 4.492627058  | -1.369223096 | 4.931053562  |
| C  | 1.922337532  | 0.722373269  | 0.000000000  |
| Cl | -0.010650091 | 3.035984026  | 0.000000000  |
| O  | 3.046038148  | 0.857018031  | 0.000000000  |

25

ttt-[RuCl2(CO)2(SeMe2)2] symmetry cs (E=-6203.82418568)

|    |              |              |              |
|----|--------------|--------------|--------------|
| Ru | 0.137339000  | 0.113262000  | 0.000000000  |
| C  | 1.394302000  | -1.345935000 | 0.000000000  |
| O  | 2.147630000  | -2.193290000 | 0.000000000  |
| Se | 0.185174000  | 0.152043000  | 2.491991000  |
| Se | 0.185174000  | 0.152043000  | -2.491991000 |
| C  | -1.646885000 | 0.507163000  | 3.012861000  |
| C  | 0.185174000  | -1.714067000 | 3.011978000  |
| C  | -1.646885000 | 0.507163000  | -3.012861000 |
| C  | 0.185174000  | -1.714067000 | -3.011978000 |
| H  | -1.737395000 | 0.301312000  | 4.077808000  |

|    |              |              |              |
|----|--------------|--------------|--------------|
| H  | -1.845204000 | 1.559603000  | 2.819996000  |
| H  | -2.305762000 | -0.127985000 | 2.424240000  |
| H  | -0.035767000 | -1.764736000 | 4.076536000  |
| H  | -0.562311000 | -2.239752000 | 2.421370000  |
| H  | 1.181226000  | -2.107779000 | 2.820110000  |
| H  | -1.845204000 | 1.559603000  | -2.819996000 |
| H  | -1.737395000 | 0.301312000  | -4.077808000 |
| H  | -2.305762000 | -0.127985000 | -2.424240000 |
| H  | 1.181226000  | -2.107779000 | -2.820110000 |
| H  | -0.562311000 | -2.239752000 | -2.421370000 |
| H  | -0.035767000 | -1.764736000 | -4.076536000 |
| Cl | -1.711629000 | -1.429929000 | 0.000000000  |
| Cl | 1.985775000  | 1.659349000  | 0.000000000  |
| C  | -1.076920000 | 1.608357000  | 0.000000000  |
| O  | -1.778699000 | 2.498838000  | 0.000000000  |

39

ttt-[RuCl2(CO)2(SeMePh)2] symmetry c2 (E=-6586.99203641)

|    |              |              |              |
|----|--------------|--------------|--------------|
| Ru | 0.000000000  | 0.000000000  | 0.316682000  |
| Cl | 0.000000000  | 0.000000000  | -2.094795000 |
| C  | -1.697008000 | -0.918697000 | 0.319165000  |
| O  | -2.696223000 | -1.452159000 | 0.326318000  |
| Se | -1.221833000 | 2.169536000  | 0.461575000  |
| Se | 1.221833000  | -2.169536000 | 0.461575000  |
| C  | 0.000000000  | 3.515526000  | -0.153710000 |
| C  | 0.000000000  | -3.515526000 | -0.153710000 |
| C  | 1.803303000  | 5.465295000  | -0.915529000 |
| C  | 0.474692000  | 3.532171000  | -1.458128000 |
| C  | 0.418493000  | 4.459436000  | 0.773211000  |
| C  | 1.328974000  | 5.433849000  | 0.387305000  |
| C  | 1.374500000  | 4.516876000  | -1.835423000 |
| H  | 0.168631000  | 2.769378000  | -2.163537000 |
| H  | 0.038958000  | 4.435889000  | 1.788084000  |
| H  | 1.661771000  | 6.171356000  | 1.107981000  |
| H  | 1.748975000  | 4.536632000  | -2.852194000 |
| H  | 2.510737000  | 6.229181000  | -1.215863000 |
| C  | -1.803303000 | -5.465295000 | -0.915529000 |
| C  | -0.418493000 | -4.459436000 | 0.773211000  |
| C  | -0.474692000 | -3.532171000 | -1.458128000 |
| C  | -1.374500000 | -4.516876000 | -1.835423000 |
| C  | -1.328974000 | -5.433849000 | 0.387305000  |
| H  | -0.038958000 | -4.435889000 | 1.788084000  |
| H  | -0.168631000 | -2.769378000 | -2.163537000 |
| H  | -1.748975000 | -4.536632000 | -2.852194000 |
| H  | -1.661771000 | -6.171356000 | 1.107981000  |
| H  | -2.510737000 | -6.229181000 | -1.215863000 |
| C  | 1.697008000  | 0.918697000  | 0.319165000  |
| Cl | 0.000000000  | 0.000000000  | 2.725418000  |
| O  | 2.696223000  | 1.452159000  | 0.326318000  |
| C  | 2.460575000  | -2.194403000 | -1.028963000 |
| C  | -2.460575000 | 2.194403000  | -1.028963000 |
| H  | 3.287701000  | -1.543048000 | -0.750990000 |
| H  | 1.965518000  | -1.817454000 | -1.919905000 |
| H  | 2.809196000  | -3.217358000 | -1.152559000 |
| H  | -2.809196000 | 3.217358000  | -1.152559000 |
| H  | -3.287701000 | 1.543048000  | -0.750990000 |
| H  | -1.965518000 | 1.817454000  | -1.919905000 |

53

ttt-[RuCl2(CO)2(SePh2)2] symmetry cs (E=-6970.15708578)

|    |              |              |             |
|----|--------------|--------------|-------------|
| Ru | -0.016805000 | 0.698009000  | 0.000000000 |
| Cl | 0.225601000  | -1.698194000 | 0.000000000 |

|    |              |              |              |
|----|--------------|--------------|--------------|
| C  | 1.916627000  | 0.783259000  | 0.000000000  |
| O  | 3.047201000  | 0.822996000  | 0.000000000  |
| Se | -0.007231000 | 0.889049000  | 2.486415000  |
| Se | -0.007231000 | 0.889049000  | -2.486415000 |
| C  | -1.483431000 | -0.085732000 | 3.234294000  |
| C  | 1.454812000  | -0.179420000 | 3.135130000  |
| C  | 1.454812000  | -0.179420000 | -3.135130000 |
| C  | -1.483431000 | -0.085732000 | -3.234294000 |
| C  | -3.622882000 | -1.365640000 | 4.423265000  |
| C  | -2.042889000 | -1.193707000 | 2.614965000  |
| C  | -1.982966000 | 0.391687000  | 4.439418000  |
| C  | -3.056171000 | -0.255399000 | 5.033608000  |
| C  | -3.116786000 | -1.832386000 | 3.218327000  |
| H  | -1.633648000 | -1.560438000 | 1.680470000  |
| H  | -1.540657000 | 1.262612000  | 4.908612000  |
| H  | -3.451631000 | 0.113845000  | 5.972321000  |
| H  | -3.557743000 | -2.699705000 | 2.741243000  |
| H  | -4.463519000 | -1.867438000 | 4.887829000  |
| C  | 3.658873000  | -1.582124000 | 4.031264000  |
| C  | 2.641390000  | 0.497125000  | 3.383928000  |
| C  | 1.353830000  | -1.547155000 | 3.334178000  |
| C  | 2.463003000  | -2.244509000 | 3.789284000  |
| C  | 3.747847000  | -0.212696000 | 3.826963000  |
| H  | 2.704705000  | 1.569319000  | 3.235902000  |
| H  | 0.426464000  | -2.066628000 | 3.134841000  |
| H  | 2.391020000  | -3.313927000 | 3.949017000  |
| H  | 4.676848000  | 0.310302000  | 4.020469000  |
| H  | 4.522126000  | -2.134451000 | 4.383155000  |
| C  | 3.658873000  | -1.582124000 | -4.031264000 |
| C  | 2.641390000  | 0.497125000  | -3.383928000 |
| C  | 1.353830000  | -1.547155000 | -3.334178000 |
| C  | 2.463003000  | -2.244509000 | -3.789284000 |
| C  | 3.747847000  | -0.212696000 | -3.826963000 |
| H  | 2.704705000  | 1.569319000  | -3.235902000 |
| H  | 0.426464000  | -2.066628000 | -3.134841000 |
| H  | 2.391020000  | -3.313927000 | -3.949017000 |
| H  | 4.676848000  | 0.310302000  | -4.020469000 |
| H  | 4.522126000  | -2.134451000 | -4.383155000 |
| C  | -3.622882000 | -1.365640000 | -4.423265000 |
| C  | -2.042889000 | -1.193707000 | -2.614965000 |
| C  | -1.982966000 | 0.391687000  | -4.439418000 |
| C  | -3.056171000 | -0.255399000 | -5.033608000 |
| C  | -3.116786000 | -1.832386000 | -3.218327000 |
| H  | -1.633648000 | -1.560438000 | -1.680470000 |
| H  | -1.540657000 | 1.262612000  | -4.908612000 |
| H  | -3.451631000 | 0.113845000  | -5.972321000 |
| H  | -3.557743000 | -2.699705000 | -2.741243000 |
| H  | -4.463519000 | -1.867438000 | -4.887829000 |
| C  | -1.946020000 | 0.667872000  | 0.000000000  |
| Cl | -0.147465000 | 3.103765000  | 0.000000000  |
| O  | -3.077741000 | 0.717411000  | 0.000000000  |

25

ttt-[RuCl2(CO)2(TeMe2)2] symmetry c2v (E=-1937.36145321)

|    |              |              |              |
|----|--------------|--------------|--------------|
| Ru | 0.000000000  | 0.000000000  | 0.180800000  |
| C  | 0.000000000  | 1.921981000  | 0.184858000  |
| O  | 0.000000000  | 3.057751000  | 0.187014000  |
| Te | 2.639085000  | 0.000000000  | 0.234825000  |
| Te | -2.639085000 | 0.000000000  | 0.234825000  |
| C  | 3.103742000  | -1.546116000 | -1.145495000 |
| C  | 3.103742000  | 1.546116000  | -1.145495000 |
| C  | -3.103742000 | -1.546116000 | -1.145495000 |

|    |              |              |              |
|----|--------------|--------------|--------------|
| C  | -3.103742000 | 1.546116000  | -1.145495000 |
| H  | 4.150476000  | -1.446214000 | -1.425938000 |
| H  | 2.936274000  | -2.500841000 | -0.650727000 |
| H  | 2.444514000  | -1.430535000 | -2.003595000 |
| H  | 4.150476000  | 1.446214000  | -1.425938000 |
| H  | 2.444514000  | 1.430535000  | -2.003595000 |
| H  | 2.936274000  | 2.500841000  | -0.650727000 |
| H  | -2.936274000 | -2.500841000 | -0.650727000 |
| H  | -4.150476000 | -1.446214000 | -1.425938000 |
| H  | -2.444514000 | -1.430535000 | -2.003595000 |
| H  | -2.936274000 | 2.500841000  | -0.650727000 |
| H  | -2.444514000 | 1.430535000  | -2.003595000 |
| H  | -4.150476000 | 1.446214000  | -1.425938000 |
| Cl | 0.000000000  | 0.000000000  | -2.232169000 |
| Cl | 0.000000000  | 0.000000000  | 2.598367000  |
| C  | 0.000000000  | -1.921981000 | 0.184858000  |
| O  | 0.000000000  | -3.057751000 | 0.187014000  |

39

ttt-[RuCl<sub>2</sub>(CO)<sub>2</sub>(TeMePh)<sub>2</sub>] symmetry c2 (E=-2320.52740534)

|    |              |              |              |
|----|--------------|--------------|--------------|
| Ru | 0.000000000  | 0.000000000  | 0.344815000  |
| Cl | 0.000000000  | 0.000000000  | -2.070582000 |
| C  | -1.673924000 | -0.950334000 | 0.328977000  |
| O  | -2.663001000 | -1.506076000 | 0.313038000  |
| Te | -1.326092000 | 2.277670000  | 0.508840000  |
| Te | 1.326092000  | -2.277670000 | 0.508840000  |
| C  | 0.000000000  | 3.709246000  | -0.295076000 |
| C  | 0.000000000  | -3.709246000 | -0.295076000 |
| C  | 1.751671000  | 5.616921000  | -1.273512000 |
| C  | 0.541202000  | 3.556478000  | -1.565878000 |
| C  | 0.331560000  | 4.806340000  | 0.489771000  |
| C  | 1.213985000  | 5.759023000  | -0.003003000 |
| C  | 1.413919000  | 4.517964000  | -2.052968000 |
| H  | 0.303420000  | 2.682867000  | -2.162441000 |
| H  | -0.092734000 | 4.924590000  | 1.480487000  |
| H  | 1.476668000  | 6.614185000  | 0.608726000  |
| H  | 1.837656000  | 4.402810000  | -3.043978000 |
| H  | 2.437808000  | 6.362691000  | -1.657607000 |
| C  | -1.751671000 | -5.616921000 | -1.273512000 |
| C  | -0.331560000 | -4.806340000 | 0.489771000  |
| C  | -0.541202000 | -3.556478000 | -1.565878000 |
| C  | -1.413919000 | -4.517964000 | -2.052968000 |
| C  | -1.213985000 | -5.759023000 | -0.003003000 |
| H  | 0.092734000  | -4.924590000 | 1.480487000  |
| H  | -0.303420000 | -2.682867000 | -2.162441000 |
| H  | -1.837656000 | -4.402810000 | -3.043978000 |
| H  | -1.476668000 | -6.614185000 | 0.608726000  |
| H  | -2.437808000 | -6.362691000 | -1.657607000 |
| C  | 1.673924000  | 0.950334000  | 0.328977000  |
| Cl | 0.000000000  | 0.000000000  | 2.762303000  |
| O  | 2.663001000  | 1.506076000  | 0.313038000  |
| C  | 2.609083000  | -2.214618000 | -1.183272000 |
| C  | -2.609083000 | 2.214618000  | -1.183272000 |
| H  | 3.435158000  | -1.551026000 | -0.932067000 |
| H  | 2.045074000  | -1.819974000 | -2.024991000 |
| H  | 2.971152000  | -3.223584000 | -1.367893000 |
| H  | -2.971152000 | 3.223584000  | -1.367893000 |
| H  | -3.435158000 | 1.551026000  | -0.932067000 |
| H  | -2.045074000 | 1.819974000  | -2.024991000 |

53

ttt-[RuCl<sub>2</sub>(CO)<sub>2</sub>(TePh<sub>2</sub>)<sub>2</sub>] symmetry c2 (E=-2703.69140606)

|    |              |              |              |
|----|--------------|--------------|--------------|
| Ru | 0.000000000  | 0.000000000  | 0.733535000  |
| Cl | 0.000000000  | 0.000000000  | -1.676007000 |
| C  | -1.496556000 | 1.213535000  | 0.734317000  |
| O  | -2.368387000 | 1.938670000  | 0.743713000  |
| Te | 1.615668000  | 2.077354000  | 0.939017000  |
| Te | -1.615668000 | -2.077354000 | 0.939017000  |
| C  | 3.395358000  | 1.593385000  | -0.085092000 |
| C  | 0.867913000  | 3.453398000  | -0.480896000 |
| C  | -3.395358000 | -1.593385000 | -0.085092000 |
| C  | -0.867913000 | -3.453398000 | -0.480896000 |
| C  | 5.799353000  | 1.044684000  | -1.342495000 |
| C  | 3.426098000  | 0.693704000  | -1.142817000 |
| C  | 4.559161000  | 2.217804000  | 0.350358000  |
| C  | 5.762212000  | 1.940354000  | -0.283200000 |
| C  | 4.634021000  | 0.424432000  | -1.770774000 |
| H  | 2.513584000  | 0.216729000  | -1.482968000 |
| H  | 4.534159000  | 2.916329000  | 1.179064000  |
| H  | 6.670764000  | 2.424521000  | 0.055075000  |
| H  | 4.661182000  | -0.274906000 | -2.598341000 |
| H  | 6.740273000  | 0.828327000  | -1.834792000 |
| C  | -0.217817000 | 5.282237000  | -2.253043000 |
| C  | 0.000000000  | 4.433486000  | -0.014120000 |
| C  | 1.201014000  | 3.383945000  | -1.826018000 |
| C  | 0.657557000  | 4.306069000  | -2.708971000 |
| C  | -0.547018000 | 5.344691000  | -0.906653000 |
| H  | -0.252720000 | 4.495948000  | 1.038933000  |
| H  | 1.874573000  | 2.619137000  | -2.190130000 |
| H  | 0.917032000  | 4.255508000  | -3.760118000 |
| H  | -1.225869000 | 6.107918000  | -0.544561000 |
| H  | -0.641843000 | 5.997249000  | -2.948253000 |
| C  | -5.799353000 | -1.044684000 | -1.342495000 |
| C  | -4.559161000 | -2.217804000 | 0.350358000  |
| C  | -3.426098000 | -0.693704000 | -1.142817000 |
| C  | -4.634021000 | -0.424432000 | -1.770774000 |
| C  | -5.762212000 | -1.940354000 | -0.283200000 |
| H  | -4.534159000 | -2.916329000 | 1.179064000  |
| H  | -2.513584000 | -0.216729000 | -1.482968000 |
| H  | -4.661182000 | 0.274906000  | -2.598341000 |
| H  | -6.670764000 | -2.424521000 | 0.055075000  |
| H  | -6.740273000 | -0.828327000 | -1.834792000 |
| C  | 0.217817000  | -5.282237000 | -2.253043000 |
| C  | -1.201014000 | -3.383945000 | -1.826018000 |
| C  | 0.000000000  | -4.433486000 | -0.014120000 |
| C  | 0.547018000  | -5.344691000 | -0.906653000 |
| C  | -0.657557000 | -4.306069000 | -2.708971000 |
| H  | -1.874573000 | -2.619137000 | -2.190130000 |
| H  | 0.252720000  | -4.495948000 | 1.038933000  |
| H  | 1.225869000  | -6.107918000 | -0.544561000 |
| H  | -0.917032000 | -4.255508000 | -3.760118000 |
| H  | 0.641843000  | -5.997249000 | -2.948253000 |
| C  | 1.496556000  | -1.213535000 | 0.734317000  |
| Cl | 0.000000000  | 0.000000000  | 3.152024000  |
| O  | 2.368387000  | -1.938670000 | 0.743713000  |

25

tcc-[RuCl2(CO)2(SMe2)2] symmetry c2v (E=-2197.41495783)

|    |              |             |              |
|----|--------------|-------------|--------------|
| Ru | 0.000000000  | 0.000000000 | 0.219754000  |
| Cl | 0.000000000  | 1.730358000 | 1.910998000  |
| C  | -1.925380000 | 0.000000000 | 0.376616000  |
| O  | -3.041987000 | 0.000000000 | 0.560718000  |
| S  | 0.000000000  | 1.636621000 | -1.473272000 |
| C  | 1.363329000  | 2.758319000 | -1.155074000 |

|    |              |              |              |
|----|--------------|--------------|--------------|
| C  | -1.363329000 | 2.758319000  | -1.155074000 |
| H  | 2.286718000  | 2.224045000  | -1.373838000 |
| H  | 1.270422000  | 3.609266000  | -1.829506000 |
| H  | 1.342339000  | 3.076608000  | -0.113535000 |
| H  | -2.286718000 | 2.224045000  | -1.373838000 |
| H  | -1.342339000 | 3.076608000  | -0.113535000 |
| H  | -1.270422000 | 3.609266000  | -1.829506000 |
| Cl | 0.000000000  | -1.730358000 | 1.910998000  |
| C  | 1.925380000  | 0.000000000  | 0.376616000  |
| S  | 0.000000000  | -1.636621000 | -1.473272000 |
| O  | 3.041987000  | 0.000000000  | 0.560718000  |
| C  | -1.363329000 | -2.758319000 | -1.155074000 |
| C  | 1.363329000  | -2.758319000 | -1.155074000 |
| H  | -2.286718000 | -2.224045000 | -1.373838000 |
| H  | -1.342339000 | -3.076608000 | -0.113535000 |
| H  | -1.270422000 | -3.609266000 | -1.829506000 |
| H  | 1.270422000  | -3.609266000 | -1.829506000 |
| H  | 1.342339000  | -3.076608000 | -0.113535000 |
| H  | 2.286718000  | -2.224045000 | -1.373838000 |

39

tcc-[RuCl2(CO)2(SMePh)2] symmetry c2 (E=-2580.58521109)

|    |              |              |              |
|----|--------------|--------------|--------------|
| Ru | 0.000000000  | 0.000000000  | 0.706022000  |
| Cl | -1.309821000 | -1.090354000 | 2.420077000  |
| C  | 1.230618000  | -1.487659000 | 0.838468000  |
| O  | 1.942619000  | -2.353157000 | 0.990247000  |
| S  | -1.256241000 | -1.002279000 | -1.020361000 |
| C  | -2.983536000 | -1.061227000 | -0.538862000 |
| H  | -3.355388000 | -0.039603000 | -0.614376000 |
| H  | -3.511519000 | -1.698448000 | -1.246638000 |
| H  | -3.085997000 | -1.415501000 | 0.484115000  |
| Cl | 1.309821000  | 1.090354000  | 2.420077000  |
| C  | -1.230618000 | 1.487659000  | 0.838468000  |
| S  | 1.256241000  | 1.002279000  | -1.020361000 |
| O  | -1.942619000 | 2.353157000  | 0.990247000  |
| C  | 2.983536000  | 1.061227000  | -0.538862000 |
| H  | 3.085997000  | 1.415501000  | 0.484115000  |
| H  | 3.511519000  | 1.698448000  | -1.246638000 |
| H  | 3.355388000  | 0.039603000  | -0.614376000 |
| C  | -0.823722000 | -2.720780000 | -1.094139000 |
| C  | 0.823722000  | 2.720780000  | -1.094139000 |
| C  | -0.013280000 | 5.349935000  | -1.274834000 |
| C  | 1.234762000  | 3.636261000  | -0.133169000 |
| C  | 0.000000000  | 3.109239000  | -2.143297000 |
| C  | -0.423943000 | 4.427376000  | -2.225754000 |
| C  | 0.816929000  | 4.953435000  | -0.234129000 |
| H  | 1.848441000  | 3.317872000  | 0.699525000  |
| H  | -0.307250000 | 2.382983000  | -2.886838000 |
| H  | -1.069619000 | 4.732698000  | -3.040430000 |
| H  | 1.134543000  | 5.672006000  | 0.512100000  |
| H  | -0.340539000 | 6.380578000  | -1.343175000 |
| C  | 0.013280000  | -5.349935000 | -1.274834000 |
| C  | 0.000000000  | -3.109239000 | -2.143297000 |
| C  | -1.234762000 | -3.636261000 | -0.133169000 |
| C  | -0.816929000 | -4.953435000 | -0.234129000 |
| C  | 0.423943000  | -4.427376000 | -2.225754000 |
| H  | 0.307250000  | -2.382983000 | -2.886838000 |
| H  | -1.848441000 | -3.317872000 | 0.699525000  |
| H  | -1.134543000 | -5.672006000 | 0.512100000  |
| H  | 1.069619000  | -4.732698000 | -3.040430000 |
| H  | 0.340539000  | -6.380578000 | -1.343175000 |

53

tcc-[RuCl2(CO)2(SPh2)2] symmetry c2 (E=-2963.75193985)

|    |              |              |              |
|----|--------------|--------------|--------------|
| Ru | 0.000000000  | 0.000000000  | 0.864005000  |
| Cl | -1.129867000 | 1.254305000  | 2.585100000  |
| C  | -1.494839000 | -1.222715000 | 1.017521000  |
| O  | -2.375242000 | -1.908347000 | 1.197055000  |
| S  | -1.051371000 | 1.179520000  | -0.891370000 |
| Cl | 1.129867000  | -1.254305000 | 2.585100000  |
| C  | 1.494839000  | 1.222715000  | 1.017521000  |
| S  | 1.051371000  | -1.179520000 | -0.891370000 |
| O  | 2.375242000  | 1.908347000  | 1.197055000  |
| C  | -2.810598000 | 1.225448000  | -0.638961000 |
| C  | 0.606486000  | -2.897734000 | -0.958979000 |
| C  | -0.104253000 | -5.554626000 | -1.234343000 |
| C  | 0.500943000  | -3.453010000 | -2.229489000 |
| C  | 0.355577000  | -3.658584000 | 0.175120000  |
| C  | 0.000000000  | -4.990796000 | 0.029696000  |
| C  | 0.146406000  | -4.786413000 | -2.362854000 |
| H  | 0.692129000  | -2.842166000 | -3.103683000 |
| H  | 0.448295000  | -3.211025000 | 1.158133000  |
| H  | -0.195969000 | -5.589440000 | 0.911265000  |
| H  | 0.060409000  | -5.222238000 | -3.350966000 |
| H  | -0.385201000 | -6.595761000 | -1.340707000 |
| C  | -5.552171000 | 1.110892000  | -0.305238000 |
| C  | -3.537328000 | 0.217476000  | -1.261609000 |
| C  | -3.442123000 | 2.181642000  | 0.142830000  |
| C  | -4.817928000 | 2.121823000  | 0.300314000  |
| C  | -4.910874000 | 0.158143000  | -1.083821000 |
| H  | -3.030886000 | -0.514458000 | -1.880744000 |
| H  | -2.869494000 | 2.960710000  | 0.626462000  |
| H  | -5.316829000 | 2.867389000  | 0.907989000  |
| H  | -5.479575000 | -0.628373000 | -1.565207000 |
| H  | -6.626734000 | 1.068543000  | -0.172987000 |
| C  | -0.606486000 | 2.897734000  | -0.958979000 |
| C  | 2.810598000  | -1.225448000 | -0.638961000 |
| C  | 5.552171000  | -1.110892000 | -0.305238000 |
| C  | 3.537328000  | -0.217476000 | -1.261609000 |
| C  | 3.442123000  | -2.181642000 | 0.142830000  |
| C  | 4.817928000  | -2.121823000 | 0.300314000  |
| C  | 4.910874000  | -0.158143000 | -1.083821000 |
| H  | 3.030886000  | 0.514458000  | -1.880744000 |
| H  | 2.869494000  | -2.960710000 | 0.626462000  |
| H  | 5.316829000  | -2.867389000 | 0.907989000  |
| H  | 5.479575000  | 0.628373000  | -1.565207000 |
| H  | 6.626734000  | -1.068543000 | -0.172987000 |
| C  | 0.104253000  | 5.554626000  | -1.234343000 |
| C  | -0.500943000 | 3.453010000  | -2.229489000 |
| C  | -0.355577000 | 3.658584000  | 0.175120000  |
| C  | 0.000000000  | 4.990796000  | 0.029696000  |
| C  | -0.146406000 | 4.786413000  | -2.362854000 |
| H  | -0.692129000 | 2.842166000  | -3.103683000 |
| H  | -0.448295000 | 3.211025000  | 1.158133000  |
| H  | 0.195969000  | 5.589440000  | 0.911265000  |
| H  | -0.060409000 | 5.222238000  | -3.350966000 |
| H  | 0.385201000  | 6.595761000  | -1.340707000 |

25

tcc-[RuCl2(CO)2(SeMe2)2] symmetry c2v (E=-6203.82361531)

|    |              |             |             |
|----|--------------|-------------|-------------|
| Ru | 0.000000000  | 0.000000000 | 0.486232000 |
| Cl | 0.000000000  | 1.722015000 | 2.185693000 |
| C  | -1.924706000 | 0.000000000 | 0.600070000 |
| O  | -3.049153000 | 0.000000000 | 0.737835000 |



|    |              |              |              |
|----|--------------|--------------|--------------|
| Se | 0.000000000  | 1.736976000  | -1.277246000 |
| C  | 1.443924000  | 2.935165000  | -0.798909000 |
| C  | -1.443924000 | 2.935165000  | -0.798909000 |
| H  | 2.378628000  | 2.432340000  | -1.038928000 |
| H  | 1.341824000  | 3.837572000  | -1.398882000 |
| H  | 1.376197000  | 3.148341000  | 0.265958000  |
| H  | -2.378628000 | 2.432340000  | -1.038928000 |
| H  | -1.376197000 | 3.148341000  | 0.265958000  |
| H  | -1.341824000 | 3.837572000  | -1.398882000 |
| Cl | 0.000000000  | -1.722015000 | 2.185693000  |
| C  | 1.924706000  | 0.000000000  | 0.600070000  |
| Se | 0.000000000  | -1.736976000 | -1.277246000 |
| O  | 3.049153000  | 0.000000000  | 0.737835000  |
| C  | -1.443924000 | -2.935165000 | -0.798909000 |
| C  | 1.443924000  | -2.935165000 | -0.798909000 |
| H  | -2.378628000 | -2.432340000 | -1.038928000 |
| H  | -1.376197000 | -3.148341000 | 0.265958000  |
| H  | -1.341824000 | -3.837572000 | -1.398882000 |
| H  | 1.341824000  | -3.837572000 | -1.398882000 |
| H  | 1.376197000  | -3.148341000 | 0.265958000  |
| H  | 2.378628000  | -2.432340000 | -1.038928000 |

39

tcc-[RuCl2(CO)2(SeMePh)2] symmetry c2 (E=-6586.99077168)

|    |              |              |              |
|----|--------------|--------------|--------------|
| Ru | 0.000000000  | 0.000000000  | 0.831381000  |
| Cl | -1.120529000 | -1.269057000 | 2.555834000  |
| C  | 1.451234000  | -1.270144000 | 0.933400000  |
| O  | 2.300912000  | -2.008402000 | 1.053559000  |
| Se | -1.142078000 | -1.254164000 | -0.977326000 |
| C  | -2.927440000 | -1.644481000 | -0.336630000 |
| H  | -3.489314000 | -0.715262000 | -0.416627000 |
| H  | -3.352457000 | -2.403338000 | -0.989907000 |
| H  | -2.876001000 | -1.969016000 | 0.699257000  |
| Cl | 1.120529000  | 1.269057000  | 2.555834000  |
| C  | -1.451234000 | 1.270144000  | 0.933400000  |
| Se | 1.142078000  | 1.254164000  | -0.977326000 |
| O  | -2.300912000 | 2.008402000  | 1.053559000  |
| C  | 2.927440000  | 1.644481000  | -0.336630000 |
| H  | 2.876001000  | 1.969016000  | 0.699257000  |
| H  | 3.352457000  | 2.403338000  | -0.989907000 |
| H  | 3.489314000  | 0.715262000  | -0.416627000 |
| C  | -0.407308000 | -3.026546000 | -0.950185000 |
| C  | 0.407308000  | 3.026546000  | -0.950185000 |
| C  | -0.749209000 | 5.534306000  | -0.991939000 |
| C  | 0.578289000  | 3.872483000  | 0.136801000  |
| C  | -0.335035000 | 3.418237000  | -2.055170000 |
| C  | -0.919519000 | 4.677338000  | -2.069094000 |
| C  | 0.000000000  | 5.132065000  | 0.106420000  |
| H  | 1.129850000  | 3.541174000  | 1.008097000  |
| H  | -0.456684000 | 2.748353000  | -2.898534000 |
| H  | -1.503287000 | 4.987716000  | -2.927548000 |
| H  | 0.128689000  | 5.798778000  | 0.950971000  |
| H  | -1.202634000 | 6.518359000  | -1.006266000 |
| C  | 0.749209000  | -5.534306000 | -0.991939000 |
| C  | 0.335035000  | -3.418237000 | -2.055170000 |
| C  | -0.578289000 | -3.872483000 | 0.136801000  |
| C  | 0.000000000  | -5.132065000 | 0.106420000  |
| C  | 0.919519000  | -4.677338000 | -2.069094000 |
| H  | 0.456684000  | -2.748353000 | -2.898534000 |
| H  | -1.129850000 | -3.541174000 | 1.008097000  |
| H  | -0.128689000 | -5.798778000 | 0.950971000  |
| H  | 1.503287000  | -4.987716000 | -2.927548000 |

|   |             |              |              |
|---|-------------|--------------|--------------|
| H | 1.202634000 | -6.518359000 | -1.006266000 |
|---|-------------|--------------|--------------|

53

tcc-[RuCl2(CO)2(SePh2)2] symmetry c1 (E=-6970.15613177)

|    |              |              |              |
|----|--------------|--------------|--------------|
| Ru | 0.000098000  | 1.375620000  | -0.000285000 |
| Cl | -1.523831000 | 3.087778000  | 0.730819000  |
| C  | 0.810405000  | 1.554304000  | 1.740427000  |
| O  | 1.277449000  | 1.775795000  | 2.747902000  |
| Se | -1.617800000 | -0.319739000 | 0.816081000  |
| Cl | 1.524236000  | 3.087205000  | -0.732265000 |
| C  | -0.811017000 | 1.553749000  | -1.740709000 |
| Se | 1.618172000  | -0.319755000 | -0.816110000 |
| O  | -1.279462000 | 1.774913000  | -2.747601000 |
| C  | -3.395378000 | 0.294627000  | 0.405332000  |
| C  | 1.577770000  | -1.884939000 | 0.300789000  |
| C  | 1.523484000  | -4.229999000 | 1.767854000  |
| C  | 1.838827000  | -3.094810000 | -0.327932000 |
| C  | 1.285578000  | -1.840701000 | 1.655899000  |
| C  | 1.262805000  | -3.017622000 | 2.389103000  |
| C  | 1.810358000  | -4.267647000 | 0.410954000  |
| H  | 2.051505000  | -3.121983000 | -1.389784000 |
| H  | 1.067795000  | -0.903582000 | 2.149301000  |
| H  | 1.033679000  | -2.982486000 | 3.447370000  |
| H  | 2.004996000  | -5.213687000 | -0.079867000 |
| H  | 1.496550000  | -5.148738000 | 2.341532000  |
| C  | -5.955234000 | 1.232094000  | -0.041371000 |
| C  | -4.104734000 | 0.868414000  | 1.450160000  |
| C  | -3.951809000 | 0.177592000  | -0.858064000 |
| C  | -5.238141000 | 0.648508000  | -1.076577000 |
| C  | -5.388336000 | 1.340714000  | 1.220253000  |
| H  | -3.659298000 | 0.952492000  | 2.433921000  |
| H  | -3.403008000 | -0.283150000 | -1.669008000 |
| H  | -5.678521000 | 0.558084000  | -2.062513000 |
| H  | -5.945205000 | 1.792740000  | 2.032389000  |
| H  | -6.958953000 | 1.599967000  | -0.218161000 |
| C  | -1.577870000 | -1.884993000 | -0.300709000 |
| C  | 3.395719000  | 0.294435000  | -0.404934000 |
| C  | 5.955695000  | 1.231378000  | 0.042224000  |
| C  | 4.105955000  | 0.866678000  | -1.450000000 |
| C  | 3.951346000  | 0.178649000  | 0.858934000  |
| C  | 5.237726000  | 0.649300000  | 1.077681000  |
| C  | 5.389617000  | 1.338725000  | -1.219871000 |
| H  | 3.661151000  | 0.949781000  | -2.434127000 |
| H  | 3.401888000  | -0.280922000 | 1.670091000  |
| H  | 5.677468000  | 0.559866000  | 2.063992000  |
| H  | 5.947164000  | 1.789542000  | -2.032214000 |
| H  | 6.959452000  | 1.599055000  | 0.219204000  |
| C  | -1.524348000 | -4.230311000 | -1.767400000 |
| C  | -1.839577000 | -3.094657000 | 0.328147000  |
| C  | -1.285410000 | -1.841094000 | -1.655771000 |
| C  | -1.263024000 | -3.018139000 | -2.388783000 |
| C  | -1.811506000 | -4.267624000 | -0.410553000 |
| H  | -2.052491000 | -3.121576000 | 1.389960000  |
| H  | -1.067206000 | -0.904151000 | -2.149319000 |
| H  | -1.033711000 | -2.983261000 | -3.447017000 |
| H  | -2.006675000 | -5.213496000 | 0.080379000  |
| H  | -1.497692000 | -5.149149000 | -2.340932000 |

25

tcc-[RuCl2(CO)2(TeMe2)2] symmetry c2v (E=-1937.35988137)

|    |             |             |             |
|----|-------------|-------------|-------------|
| Ru | 0.000000000 | 0.000000000 | 0.684927000 |
| Cl | 0.000000000 | 1.714695000 | 2.405479000 |

|    |              |              |              |
|----|--------------|--------------|--------------|
| C  | -1.923155000 | 0.000000000  | 0.744001000  |
| O  | -3.054993000 | 0.000000000  | 0.823049000  |
| Te | 0.000000000  | 1.883365000  | -1.141958000 |
| C  | 1.555824000  | 3.155039000  | -0.458575000 |
| C  | -1.555824000 | 3.155039000  | -0.458575000 |
| H  | 2.505113000  | 2.684761000  | -0.707876000 |
| H  | 1.461253000  | 4.109353000  | -0.972995000 |
| H  | 1.440869000  | 3.260509000  | 0.618274000  |
| H  | -2.505113000 | 2.684761000  | -0.707876000 |
| H  | -1.440869000 | 3.260509000  | 0.618274000  |
| H  | -1.461253000 | 4.109353000  | -0.972995000 |
| Cl | 0.000000000  | -1.714695000 | 2.405479000  |
| C  | 1.923155000  | 0.000000000  | 0.744001000  |
| Te | 0.000000000  | -1.883365000 | -1.141958000 |
| O  | 3.054993000  | 0.000000000  | 0.823049000  |
| C  | -1.555824000 | -3.155039000 | -0.458575000 |
| C  | 1.555824000  | -3.155039000 | -0.458575000 |
| H  | -2.505113000 | -2.684761000 | -0.707876000 |
| H  | -1.440869000 | -3.260509000 | 0.618274000  |
| H  | -1.461253000 | -4.109353000 | -0.972995000 |
| H  | 1.461253000  | -4.109353000 | -0.972995000 |
| H  | 1.440869000  | -3.260509000 | 0.618274000  |
| H  | 2.505113000  | -2.684761000 | -0.707876000 |

39

tcc-[RuCl2(CO)2(TeMePh)2] symmetry c1 (E=-2320.52494078)

|    |              |              |              |
|----|--------------|--------------|--------------|
| Ru | -0.019512000 | 0.951190000  | -0.024880000 |
| Cl | 1.244673000  | 2.646588000  | 1.161721000  |
| C  | 1.207032000  | 1.118408000  | -1.501767000 |
| O  | 1.926823000  | 1.254196000  | -2.366863000 |
| Te | 1.383034000  | -0.992101000 | 1.015731000  |
| C  | 1.877804000  | -0.272874000 | 2.951178000  |
| H  | 0.995080000  | -0.402823000 | 3.575155000  |
| H  | 2.702751000  | -0.876224000 | 3.323871000  |
| H  | 2.137696000  | 0.779290000  | 2.866630000  |
| Cl | -1.417339000 | 2.679864000  | -1.020485000 |
| C  | -1.208447000 | 0.884918000  | 1.491070000  |
| Te | -1.587648000 | -0.553280000 | -1.485835000 |
| O  | -1.887217000 | 0.889022000  | 2.398703000  |
| C  | -0.989026000 | -2.583990000 | -1.290078000 |
| H  | -1.772403000 | -3.206313000 | -1.718665000 |
| H  | -0.806331000 | -2.844668000 | -0.250640000 |
| H  | -0.070200000 | -2.688860000 | -1.865750000 |
| C  | 3.308723000  | -0.748807000 | 0.188892000  |
| C  | -3.305151000 | -0.696042000 | -0.265804000 |
| C  | -5.559242000 | -0.738985000 | 1.345433000  |
| C  | -4.225028000 | 0.343907000  | -0.338501000 |
| C  | -3.508906000 | -1.758802000 | 0.603319000  |
| C  | -4.640928000 | -1.776991000 | 1.406822000  |
| C  | -5.349348000 | 0.320197000  | 0.473466000  |
| H  | -4.059306000 | 1.178355000  | -1.010097000 |
| H  | -2.796962000 | -2.571393000 | 0.672990000  |
| H  | -4.799574000 | -2.606140000 | 2.086549000  |
| H  | -6.063645000 | 1.133523000  | 0.421093000  |
| H  | -6.439313000 | -0.755519000 | 1.977377000  |
| C  | 5.821559000  | -0.500236000 | -0.941621000 |
| C  | 3.868892000  | -1.826639000 | -0.484770000 |
| C  | 3.993705000  | 0.454733000  | 0.300799000  |
| C  | 5.255219000  | 0.571506000  | -0.263512000 |
| C  | 5.128508000  | -1.696328000 | -1.054987000 |
| H  | 3.332535000  | -2.765426000 | -0.567684000 |
| H  | 3.537377000  | 1.301024000  | 0.802411000  |

|   |             |              |              |
|---|-------------|--------------|--------------|
| H | 5.794141000 | 1.508088000  | -0.178940000 |
| H | 5.567339000 | -2.533724000 | -1.584776000 |
| H | 6.805550000 | -0.401014000 | -1.384764000 |

53

tcc-[RuCl<sub>2</sub>(CO)<sub>2</sub>(TePh<sub>2</sub>)<sub>2</sub>] symmetry c1 (E=-2703.69401729)

|    |              |              |              |
|----|--------------|--------------|--------------|
| Ru | 0.012051000  | 1.489719000  | 0.219927000  |
| Cl | -1.480335000 | 3.226222000  | -0.562227000 |
| C  | -1.054182000 | 1.405107000  | 1.823510000  |
| O  | -1.696507000 | 1.452565000  | 2.755810000  |
| Te | -1.508325000 | -0.242279000 | -1.020591000 |
| Cl | 1.296871000  | 3.151096000  | 1.441439000  |
| C  | 0.977526000  | 1.778544000  | -1.419526000 |
| Te | 1.806580000  | -0.202385000 | 1.095669000  |
| O  | 1.489724000  | 1.995491000  | -2.407477000 |
| C  | -1.661588000 | -1.982085000 | 0.167450000  |
| C  | 3.637867000  | 0.337267000  | 0.160180000  |
| C  | 6.091419000  | 0.930842000  | -0.983006000 |
| C  | 3.962066000  | 1.655734000  | -0.121026000 |
| C  | 4.539190000  | -0.686575000 | -0.110210000 |
| C  | 5.763984000  | -0.385292000 | -0.686468000 |
| C  | 5.191975000  | 1.946628000  | -0.697183000 |
| H  | 3.268018000  | 2.453823000  | 0.113822000  |
| H  | 4.291342000  | -1.718147000 | 0.111253000  |
| H  | 6.462633000  | -1.184804000 | -0.904074000 |
| H  | 5.442105000  | 2.976719000  | -0.923339000 |
| H  | 7.048572000  | 1.163122000  | -1.434963000 |
| C  | -1.969260000 | -4.335683000 | 1.600000000  |
| C  | -2.016617000 | -3.151669000 | -0.492629000 |
| C  | -1.452812000 | -1.989112000 | 1.539801000  |
| C  | -1.609856000 | -3.166622000 | 2.255177000  |
| C  | -2.170414000 | -4.327691000 | 0.227965000  |
| H  | -2.168633000 | -3.153629000 | -1.565852000 |
| H  | -1.164347000 | -1.088517000 | 2.065377000  |
| H  | -1.446098000 | -3.167160000 | 3.326289000  |
| H  | -2.442067000 | -5.240382000 | -0.289154000 |
| H  | -2.087706000 | -5.255804000 | 2.159890000  |
| C  | -3.482402000 | 0.409039000  | -0.621563000 |
| C  | 1.611994000  | -1.935400000 | -0.102246000 |
| C  | 1.327382000  | -4.226795000 | -1.630728000 |
| C  | 1.525757000  | -3.172108000 | 0.521342000  |
| C  | 1.569276000  | -1.839104000 | -1.488050000 |
| C  | 1.425772000  | -2.988409000 | -2.250574000 |
| C  | 1.380218000  | -4.318237000 | -0.248128000 |
| H  | 1.560705000  | -3.247827000 | 1.601547000  |
| H  | 1.664414000  | -0.878866000 | -1.981094000 |
| H  | 1.390362000  | -2.913511000 | -3.331029000 |
| H  | 1.302631000  | -5.283314000 | 0.238137000  |
| H  | 1.208790000  | -5.122686000 | -2.228582000 |
| C  | -6.066908000 | 1.310437000  | -0.206361000 |
| C  | -4.116148000 | 1.158237000  | -1.604455000 |
| C  | -4.133938000 | 0.100596000  | 0.563464000  |
| C  | -5.429412000 | 0.555154000  | 0.767621000  |
| C  | -5.410402000 | 1.609904000  | -1.391667000 |
| H  | -3.607582000 | 1.398546000  | -2.530695000 |
| H  | -3.649893000 | -0.495056000 | 1.327499000  |
| H  | -5.939347000 | 0.316219000  | 1.693652000  |
| H  | -5.905037000 | 2.197165000  | -2.156447000 |
| H  | -7.078104000 | 1.663872000  | -0.042468000 |

31

TS1a to [Ru<sub>2</sub>Cl<sub>4</sub>(CO)<sub>6</sub>] + THF symmetry c1 (E=-2942.27773709)

|    |              |              |              |
|----|--------------|--------------|--------------|
| Ru | -2.284624000 | 0.208139000  | -0.115136000 |
| Cl | -0.414826000 | 1.276435000  | 0.938651000  |
| Cl | -0.739838000 | -1.573406000 | -0.760242000 |
| Cl | -2.757951000 | -0.970281000 | 1.917477000  |
| C  | -1.824676000 | 1.121072000  | -1.706351000 |
| O  | -1.528193000 | 1.667581000  | -2.650331000 |
| C  | -3.723786000 | -0.723356000 | -0.903820000 |
| O  | -4.589193000 | -1.289705000 | -1.359335000 |
| O  | -4.081251000 | 2.407938000  | 0.854487000  |
| C  | -3.412388000 | 1.579894000  | 0.475235000  |
| Ru | 1.541856000  | -1.036806000 | 0.000330000  |
| Cl | 2.110865000  | -0.780873000 | -2.276857000 |
| C  | 1.844163000  | -2.830047000 | -0.046858000 |
| C  | 3.353212000  | -0.743385000 | 0.433784000  |
| C  | 1.012886000  | -1.136340000 | 1.836254000  |
| O  | 2.031005000  | -3.945495000 | -0.093231000 |
| O  | 4.450509000  | -0.648601000 | 0.678796000  |
| O  | 0.753380000  | -1.247132000 | 2.928259000  |
| H  | 3.792256000  | 2.246342000  | 1.599279000  |
| O  | 2.574110000  | 1.563930000  | 0.084082000  |
| C  | 2.368945000  | 2.418853000  | -1.049300000 |
| C  | 2.820940000  | 3.791400000  | -0.596915000 |
| C  | 2.429247000  | 3.777189000  | 0.875049000  |
| C  | 2.752227000  | 2.349463000  | 1.272039000  |
| H  | 2.935888000  | 2.014006000  | -1.886352000 |
| H  | 1.304468000  | 2.410713000  | -1.304036000 |
| H  | 2.342097000  | 4.589577000  | -1.164639000 |
| H  | 3.904052000  | 3.891590000  | -0.705306000 |
| H  | 1.358405000  | 3.964309000  | 0.983217000  |
| H  | 2.971919000  | 4.505677000  | 1.477543000  |
| H  | 2.094858000  | 1.960666000  | 2.051715000  |

44

TS2a to 2x [RuCl2(CO)3(THF)] symmetry c1 (E= -3174.56760121)

|    |              |              |              |
|----|--------------|--------------|--------------|
| Ru | 2.761622000  | -0.011354000 | -0.429815000 |
| Cl | -3.178877000 | -0.862339000 | 1.963270000  |
| Cl | 0.710384000  | 1.134297000  | -0.886666000 |
| Cl | 3.512771000  | 1.836457000  | 0.904792000  |
| C  | 2.130671000  | -1.438919000 | -1.502019000 |
| O  | 1.788612000  | -2.263148000 | -2.195840000 |
| C  | 3.486780000  | 0.824160000  | -1.925484000 |
| O  | 3.913083000  | 1.360972000  | -2.824532000 |
| O  | 5.416341000  | -1.311310000 | 0.191138000  |
| C  | 4.411065000  | -0.843850000 | -0.033453000 |
| Ru | -2.617882000 | -0.655469000 | -0.325677000 |
| Cl | -0.885213000 | -2.259407000 | -0.041036000 |
| C  | -2.029973000 | -0.427123000 | -2.122198000 |
| C  | -3.738656000 | -1.976794000 | -0.847859000 |
| C  | -4.012569000 | 0.634508000  | -0.466121000 |
| O  | -1.700115000 | -0.324997000 | -3.197367000 |
| O  | -4.431512000 | -2.821630000 | -1.148652000 |
| O  | -4.896784000 | 1.330064000  | -0.562800000 |
| H  | -0.030487000 | -0.151229000 | 1.713280000  |
| O  | 1.894284000  | -0.807447000 | 1.359033000  |
| C  | 2.101403000  | -2.155267000 | 1.834948000  |
| C  | 1.159990000  | -2.310424000 | 3.012459000  |
| C  | 0.976088000  | -0.874869000 | 3.492668000  |
| C  | 0.946515000  | -0.105748000 | 2.194994000  |
| H  | 1.886503000  | -2.847260000 | 1.019765000  |
| H  | 3.150905000  | -2.245268000 | 2.126563000  |
| H  | 1.574509000  | -2.969115000 | 3.775072000  |
| H  | 0.206006000  | -2.717761000 | 2.674801000  |

|   |              |              |              |
|---|--------------|--------------|--------------|
| H | 1.822097000  | -0.557262000 | 4.106772000  |
| H | 0.057582000  | -0.735475000 | 4.062744000  |
| H | 1.287154000  | 0.924725000  | 2.266111000  |
| H | -0.726858000 | 2.122860000  | 1.753038000  |
| O | -2.211315000 | 2.258439000  | 0.327465000  |
| C | -1.977495000 | 3.305301000  | -0.621276000 |
| C | -1.106065000 | 4.326568000  | 0.088390000  |
| C | -1.506468000 | 4.129128000  | 1.545446000  |
| C | -1.686869000 | 2.626270000  | 1.604832000  |
| H | -1.499060000 | 2.879652000  | -1.505631000 |
| H | -2.944756000 | 3.730988000  | -0.910953000 |
| H | -1.274906000 | 5.339940000  | -0.276545000 |
| H | -0.051291000 | 4.077361000  | -0.048671000 |
| H | -2.450922000 | 4.637031000  | 1.758289000  |
| H | -0.755427000 | 4.484625000  | 2.251569000  |
| H | -2.386942000 | 2.288088000  | 2.369836000  |

31

TS3a to [RuCl<sub>2</sub>(CO)<sub>3</sub>(SMe<sub>2</sub>)] + THF symmetry c1 (E=-2065.09736216)

|    |              |              |              |
|----|--------------|--------------|--------------|
| Ru | 0.894805000  | -0.487098000 | 0.016411000  |
| Cl | -0.416492000 | -2.365862000 | 0.763854000  |
| Cl | 0.432201000  | -0.951098000 | -2.268640000 |
| C  | 1.165712000  | -0.080746000 | 1.845455000  |
| O  | 1.325168000  | 0.154307000  | 2.940118000  |
| C  | 2.290688000  | -1.656631000 | 0.000334000  |
| O  | 3.155290000  | -2.388228000 | -0.020904000 |
| O  | 2.663661000  | 1.727746000  | -1.025747000 |
| C  | 1.965310000  | 0.936186000  | -0.613783000 |
| H  | -2.323061000 | -1.499533000 | -1.274715000 |
| O  | -1.980643000 | 0.182354000  | -0.132851000 |
| C  | -2.675893000 | 0.151091000  | 1.119410000  |
| C  | -3.881679000 | -0.747894000 | 0.915173000  |
| C  | -4.155058000 | -0.573931000 | -0.572809000 |
| C  | -2.746800000 | -0.502134000 | -1.126108000 |
| H  | -1.997804000 | -0.221203000 | 1.889421000  |
| H  | -2.971183000 | 1.174917000  | 1.372756000  |
| H  | -4.721514000 | -0.464673000 | 1.550391000  |
| H  | -3.617223000 | -1.785840000 | 1.130113000  |
| H  | -4.689115000 | 0.362170000  | -0.758367000 |
| H  | -4.730756000 | -1.391816000 | -1.007466000 |
| H  | -2.665998000 | 0.052619000  | -2.062691000 |
| S  | -0.365669000 | 2.420101000  | 0.377324000  |
| C  | 0.803309000  | 3.720797000  | 0.781303000  |
| H  | 0.296022000  | 4.685972000  | 0.761547000  |
| H  | 1.168394000  | 3.530216000  | 1.790423000  |
| H  | 1.643563000  | 3.735489000  | 0.086772000  |
| H  | 0.143047000  | 2.893704000  | -1.929446000 |
| C  | -0.756804000 | 2.865954000  | -1.314185000 |
| H  | -1.247645000 | 3.839250000  | -1.332648000 |
| H  | -1.435011000 | 2.102158000  | -1.687668000 |

31

TS3a to [RuCl<sub>2</sub>(CO)<sub>3</sub>(SeMe<sub>2</sub>)] + THF symmetry c1 (E=-4068.30284386)

|    |              |              |              |
|----|--------------|--------------|--------------|
| Ru | -1.138297000 | 0.286561000  | 0.040526000  |
| Cl | -0.699832000 | 2.640052000  | 0.398630000  |
| Cl | -0.990936000 | 0.550693000  | -2.312271000 |
| C  | -1.093957000 | 0.079841000  | 1.920701000  |
| O  | -1.061227000 | -0.034205000 | 3.045613000  |
| C  | -2.889417000 | 0.789218000  | 0.073272000  |
| O  | -3.979223000 | 1.099537000  | 0.080810000  |
| O  | -1.974261000 | -2.554383000 | -0.537963000 |
| C  | -1.578949000 | -1.518726000 | -0.296378000 |

|    |              |              |              |
|----|--------------|--------------|--------------|
| H  | 1.316970000  | 2.039556000  | -1.700324000 |
| O  | 1.745481000  | 0.809948000  | -0.108779000 |
| C  | 2.348025000  | 1.212742000  | 1.123673000  |
| C  | 3.542132000  | 2.058368000  | 0.733357000  |
| C  | 3.016317000  | 2.758532000  | -0.512947000 |
| C  | 2.191984000  | 1.665814000  | -1.169345000 |
| H  | 1.623480000  | 1.798634000  | 1.699147000  |
| H  | 2.607287000  | 0.311495000  | 1.683324000  |
| H  | 4.396615000  | 1.422394000  | 0.486341000  |
| H  | 3.840727000  | 2.746145000  | 1.525130000  |
| H  | 3.804198000  | 3.131883000  | -1.167805000 |
| H  | 2.372851000  | 3.595214000  | -0.231412000 |
| H  | 2.797803000  | 1.067240000  | -1.859225000 |
| Se | 1.288127000  | -1.938816000 | 0.277803000  |
| C  | 0.754058000  | -3.778237000 | 0.580151000  |
| H  | 1.605811000  | -4.427929000 | 0.384841000  |
| H  | 0.459191000  | -3.861305000 | 1.625088000  |
| H  | -0.080678000 | -4.047560000 | -0.064583000 |
| H  | 0.726952000  | -2.484205000 | -2.118893000 |
| C  | 1.613368000  | -2.092493000 | -1.623143000 |
| H  | 2.465612000  | -2.749703000 | -1.785324000 |
| H  | 1.827466000  | -1.090989000 | -1.986360000 |

31

TS3a to [RuCl<sub>2</sub>(CO)<sub>3</sub>(TeMe<sub>2</sub>)] + THF symmetry c1 (E=-1935.06932658)

|    |               |              |              |
|----|---------------|--------------|--------------|
| Ru | -1.191208000  | -0.631730000 | -0.047692000 |
| Cl | -1.233247000  | -0.466495000 | 2.320779000  |
| Cl | -2.7432952000 | 1.225368000  | -0.247635000 |
| C  | -0.055470000  | -2.129297000 | 0.160667000  |
| O  | 0.453485000   | -3.132616000 | 0.325754000  |
| C  | -2.683768000  | -1.678203000 | -0.076496000 |
| O  | -3.607488000  | -2.335445000 | -0.082723000 |
| O  | -1.012865000  | -0.630526000 | -3.064091000 |
| C  | -1.073950000  | -0.636149000 | -1.933871000 |
| H  | -0.673184000  | 2.418477000  | -1.648510000 |
| O  | 0.278150000   | 1.808258000  | 0.078753000  |
| C  | 0.009876000   | 2.685564000  | 1.186888000  |
| C  | -0.316634000  | 4.037877000  | 0.582328000  |
| C  | 0.469514000   | 4.004138000  | -0.721650000 |
| C  | 0.285504000   | 2.561842000  | -1.141028000 |
| H  | -0.803961000  | 2.256289000  | 1.769884000  |
| H  | 0.911492000   | 2.732313000  | 1.806539000  |
| H  | -0.034139000  | 4.860999000  | 1.239115000  |
| H  | -1.386771000  | 4.107741000  | 0.375764000  |
| H  | 1.526289000   | 4.218370000  | -0.540918000 |
| H  | 0.097735000   | 4.702953000  | -1.471433000 |
| H  | 1.090104000   | 2.177899000  | -1.772410000 |
| Te | 2.261873000   | -0.215093000 | -0.254475000 |
| C  | 2.407831000   | -0.142463000 | 1.864024000  |
| H  | 3.421171000   | 0.142352000  | 2.137599000  |
| H  | 1.688643000   | 0.591670000  | 2.217185000  |
| H  | 2.158552000   | -1.123255000 | 2.263708000  |
| H  | 2.924697000   | -2.805217000 | 0.134815000  |
| C  | 3.410292000   | -2.003345000 | -0.418601000 |
| H  | 4.407448000   | -1.816935000 | -0.023823000 |
| H  | 3.470635000   | -2.260754000 | -1.474950000 |

18

TS1b to [Cl<sub>2</sub>(CO)<sub>3</sub>Ru-Cl-RuCl(CO)<sub>3</sub>] symmetry c1 (E=-2709.98493804)

|    |              |              |              |
|----|--------------|--------------|--------------|
| Ru | 1.993512000  | 0.116273000  | -0.008603000 |
| Cl | 1.043623000  | -0.830770000 | -2.004239000 |
| Cl | -0.111121000 | 1.321859000  | 0.313782000  |

|    |              |              |              |
|----|--------------|--------------|--------------|
| Cl | 1.130254000  | -1.666010000 | 1.349640000  |
| C  | 2.612683000  | 1.535066000  | -1.092193000 |
| O  | 2.976449000  | 2.379038000  | -1.749903000 |
| C  | 2.671225000  | 0.850793000  | 1.593882000  |
| O  | 3.070260000  | 1.274283000  | 2.562641000  |
| O  | 4.462966000  | -1.524297000 | -0.474832000 |
| C  | 3.544873000  | -0.891254000 | -0.294935000 |
| Ru | -2.114358000 | 0.068096000  | -0.186739000 |
| Cl | -3.177793000 | 2.162863000  | -0.197174000 |
| C  | -2.313619000 | -0.333163000 | 1.573751000  |
| C  | -3.829500000 | -0.638156000 | -0.541579000 |
| C  | -1.357974000 | -1.690717000 | -0.472934000 |
| O  | -2.429503000 | -0.550454000 | 2.677551000  |
| O  | -4.872285000 | -1.029274000 | -0.716529000 |
| O  | -1.169547000 | -2.787129000 | -0.655808000 |

36

TS2b to 2 x [RuCl<sub>2</sub>(CO)<sub>3</sub>(SMe<sub>2</sub>)] symmetry c1 (E=-3665.67053312)

|    |              |              |              |
|----|--------------|--------------|--------------|
| Ru | -2.458878000 | 0.290223000  | -0.387105000 |
| Cl | 3.845343000  | 0.519368000  | -1.346244000 |
| Cl | -0.393728000 | 0.510202000  | 0.854538000  |
| Cl | -2.235789000 | -2.096924000 | -0.526943000 |
| C  | -2.633186000 | 2.160997000  | -0.215084000 |
| O  | -2.726541000 | 3.282987000  | -0.104293000 |
| C  | -1.433593000 | 0.436057000  | -1.993971000 |
| O  | -0.819279000 | 0.513664000  | -2.935113000 |
| O  | -5.012386000 | -0.015114000 | -1.951071000 |
| C  | -4.059659000 | 0.105961000  | -1.352436000 |
| Ru | 2.428849000  | -0.834593000 | 0.003576000  |
| Cl | 1.654578000  | -1.929248000 | -1.956323000 |
| C  | 1.256352000  | -1.947466000 | 1.005682000  |
| C  | 3.774774000  | -2.031307000 | 0.193669000  |
| C  | 3.034164000  | 0.106550000  | 1.547562000  |
| O  | 0.624894000  | -2.670583000 | 1.600864000  |
| O  | 4.621164000  | -2.779598000 | 0.284277000  |
| O  | 3.468185000  | 0.538640000  | 2.498379000  |
| S  | -3.618306000 | 0.022243000  | 1.758966000  |
| C  | -2.622609000 | -1.098063000 | 2.740391000  |
| C  | -5.032748000 | -1.033120000 | 1.439855000  |
| H  | -1.710246000 | -0.572065000 | 3.008817000  |
| H  | -3.196312000 | -1.341012000 | 3.634497000  |
| H  | -2.388993000 | -1.988806000 | 2.159914000  |
| H  | -5.763783000 | -0.453973000 | 0.878051000  |
| H  | -4.720260000 | -1.912843000 | 0.878371000  |
| H  | -5.461513000 | -1.317304000 | 2.400137000  |
| S  | 2.004154000  | 3.021065000  | 0.841188000  |
| C  | 3.678271000  | 3.649462000  | 0.685609000  |
| C  | 1.433732000  | 3.256830000  | -0.841925000 |
| H  | 4.158715000  | 3.536817000  | 1.657993000  |
| H  | 4.227186000  | 3.067538000  | -0.056187000 |
| H  | 3.675910000  | 4.705453000  | 0.410965000  |
| H  | 0.408788000  | 2.891281000  | -0.882201000 |
| H  | 1.450376000  | 4.313587000  | -1.112376000 |
| H  | 2.049686000  | 2.677544000  | -1.531093000 |

36

TS2b to 2 x [RuCl<sub>2</sub>(CO)<sub>3</sub>(SeMe<sub>2</sub>)] symmetry c1 (E=-7672.08024812)

|    |              |              |              |
|----|--------------|--------------|--------------|
| Ru | 2.431776000  | 0.032294000  | 0.697112000  |
| Cl | -3.914202000 | -0.126576000 | 1.581092000  |
| Cl | 0.298160000  | 0.408478000  | -0.386123000 |
| Cl | 2.482861000  | -2.272182000 | 0.009518000  |
| C  | 2.389688000  | 1.853157000  | 1.174233000  |



|    |              |              |              |
|----|--------------|--------------|--------------|
| O  | 2.351772000  | 2.948701000  | 1.457210000  |
| C  | 1.535549000  | -0.495312000 | 2.304254000  |
| O  | 1.034778000  | -0.797223000 | 3.267294000  |
| O  | 5.123664000  | -0.450592000 | 1.949771000  |
| C  | 4.113511000  | -0.259438000 | 1.475362000  |
| Ru | -2.552971000 | -1.038603000 | -0.148619000 |
| Cl | -1.444274000 | -2.369323000 | 1.481268000  |
| C  | -1.385473000 | -1.776179000 | -1.450014000 |
| C  | -3.757826000 | -2.359319000 | -0.447601000 |
| C  | -3.440272000 | 0.076089000  | -1.413058000 |
| O  | -0.736763000 | -2.271604000 | -2.231856000 |
| O  | -4.515169000 | -3.186948000 | -0.611954000 |
| O  | -4.058266000 | 0.582829000  | -2.217127000 |
| Se | 3.506508000  | 0.692844000  | -1.539553000 |
| C  | 2.489009000  | -0.302769000 | -2.846542000 |
| C  | 5.109091000  | -0.389945000 | -1.613284000 |
| H  | 1.518196000  | 0.177165000  | -2.928183000 |
| H  | 3.035854000  | -0.238682000 | -3.785684000 |
| H  | 2.386745000  | -1.328681000 | -2.500872000 |
| H  | 5.832970000  | 0.039839000  | -0.924234000 |
| H  | 4.854786000  | -1.410438000 | -1.333435000 |
| H  | 5.490613000  | -0.340197000 | -2.631070000 |
| Se | -2.237450000 | 2.683335000  | -0.373673000 |
| C  | -4.080404000 | 3.233757000  | -0.130675000 |
| C  | -1.734723000 | 2.736075000  | 1.494206000  |
| H  | -4.550606000 | 3.242613000  | -1.112734000 |
| H  | -4.580128000 | 2.515148000  | 0.518069000  |
| H  | -4.113256000 | 4.232856000  | 0.300843000  |
| H  | -0.700516000 | 2.405181000  | 1.551130000  |
| H  | -1.826793000 | 3.754973000  | 1.866667000  |
| H  | -2.375501000 | 2.052968000  | 2.049635000  |

36

TS2b to 2 x [RuCl2(CO)3(TeMe2)] symmetry c1 (E=-3405.61202713)

|    |              |              |              |
|----|--------------|--------------|--------------|
| Ru | 2.355768000  | -0.250357000 | 0.902679000  |
| Cl | -4.012044000 | -0.780916000 | 1.395443000  |
| Cl | 0.143776000  | 0.336367000  | 0.066126000  |
| Cl | 2.442273000  | -2.285924000 | -0.386365000 |
| C  | 2.293520000  | 1.368420000  | 1.855153000  |
| O  | 2.243952000  | 2.344345000  | 2.429096000  |
| C  | 1.592807000  | -1.252308000 | 2.360240000  |
| O  | 1.192432000  | -1.832410000 | 3.239339000  |
| O  | 5.160692000  | -0.900959000 | 1.760799000  |
| C  | 4.103502000  | -0.646192000 | 1.442122000  |
| Ru | -2.424789000 | -1.307772000 | -0.326035000 |
| Cl | -1.364148000 | -2.831826000 | 1.177516000  |
| C  | -1.149971000 | -1.769823000 | -1.643042000 |
| C  | -3.530000000 | -2.637001000 | -0.880195000 |
| C  | -3.312856000 | -0.074570000 | -1.477443000 |
| O  | -0.436641000 | -2.092432000 | -2.458764000 |
| O  | -4.225419000 | -3.470976000 | -1.206474000 |
| O  | -3.939736000 | 0.457980000  | -2.260779000 |
| Te | 3.292486000  | 1.093037000  | -1.267186000 |
| C  | 2.096518000  | 0.236213000  | -2.788010000 |
| C  | 5.005033000  | -0.068152000 | -1.736682000 |
| H  | 1.108429000  | 0.681953000  | -2.713942000 |
| H  | 2.566920000  | 0.481587000  | -3.738381000 |
| H  | 2.056858000  | -0.836140000 | -2.613455000 |
| H  | 5.795934000  | 0.190670000  | -1.035875000 |
| H  | 4.726364000  | -1.116737000 | -1.650242000 |
| H  | 5.304038000  | 0.182747000  | -2.752153000 |
| Te | -2.398865000 | 2.565527000  | 0.005531000  |

|   |              |             |              |
|---|--------------|-------------|--------------|
| C | -4.498738000 | 2.872388000 | 0.198189000  |
| C | -2.086245000 | 2.273984000 | 2.087443000  |
| H | -4.909530000 | 2.987435000 | -0.803648000 |
| H | -4.924140000 | 1.995094000 | 0.682936000  |
| H | -4.684292000 | 3.771443000 | 0.782223000  |
| H | -1.020189000 | 2.114035000 | 2.232050000  |
| H | -2.414366000 | 3.163333000 | 2.621705000  |
| H | -2.648683000 | 1.393826000 | 2.393905000  |

27

TS4a,b to [RuCl<sub>2</sub>(CO)<sub>2</sub>(SMe<sub>2</sub>)<sub>2</sub>] + CO symmetry c1 (E=-2310.62946087)

|    |              |              |              |
|----|--------------|--------------|--------------|
| Ru | -0.313514000 | -0.009024000 | 0.151824000  |
| C  | 0.211553000  | -0.785610000 | 1.753568000  |
| O  | 0.531672000  | -1.266591000 | 2.733242000  |
| C  | 1.168598000  | 2.399069000  | -0.227227000 |
| O  | 1.230408000  | 3.507721000  | -0.404540000 |
| C  | 0.432798000  | -1.386115000 | -0.839496000 |
| O  | 0.883402000  | -2.237416000 | -1.448006000 |
| Cl | -0.942509000 | 1.028888000  | -1.944657000 |
| Cl | -1.193780000 | 1.817531000  | 1.485208000  |
| S  | -2.349995000 | -1.062179000 | 0.313440000  |
| C  | -3.634187000 | 0.141482000  | -0.023040000 |
| H  | -3.445252000 | 0.627262000  | -0.977666000 |
| H  | -4.577988000 | -0.404845000 | -0.027139000 |
| H  | -3.613082000 | 0.867721000  | 0.784704000  |
| C  | -2.546500000 | -2.092776000 | -1.138562000 |
| H  | -2.338864000 | -1.512286000 | -2.036316000 |
| H  | -1.861679000 | -2.933863000 | -1.049838000 |
| H  | -3.572748000 | -2.460237000 | -1.139320000 |
| S  | 2.962698000  | -0.032753000 | 0.276102000  |
| C  | 3.714616000  | -1.618844000 | 0.648906000  |
| H  | 3.495859000  | -1.843605000 | 1.692574000  |
| H  | 3.297498000  | -2.401845000 | 0.013991000  |
| H  | 4.795238000  | -1.567907000 | 0.511886000  |
| C  | 3.404080000  | 0.117075000  | -1.456846000 |
| H  | 4.480632000  | 0.254580000  | -1.559009000 |
| H  | 3.087733000  | -0.766474000 | -2.011764000 |
| H  | 2.891358000  | 0.992950000  | -1.853773000 |

27

TS4a,b to [RuCl<sub>2</sub>(CO)<sub>2</sub>(SeMe<sub>2</sub>)<sub>2</sub>] + CO symmetry c1 (E=-6317.03964385)

|    |              |              |              |
|----|--------------|--------------|--------------|
| Ru | 0.342305000  | 0.074752000  | -0.027728000 |
| Cl | 0.626005000  | 1.731062000  | 1.711564000  |
| Cl | 1.359244000  | 1.496365000  | -1.725119000 |
| C  | 0.041428000  | -1.168743000 | -1.367878000 |
| O  | -0.154874000 | -1.931665000 | -2.190504000 |
| Se | -3.012260000 | -0.233035000 | -0.354433000 |
| Se | 2.509216000  | -0.848093000 | 0.517511000  |
| C  | -3.833713000 | -1.958292000 | -0.026776000 |
| C  | -3.406525000 | 0.551084000  | 1.374772000  |
| C  | 3.687024000  | 0.675326000  | 0.689432000  |
| C  | 3.218836000  | -1.489652000 | -1.162670000 |
| H  | -4.897291000 | -1.829162000 | 0.166478000  |
| H  | -3.690162000 | -2.556525000 | -0.924942000 |
| H  | -3.347533000 | -2.438695000 | 0.821468000  |
| H  | -4.468643000 | 0.778571000  | 1.437839000  |
| H  | -3.117221000 | -0.143737000 | 2.161332000  |
| H  | -2.822975000 | 1.466247000  | 1.462101000  |
| H  | 3.397558000  | 1.197592000  | 1.596511000  |
| H  | 4.697207000  | 0.275072000  | 0.766962000  |
| H  | 3.561621000  | 1.310924000  | -0.183049000 |
| H  | 2.683453000  | -2.399749000 | -1.423509000 |

|   |              |              |              |
|---|--------------|--------------|--------------|
| H | 3.080308000  | -0.716689000 | -1.915447000 |
| H | 4.273124000  | -1.708148000 | -1.000515000 |
| C | -0.422971000 | -1.025515000 | 1.248180000  |
| O | -0.848617000 | -1.718530000 | 2.046818000  |
| C | -1.264795000 | 2.304112000  | -0.637564000 |
| O | -1.393048000 | 3.404870000  | -0.826863000 |

27

TS4a,b to [RuCl2(CO)2(TeMe2)2] + CO symmetry c1 (E=-2050.57510062)

|    |              |              |              |
|----|--------------|--------------|--------------|
| Ru | 0.372551000  | 0.134074000  | -0.063370000 |
| Cl | 0.721922000  | 1.772682000  | 1.690070000  |
| Cl | 1.273772000  | 1.598410000  | -1.787204000 |
| C  | 0.092737000  | -1.116034000 | -1.397121000 |
| O  | -0.065956000 | -1.888826000 | -2.220362000 |
| Te | -3.148679000 | -0.202719000 | -0.294985000 |
| Te | 2.742553000  | -0.722759000 | 0.443754000  |
| C  | -4.402564000 | -1.866695000 | 0.170158000  |
| C  | -3.218189000 | 0.573393000  | 1.690097000  |
| C  | 3.895134000  | 1.052254000  | 0.436158000  |
| C  | 3.404884000  | -1.352204000 | -1.468025000 |
| H  | -5.369602000 | -1.504688000 | 0.513863000  |
| H  | -4.524366000 | -2.451602000 | -0.739940000 |
| H  | -3.921301000 | -2.467749000 | 0.939750000  |
| H  | -4.190140000 | 1.028686000  | 1.863555000  |
| H  | -3.047775000 | -0.248395000 | 2.382977000  |
| H  | -2.426442000 | 1.313962000  | 1.793756000  |
| H  | 3.639162000  | 1.602949000  | 1.337168000  |
| H  | 4.940961000  | 0.748374000  | 0.439322000  |
| H  | 3.631415000  | 1.616245000  | -0.454505000 |
| H  | 2.913534000  | -2.293390000 | -1.705327000 |
| H  | 3.138948000  | -0.575287000 | -2.181768000 |
| H  | 4.483023000  | -1.491812000 | -1.410487000 |
| C  | -0.297509000 | -1.005136000 | 1.230301000  |
| O  | -0.654318000 | -1.720787000 | 2.044279000  |
| C  | -1.334982000 | 2.281173000  | -0.528697000 |
| O  | -1.442850000 | 3.389520000  | -0.682926000 |

## 6. References

1. M. Taimisto, R. Oilunkaniemi, R. S. Laitinen, and M. Ahlgrén, *Z. Naturforsch.* 2003, **58b**, 959–964.
2. R. Oilunkaniemi, R. S. Laitinen, and M. Ahlgrén, *Inorg. Chem. Commun.* 2000, **3**, 8–10.
3. H. C. E. McFarlane and W. McFarlane, *J. Chem. Soc., Dalton Trans.* 1973, 2416–2418.
4. G. Garcia-Herbosa, W. R. McNamara, W. W. Brennessel, J. V. Cuevas, S. Sur, and R. Eisenberg, *Polyhedron* 2013, **58**, 39–46.
5. T. Maaninen, H. M. Tuononen, K. Kosunen, R. Oilunkaniemi, J. Hiitola, R. Laitinen, and T. Chivers, *Z. Anorg. Allg. Chem.* 2004, **630**, 1947–1954.
6. L. Vigo, M. J. Poropudas, R. Oilunkaniemi, and R. S. Laitinen, *J. Organomet. Chem.* 2008, **693**, 557–563.
